# Supplementary material for: Avian extinctions induced by the oldest Amazonian hydropower mega dam: evidence from museum collections and sighting data spanning 172 years
Source: PeerJ. 2021 Aug 18;9:e11979. doi: 10.7717/peerj.11979 (PMC8380028; doi:10.7717/peerj.11979)
Supplement: Supplemental Information 2 [file peerj-09-11979-s002.xlsx]

## Sheet: Appendix 1. Checklist THR
ordem taxonomica	Family / Species	Museum	ELN 1985	This study	Digital records	Status	Expected occurrence on Tocantins River	Recorded occurrence on Tucuruí Reservoir	Evidence	Habitat	Microhabitat	Sociality	Diet	IUCN Red List	Brazil Red List	Belém area of endemism	Xingu area of endemism	River effec/Belém area of endemism	River effect/Xingu area of endemism
1	TINAMIDAE
2	Tinamus tao Temminck, 1815			Pc, Qs	XC17677 - SD (UHE Tucurui Reservoir)	resident	on both banks	on both banks	Tape-recorded/Photographed	f	t	s	fr	Vulnerable	VU
3	Tinamus guttatus Pelzeln, 1863	AMNH 1931 (Baiao)		Pc	XC9338 - SD (UHE Tucurui Reservoir), XC400646 - GL (Novo Repartimento)	resident	on both banks	on both banks	Tape-recorded	f	t	s	fr	Near threatened
4	Crypturellus cinereus (Gmelin, 1789)	MPEG 1978 (Tucurui, left bank, Sitio Calandrini)	Operação Curupira 1984	Pc, Bc, Qs	XC4765 - SD (UHE Tucurui Reservoir), WA2119878 - AC, XC213013 - GL (Novo Repartimento), S63290895 - DA, S63631389 - DF, S63291446 - FF (Tucurui),	resident	on both banks	on both banks	Tape-recorded	f	t	s	fr	Least Concern
5	Crypturellus soui (Hermann, 1783)	AMNH 1931 (Baiao); MPEG 1978 (Tucurui, left bank, Sitio Calandrini)	Operação Curupira 1984	Pc, Qs		resident	on both banks	on rigth bank	Tape-recorded	f, sg	t	s	fr	Least Concern
6	Crypturellus strigulosus (Temminck, 1815)	MPEG 1920 (Maraba); AMNH 1931 (Baiao)		Pc, Qs	XC4836 - SD (UHE Tucurui Reservoir)	resident	on both banks	on left bank	Tape-recorded	f	t	s	fr	Least Concern
7	Crypturellus variegatus (Gmelin, 1789)	AMNH 1931 (Baiao); MPEG 1978 (Tucurui, left bank, Sitio Calandrini)		Pc, Bc, Qs		resident	on both banks	on both banks	Tape-recorded	f	t	s	fr	Least Concern
8	ANATIDAE
9	Dendrocygna viduata (Linnaeus, 1766)			Bc, Qs	WA1181862 - IT (Goianesia)	migrant	not expected	on both banks		w	w	s, mf	om	Least Concern
10	Dendrocygna autumnalis (Linnaeus, 1758)			Bc, Qs	WA914603 - FP (Itupiranga)	migrant	on both banks	on both banks		w	w	s, mf	om	Least Concern
11	Cairina moschata (Linnaeus, 1758)			Bc, Qs	WA2121128 - AC (UHE Tucurui Reservoir), WA1179984 - IT (Goianesia)	resident	on both banks	on both banks		w	w	s, mf	om	Least Concern
12	Amazonetta brasiliensis (Gmelin, 1789)			Bc, Qs	WA1181876 - IT (Goianesia)	resident	on both banks	on both banks		w	w	s	om	Least Concern
13	CRACIDAE
14	Penelope superciliaris Temminck, 1815	MPEG 1912 (Arumateua), 1984 (Tucurui, left bank, Prainha)	Operação Curupira 1984	Bc, Qs		resident	on both banks	on both banks		f	t, u	s	fr	Least Concern
15	Penelope pileata Wagler, 1830	MPEG 1978 (Tucurui, left bank, Sitio Calandrini), 1984 (Tucurui)	Operação Curupira 1984	Pc, Bc, Qs	WA1833348 - DF, WA16663 - RCz, WA198887 - SD, XC4885 - SD (UHE Tucurui Reservoir), WA2120197 - AC (Novo Repartimento), S63218830, S63290895, S63339186 - DA, S63631395, S63631389, S63631385, S63291446, - DF, S63218971 - FF (Tucurui)	resident	on both banks	on both banks	Tape-recorded/Photographed	f	t, c	s, mf	fr	Vulnerable	VU
16	Aburria cujubi (Pelzeln, 1858)			Pc, Qs	XC7730- SD (UHE Tucurui Reservoir)	resident	on both banks	on rigth bank	Tape-recorded	f	t, c	s	fr	Least Concern
17	Ortalis ruficeps (Wagler, 1830)	MPEG 1978 (Tucurui, left bank, Sitio Calandrini), 1984 (Tucurui, left bank, Jatobal)	Operação Curupira 1984	Bc	S59204910 - FB, S66125685 - FB(Tucurui)	resident	on left bank	on left bank		sg	ef	mf	fr	Least Concern					x
18	Ortalis superciliaris (Gray, 1867)	MPEG 1912 (Mazagao); AMNH 1931 (Mocajuba)	PIAF 1984; Operação Curupira 1984	Qs	WA2702786 - SD (UHE Tucurui Reservoir), WA3730471 - DF, WA3648272 - DA, WA3255059 - JV (Tucurui), S51874251* - JV, S63290895* - DA, S63631389 - DF, S63291446 - FF (Tucurui)	resident	on rigth bank	on both banks	Photographed	sg	ef	s, mf	fr	Least Concern		x
19	Crax fasciolata Spix, 1825	MPEG 1978 (Tucurui, left bank, Sitio Calandrini)	Operação Curupira 1984	Pc, Bc, Qs		resident	on both banks	on both banks	Photographed	f	t, c	s	fr	Vulnerable	CR, subspecie "pinima" on right bank
20	Pauxi tuberosa (Spix, 1825)	AMNH 1931 (Baiao)		Pc, Qs	XC20639- SD (UHE Tucurui Reservoir)	resident	on both banks	on both banks		f	t, c	s	fr	Least Concern
21	ODONTOPHORIDAE
22	Odontophorus gujanensis (Gmelin, 1789)	MPEG 1912 (Mazagao), 1984 (Tucurui, right bank, Canoal); AMNH 1931 (Baiao and Mocajuba)	PIAF 1984	Pc, Qs		resident	on both banks	on both banks		f	t	mf	om	Near threatened
23	PROCELLARIIDAE
24	Pterodroma incerta (Schlegel, 1863)	MPEG 1984 (Tucurui and Tucurui, Breu Branco)				vagrant	not expected			w	w	s, mf	fi	Endangered	EN
25	CICONIIDAE
26	Mycteria americana Linnaeus, 1758			Bc, Qs	WA2702987 - SD (UHE Tucurui Reservoir), WA1431434 - GC (Novo Repartimento)	migrant	on both banks	on both banks	Photographed	w	a, w	s, mf	fi	Least Concern
27	PHALACROCORACIDAE
28	Nannopterum brasilianus (Gmelin, 1789)			Bc, Qs	WA2716245 - SD (UHE Tucurui Reservoir), WA1640840 - DF, WA3692712 - MT (Tucurui), WA2214973 - TD (Itupiranga)	resident	on both banks	on both banks	Photographed	w	w	s, mf	fi	Least Concern
29	ANHINGIDAE
30	Anhinga anhinga (Linnaeus, 1766)			Bc, Qs	WA2560954 - SD (UHE Tucurui Reservoir), WA2624560 - SD (Novo Repartimento), WA2215011 - TD (Itupiranga)	resident	on both banks	on both banks	Photographed	w	w	s	fi	Least Concern
31	ARDEIDAE
32	Tigrisoma lineatum (Boddaert, 1783)	AMNH 1931 (Baiao, Ilha do Taiuna and Mocajuba)	Operação Curupira 1984	Pc, Mn, Bc, Qs	WA683282 - YF, AW2724154 - SD (UHE Tucurui Reservoir), S63290895 - DA, S63631389 - DF, S63291446 - FF (Tucurui)	resident	on both banks	on both banks	Photographed	w, f	ef, i, t	s	fi	Least Concern
33	Agamia agami (Gmelin, 1789)			Bc, Qs		resident	on both banks	on both banks		w, f	ef, i, t	s	fi	Vulnerable
34	Cochlearius cochlearius (Linnaeus, 1766)	MPEG 1911 (Cameta)		Qs		resident	on both banks			w, f	w	s	fi	Least Concern
35	Zebrilus undulatus (Gmelin, 1789)	MPEG 1912 (Arumateua)				resident	on both banks			w, f	w	s	fi	Near threatened
36	Ixobrychus exilis (Gmelin, 1789)	MPEG 1984 (Tucurui)				resident	on both banks			w	w	s	fi	Least Concern
37	Nycticorax nycticorax (Linnaeus, 1758)		Operação Curupira 1984	Bc, Qs	WA2295622 -FP (Itupiranga)	resident	on both banks	on both banks	Tape-recorded	w	w	s	fi	Least Concern
38	Butorides striata (Linnaeus, 1758)	AMNH 1931 (Baiao, Ilha do Taiuna and Mocajuba)		Bc, Qs	WA2726431 - SD (UHE Tucurui Reservoir), WA2119651 - AC (Novo Repartimento), WA2215310 - TD, WA1489179 - NW, WA1143243 - GC (Itupiranga), WA3691222 - MT (Tucurui), S51874251 - JV (Tucurui)	resident (confirmed breeding activity)	on both banks	on both banks	Photographed	w	w	s	fi	Least Concern
39	Bubulcus ibis (Linnaeus, 1758)			Bc, Qs	WA1185734 - NW (Nova Ipixuna)	resident	on both banks	on both banks		oa, w	t	mf	ar	Least Concern
40	Ardea cocoi Linnaeus, 1766	MPEG 1984 (Tucurui, left bank, Jacunda)	PIAF 1984; Operação Curupira 1984	Pc, Bc, Qs	WA2726432 - SD, WA2121126 - AC, WA2117823 - AC e WA2121125 - AC (UHE Tucurui Reservoir), WA2215012 - TD e WA1175840 - CE (Itupiranga), WA3692711 - MT (Tucurui)	resident (confirmed breeding activity)	on both banks	on both banks	Photographed	w	w	s	fi	Least Concern
41	Ardea alba Linnaeus, 1758			Bc, Qs	WA1139722 - GC (Novo Repartimento), WA2215029 - TD (Itupiranga)	resident	on both banks	on both banks	Photographed	w	w	s	fi	Least Concern
42	Pilherodius pileatus (Boddaert, 1783)	MPEG 1984 (Tucurui, right bank, Canoal)	PIAF 1984	Bc, Qs	WA2726432 - SD (UHE Tucurui Reservoir), WA3707935 - MT (Tucurui), WA151235 - NW (Jacunda), WA1183085 - IT (Goianesia)	resident	on both banks	on both banks	Photographed	w	w	s	fi, ar	Least Concern
43	Egretta thula (Molina, 1782)			Bc, Qs	WA2214974 - TD (Itupiranga)	resident	on both banks	on both banks		w	w	s, mf	fi	Least Concern
44	THRESKIORNITHIDAE
45	Mesembrinibis cayennensis (Gmelin, 1789)			Bc, Qs	WA1441771 - NW (Jacunda), WA1478348 - GC (Novo Repartimento)	resident	on both banks	on both banks		w, f	ef, i, t	s	ar	Least Concern
46	Platalea ajaja Linnaeus, 1758			Bc, Qs	WA2295635 - FP (Itupiranga, UHE Tucurui Reservoir)	migrant	not expected	on both banks	Photographed	w	w	mf	fi, ar	Least Concern
47	CATHARTIDAE
48	Cathartes aura (Linnaeus, 1758)		PIAF 1984	Pc, Bc, Qs	WA2726437 - SD (UHE Tucurui Reservoir), WA933500 - RG, WA2084815 - LC, WA2948114 - DF, WA3701608 - MT (Tucurui), WA2117828 - AC (Novo Repartimento), WA1143245 (Itupiranga), S51858622, S51874251 - JV, S63218830, S63290895 - DA, S63631395, S63631389 - DF, S63218971, S63291446 - FF (Tucurui)	resident	on both banks	on both banks	Photographed	oa, f	a	s, mf	ca	Least Concern
49	Cathartes burrovianus Cassin, 1845			Bc, Qs		resident	on both banks	on both banks		oa, w	a	s	ca	Least Concern
50	Cathartes melambrotus Wetmore, 1964			Pc, Bc, Qs	WA2724156 -SD (UHE Tucurui Reservoir), WA2117882 - AC (Novo Repartimento), WA2212716 - TD (Itupiranga), S63290895 - DA, S63631389 - DF, S63291446 - FF (Tucurui)	resident	on both banks	on both banks	Photographed	f, sg	a	s, mf	ca	Least Concern
51	Coragyps atratus (Bechstein, 1793)			Pc, Bc, Qs	WA2726428 - SD (UHE Tucurui Reservoir), WA960535 - RG, (Tucurui), WA2117829 - AC (Novo Repartimento), S51858622, S51874251 - JV, S59204910 - FB, S63203184, S63290895, S63339186 - DA, S63631389, S63631385 - DF, S63203209, S63291446, S63339866 - FF, S66125685 - FB (Tucurui)	resident	on both banks	on both banks	Photographed	oa, pl, sg	a	s, mf	ca	Least Concern
52	Sarcoramphus papa (Linnaeus, 1758)			Bc, Qs	WA2724153 - SD (UHE Tucurui Reservoir), WA1835821 - DF, WA3218625 - DA (Tucurui), WA2117830 - AC, WA1433956 - FR (Novo Repartimento), WA1179977 - IT, WA1164788 - NM (Goianesia), S63218830*, S63290895 - DA, S63631395, S63631389 - DF, S63218971, S63291446 - FF (Tucurui)	resident	on both banks	on both banks	Photographed	f, sg	a	s, mf	ca	Least Concern
53	PANDIONIDAE
54	Pandion haliaetus (Linnaeus, 1758)			Pc, Bc, Qs	WA15946 - SD, XC10895- SD (UHE Tucurui Reservoir), WA3689978 - MT, WA3621545, WA3392484 - EF, WA3172251 - LC, WA3124573 - DF (Tucurui), WA2489459 - CK, WA2215315 - TD (Itupiranga), WA2867586 - DC (Nova Ipixuna)	migrant	on both banks	on both banks	Tape-recorded/Photographed	w	c	s	fi	Least Concern
55	ACCIPITRIDAE
56	Chondrohierax uncinatus (Temminck, 1822)			Qs	WA2702785 - SD (UHE Tucurui Reservoir), WA1172061 - NW, WA2084814 - LC, WA2528254 - LF, WA2529028 - RG (Tucurui)	resident	on both banks	on rigth bank	Photographed	f, w	m, a	s, mf	mo	Least Concern
57	Elanoides forficatus (Linnaeus, 1758)			Bc, Qs	WA3702853 - MT, WA3621543 - EF (Tucurui), WA2867579 - DC (Breu Branco), S63218830, S63464378 - DA, S63631395, S63631381 - DF, S63218971, S63472212 - FF (Tucurui)	migrant	on both banks	on both banks		f, sg	a	s, mf	ar, ve	Least Concern
58	Gampsonyx swainsonii Vigors, 1825			Bc, Qs	WA2566999 - SD (UHE Tucurui Reservoir), WA1169750 - NW (Jacunda), WA2122696 - AC, WA2121177 - AC (Novo Repartimento)	resident	on both banks	on both banks	Photographed	sg, oa	tf	s	ar	Least Concern
59	Harpagus bidentatus (Latham, 1790)	MPEG 1911 (Igarape Itacuna)		Pc, Qs	WA2625462 - SD (UHE Tucurui Reservoir), WA3692713 - MT, WA3392481 - EF, WA2810422 - DF (Tucurui), WA2224877 - AG, WA2125732 - FR, WA2120228 - AC, WA1598068 - GC (Novo Repartimento)	resident	on both banks	on rigth bank	Photographed (after capture by mistnet)	f	c	s	ar, ve	Least Concern
60	Harpagus diodon (Temminck, 1823)				WA3512541 - DF (Tucurui), WA1353717 - GC (Novo Repartimento)	migrant	not expected			f	c	s	ar, ve	Least Concern
61	Accipiter poliogaster (Temminck, 1824)	MPEG 1984 (Tucurui, right bank, Canoal)				resident	on both banks			f	c	s	ar	Near threatened
62	Accipiter superciliosus (Linnaeus, 1766)			Bc, Qs		resident	on both banks	on rigth bank		f, sg	c	s	ve	Least Concern
63	Ictinia plumbea (Gmelin, 1788)	MPEG 1912 (Arumateua)		Pc, Qs	WA2582608 - SD (UHE Tucurui Reservoir), WA3614690 - EF, WA3218626 - DA (Tucurui), S63290895, S63464378 - DA, S63631389, S63631381 - DF, S63291446, S63472212 - FF (Tucurui)	migrant	on both banks	on both banks	Photographed	f, w	a	s, mf	ar	Least Concern
64	Busarellus nigricollis (Latham, 1790)			Pc, Bc, Qs	WA2121176 - AC (Novo Repartimento, UHE Tucurui Reservoir), WA3691211 - MT, WA3392483 - EF, WA2966922 - DF	resident	on both banks	on both banks		w, sg, f	w, ef	s	ar, ve	Least Concern
65	Rostrhamus sociabilis (Vieillot, 1817)	MPEG 1907 (Arumateua), 1910 (Igarape Pai Lourenco), 1984 (Tucurui, right bank, Canoal)	PIAF 1984	Bc, Qs	WA771027 - RC (Novo Repartimento), WA146572 - GSe (Goianesia)	migrant	on both banks	on both banks		w	w	s, mf	mo	Least Concern
66	Helicolestes hamatus (Temminck, 1821)				WA933498 - RG, WA938436 - RG (Tucurui)	resident	on both banks			w	w	s	mo	Least Concern
67	Heterospizias meridionalis (Latham, 1790)			Bc, Qs		resident	on both banks	on both banks		oa, sg	c, a	s	ve	Least Concern
68	Urubitinga urubitinga (Gmelin, 1788)	AMNH 1931 (Baiao)		Pc, Bc, Qs	WA15024 - SD, WA2121129 - AC, XC20644 - SD, XC15522 - SD, XC6350 - SD (UHE Tucurui Reservoir), WA198881 - RCz, WA3837216 - EF, WA3702852 - MT (Tucurui)	resident	on both banks	on both banks	Tape-recorded/Photographed	w, sg	w, a	s	ve	Least Concern
69	Rupornis magnirostris (Gmelin, 1788)	MPEG 1916 (Cameta, Fazenda Vaicajo), 1984 (Tucurui, right bank, Canoal); FMNH 1967 (Itupitunga); AMNH 1931 (Baiao)	PIAF 1984	Pc, Bc, Qs	WA2724152 - SD (UHE Tucurui Reservoir), WA1297184 - NW (Jacunda), WA933499 - RG, WA1908744 - GSi, WA1908742 - Gsi (Tucurui), WA933499 - GC, WA2117826 - AC, (Novo Repartimento), WA1181891 - IT (Goianesia), WA2214968 - TD (Itupiranga), WA1981702 - IT, WA1441760 - NW (Nova Ipixuna), S63203184, S63290895, S63339186 - DA, S63631389, S63339186 - DF, S63203209, S63291446, S63339866 - FF (Tucurui)	resident	on both banks	on both banks	Tape-recorded/Photographed	sg, oa, f	ef	s	ar, ve	Least Concern
70	Geranoaetus albicaudatus (Vieillot, 1816)			Qs	WA2626394 - SD (Novo Repartimento), WA3770247 - DA, S63339186 - DA, S63339186 - DF, S63339866 - FF (Tucurui)	resident	on both banks			oa, sg	a	s	ar, ve	Least Concern
71	Pseudastur albicollis (Latham, 1790)	MPEG (Rio Tocantins)		Bc, Qs		resident	on both banks			f	c	s	ve	Least Concern
72	Leucopternis kuhli Bonaparte, 1850	MPEG 1984 (Tucurui)		Qs		resident	on both banks			f	c	s	ve	Least Concern
73	Buteo nitidus (Latham, 1790)			Pc, Bc, Qs	WA2966935 - DF, WA3392480 - EF, WA3648303 - DA, WA3691213 - MT, WA3813430 - MF (Tucurui), WA2121175 - AC e WA2119973 - AC (Novo Repartimento), WA1183086 - IT (Goianesia), S63290895 - DA, S63631389 - DF, S63291446 - FF (Tucurui)	resident	on both banks	on both banks	Tape-recorded	f, w	ef	s	ve	Least Concern
74	Buteo brachyurus Vieillot, 1816			Bc, Qs		resident	on both banks	on both banks	Photographed	sg, oa	a, c	s	ar, ve	Least Concern
75	Buteo albonotatus Kaup, 1847			Bc, Qs	WA2947960 - DF (Tucurui)	low density, unknown status	not expected	on left bank		oa, w	a	s	ar, ve	Least Concern
76	Harpia harpyja (Linnaeus, 1758)		Operação Curupira 1984	Qs	WA1170319 - DM (Novo Repartimento), WA1289715 - GC (Tucurui)	resident	on both banks			f	c	s	ve	Near threatened	VU
77	Spizaetus tyrannus (Wied, 1820)			Qs	XC4841 - SD (UHE Tucurui Reservoir), WA3267672 - JV, WA3220563 - DA (Tucurui), WA1177983 - IT (Goianesia), S63290895 - DA, S63631389 - DF, S63291446 - FF (Tucurui)	resident	on both banks	on rigth bank	Tape-recorded	f	a,c	s	ve	Least Concern
78	Spizaetus melanoleucus (Vieillot, 1816)				WA2829034 - LF (Tucurui)	resident	on both banks			f	a,c	s	ve	Least Concern
79	Spizaetus ornatus (Daudin, 1800)			Pc, Qs	XC8761 - SD (UHE Tucurui Reservoir)	resident	on left bank	on rigth bank	Tape-recorded	f	a, c	s	ve	Near threatened
80	EURYPYGIDAE
81	Eurypyga helias (Pallas, 1781)	MCZ 1920 (Maraba); AMNH 1931 (Baiao and Ilha do Taiuna)		Pc, Bc, Qs		resident	on both banks	on both banks		w, f	w, t	s	ar	Least Concern
82	ARAMIDAE
83	Aramus guarauna (Linnaeus, 1766)			Bc, Qs	WA2092873 - NW (Jacunda), S51858622 - JV (Tucurui)	resident	on both banks	on both banks		w	w	s	mo	Least Concern
84	PSOPHIIDAE
85	Psophia obscura Pelzeln, 1857	MPEG 1984 (Tucurui, right bank, Jacundazinho); AMNH 1931 (Baiao)	PIAF 1984; Operação Curupira 1984	Qs	WA2702779 - SD (UHE Tucurui Reservoir)	resident	on rigth bank	on rigth bank	Photographed	f	t	mf	om	Critically Endangered	CR	x
86	Psophia interjecta Griscom & Greenway, 1937	MCZ 1933 (Cameta)	Operação Curupira 1984		WA1496630 - GC (Novo Repartimento)	resident	on left bank			f	t	mf	om	Endangered	VU		x
87	RALLIDAE
88	Aramides cajaneus (Statius Muller, 1776)	MPEG 1984 (Tucurui, Ilha Tocantins); AMNH 1931 (Baiao)	Operação Curupira 1984	Pc, Bc	S51858622 - JV (Tucurui)	resident	on both banks	on both banks		w, f	w	s, mf	om	Least Concern
89	Amaurolimnas concolor (Gosse, 1847)	MPEG 1987 (Tucurui, left bank)		Bc		resident	on both banks	on left bank		f, sg	t	s	om	Least Concern
90	Laterallus viridis (Statius Muller, 1776)	MPEG 1978 (Tucurui, left bank, Sitio Calandrini); AMNH 1931 (Baiao)	Operação Curupira 1984	Pc, Bc, Qs	WA3825572 - DF, WA3811454- LM, WA3256827 - JV (Tucurui), S63290895, S63339186 - DA, S63631389, S63631385 - DF, S63291446, S63339866 - FF (Tucurui)	resident	on both banks	on both banks		sg	t	s	ar	Least Concern
91	Mustelirallus albicollis (Vieillot, 1819)			Qs	WA1353712 -GC (Novo Repartimento)	low density, unknown status	not expected			w, sg	w	s	ar	Least Concern
92	Porphyrio martinicus (Linnaeus, 1766)	AMNH 1931 (Baiao)	Operação Curupira 1984	Bc, Qs		migrant	on both banks	on left bank		w	w	s	om	Least Concern
93	HELIORNITHIDAE
94	Heliornis fulica (Boddaert, 1783)			Bc, Qs		resident	on both banks	on both banks		w	w	s	ar	Least Concern
95	CHARADRIIDAE
96	Vanellus cayanus (Latham, 1790)	MPEG 1907 (Arumateua), 1984 (Tucurui, Ilha Tangerina); MCZ 1920 (Maraba); AMNH 1931 (Baiao and Mocajuba)	PIAF 1984; Operação Curupira 1984	Bc, Qs	WA2716239 - SD (UHE Tucurui Reservoir), WA1009097 - AL (Goianesia)	resident	on both banks	on both banks	Photographed	w	t	s, mf	ar	Least Concern
97	Vanellus chilensis (Molina, 1782)	MCZ 1920 (Maraba)		Pc, Bc, Qs	WA2716238 - SD (UHE Tucurui Reservoir), WA1426242 - DF (Tucurui), WA2123367 - AC (Novo Repartimento), S63255568, S63290895 - DA, S63631393, S63631389 - DF, S63291442, S63291446 - FF (Tucurui)	resident (confirmed breeding activity)	on both banks	on both banks	Photographed	oa, w	t	s	ar	Least Concern
98	Pluvialis dominica (Statius Muller, 1776)				WA3028719 - LF (Tucurui)	migrant	on both banks			oa, w	t	s	ar	Least Concern
99	Charadrius collaris Vieillot, 1818	MPEG 1984 (Tucurui, Ilha Tangerina); MCZ 1920 (Maraba); AMNH 1931 (Baiao)		Bc, Qs	WA3172252 - LCa (Tucurui), WA2253912 - LM, WA1296994 - FP, WA1175053 - CE, WA169725 - JA (Itupiranga)	resident	on both banks	on both banks	Photographed	w	t	s	ar	Least Concern
100	RECURVIROSTRIDAE
101	Himantopus mexicanus (Statius Muller, 1776)			Bc, Qs		low density, unknown status	not expected	on rigth bank		w, sg	t, w	s	fi, ar	Least Concern
102	SCOLOPACIDAE
103	Actitis macularius (Linnaeus, 1766)	MPEG 1984 (Maraba)		Bc	WA2215313 - TD (Itupiranga)	migrant	on both banks	on both banks		w	t, w	s	ar	Least Concern
104	Tringa solitaria Wilson, 1813			Bc, Qs	WA2122709 - AC, WA2122695 - AC (Novo Repartimento), WA1164795 - NM (Goianesia)	migrant	on both banks	on both banks		w	t, w	s	ar	Least Concern
105	Tringa melanoleuca (Gmelin, 1789)			Bc		migrant	on both banks	on both banks		w	t, w	s	ar	Least Concern
106	Tringa flavipes (Gmelin, 1789)			Bc, Qs		migrant	on both banks	on both banks		w	t, w	s	ar	Least Concern
107	JACANIDAE
108	Jacana jacana (Linnaeus, 1766)	AMNH 1931 (Baiao)	Operação Curupira 1984	Bc, Qs	WA1140667 - GC, WA1139724 - GC, WA2122685 - AC (Novo Repartimento), WA1489211 - NW (Itupiranga), S63290895 - DA, S63631389 - DF, S63291446 - FF (Tucurui)	resident (confirmed breeding activity)	on both banks	on both banks		w	w	s	ar	Least Concern
109	STERCORARIIDAE
110	Stercorarius pomarinus (Temminck, 1815)	MPEG 1984 (Tucurui)				vagrant	not expected			w	w	s, mf	fi	Least Concern
111	STERNIDAE
112	Sternula superciliaris (Vieillot, 1819)			Bc, Qs	WA2668807 - FP (Itupiranga)	resident	on both banks	on both banks	Photographed	w	w	s, mf	fi	Least Concern
113	Phaetusa simplex (Gmelin, 1789)	MPEG 1984 (Tucurui, left and right banks); MCZ 1920 (Maraba); AMNH 1931 (Baiao)	PIAF 1984; Operação Curupira 1984	Bc, Qs	WA2567000 -SD, WA2121173 - AC (UHE Tucurui Reservoir), WA1423442 - DF, WA3701646 - MT, WA3813432- MF (Tucurui), WA2215314 - TD, WA2215030 - TD, WA2214976 - TD, WA1175846 - CE, WA1175259 - GC (Itupiranga), WA2779337 - DC (Nova Ipixuna)	resident	on both banks	on both banks	Photographed	w	w	s, mf	fi	Least Concern
114	Gelochelidon nilotica (Gmelin, 1789)			Bc, Qs		not expected, unknown status	not expected	on rigth bank		w	w	s	fi	Least Concern
115	RYNCHOPIDAE
116	Rynchops niger Linnaeus, 1758	MPEG 1984 (Tucurui, Ilha Tangerina)		Bc, Qs	WA2761166 - DF, WA2255238 - LM, WA901570 - FP (Itupiranga), WA2779340 - DC (Nova Ipixuna)	migrant	on both banks	on both banks	Photographed	w	w	s, mf	fi	Least Concern
117	COLUMBIDAE
118	Columbina passerina (Linnaeus, 1758)	MPEG 1916 (Cameta, Campo de Pucurijo), 1978 (Tucurui, left bank, Sitio Calandrini); AMNH 1931 (Baiao)		Bc, Qs	WA2254063 - LM (Itupiranga), S59204910 - FB (Tucurui)	resident	on both banks	on left bank	Photographed	pl, sg	t	mf	se	Least Concern
119	Columbina minuta (Linnaeus, 1766)			Bc, Qs		resident	on both banks	on both banks		pl, sg	t	mf	se	Least Concern
120	Columbina talpacoti (Temminck, 1810)	MPEG 1907 (Alcobaca [=Tucurui), 1978 (Tucurui, left bank, Sitio Calandrini), 1984 (Maraba); AMNH 1931 (Baiao and Mocajuba)		Bc, Qs	WA2277705 - LC, WA1351946 - DF (Tucurui), WA1337788 - NW (Jacunda), S51858622, S51874251 - JV, S59204910, S66125685 - FB, S63290895 - DA, S63631389 - DF, S63291446 - FF (Tucurui),	resident	on both banks	on both banks		pl, sg	t	mf	se	Least Concern
121	Columbina squammata (Lesson, 1831)			Bc, Qs	WA960531 - RG, WA1908743 -Gsi, WA3285367 - JV (Tucurui), WA2624570 - SD e WA2122639 - AC (Novo Repartimento), WA1162093 - AL (Goianesia), S51858622, S51874251 - JV, S63203184, S63290895 - DA, S63631389 - DF, S63203209, S63291446 - FF (Tucurui)	not expected, probably colonizer	not expected	on rigth bank		pl, ao	t	mf	se	Least Concern
122	Claravis pretiosa (Ferrari-Perez, 1886)			Pc, Qs		resident	on both banks	on rigth bank	Tape-recorded	sg	t, ef, tf	s	se	Least Concern
123	Patagioenas speciosa (Gmelin, 1789)	MPEG 1916 (Cameta, Campo de Pucurijo); AMNH 1931 (Mocajuba)		Pc, Bc, Qs	S63290895 - DA, S63631389 - DF, S63291446 - FF (Tucurui)	resident	on both banks	on both banks		f	c, m	s	fr	Least Concern
124	Patagioenas cayennensis (Bonnaterre, 1792)	MPEG 1907 (Arumateua), 1978 (Tucurui, left bank, Sitio Calandrini), 1984 (Tucurui, Ilha Tangerina); AMNH 1931 (Baiao)		Bc, Qs	WA3232666 - DF (Tucurui), S63290895, S63339186 - DA, S63631389, S63631385 - DF, S63291446, S63339866 - FF (Tucurui)	resident	on both banks	on both banks		sg, w	c, m	s	fr	Least Concern
125	Patagioenas subvinacea (Lawrence, 1868)	MPEG 1907 (Alcobaca [=Tucurui]); AMNH 1931 (Baiao)		Pc, Bc, Qs	WA1834261 - DF (Tucurui), WA1182999 - IT (Goianesia)	resident	on both banks	on both banks	Tape-recorded	f	c, m	s	fr	Vulnerable
126	Zenaida auriculata (Des Murs, 1847)			Bc, Qs		not expected, probably colonizer	not expected	on both banks		pl, ao	t	mf	se	Least Concern
127	Leptotila verreauxi Bonaparte, 1855	AMNH 1931 (Mocajuba); MPEG 1984 (Tucurui, right bank)	PIAF 1984	Pc, Mn, Bc, Qs	WA2716242 - SD (UHE Tucurui Reservoir), WA3285369 - JV (Tucurui), WA1177977 - IT, WA1164796 - NM (Goianesia), S51858622 - JV (Tucurui)	resident	on both banks	on both banks	Tape-recorded/Photographed	f, sg	ef	s	fr	Least Concern
128	Leptotila rufaxilla (Richard & Bernard, 1792)	AMNH 1931 (Baiao, Ilha do Taiuna and Mocajuba); MPEG 1978 (Tucurui, left bank, Sitio Calandrini), 1984 (Tucurui, Ilha Tocantins, Ilha Tangerina, left bank, Jacunda and Igarape Saude, and right bank, Canoal)	PIAF 1984	Pc, Mn, Qs	WA1434148 - GC (Novo Repartimento), S51858622, S51874251 - JV, S63218830, S63464378 - DA, S63631395, S63631381 - DF, S63218971, S63472212 - FF (Tucurui)	resident	on both banks	on both banks	Photographed (after capture by mistnet)	f	ef, u	s	fr	Least Concern
129	Geotrygon violacea (Temminck, 1809)			Qs	XC138398 - SD (UHE Tucurui Reservoir)	not expected, unknown status	not expected	on left bank	Tape-recorded	f	u	s	se	Least Concern
130	Geotrygon montana (Linnaeus, 1758)	MPEG 1911 (Cameta), 1916 (Cameta, Fazenda Vaicajo), 1984 (Tucurui, Vale do Caraipe); AMNH 1931 (Baiao)		Pc, Mn, Bc, Qs		resident	on both banks	on both banks	Photographed (after capture by mistnet)	f	t, u	s	fr	Least Concern
131	OPISTHOCOMIDAE
132	Opisthocomus hoazin (Statius Muller, 1776)	MPEG 1984 (Tucurui, left bank, Timbozal, and right bank, Praia Alta); AMNH 1931 (Baiao, Ilha do Taiuna and Mocajuba)	PIAF 1984; Operação Curupira 1984	Bc, Qs	WA2803717 - DF, WA2212733 - TD (Itupiranga)	resident	on both banks	on both banks	Photographed	w, f	w	s, mf	fo	Least Concern
133	CUCULIDAE
134	Coccycua minuta (Vieillot, 1817)	AMNH 1931 (Mocajuba); MPEG 1984 (Tucurui, Vila Temporaria I)		Mn, Bc, Qs		resident	on both banks	on both banks	Photographed (after capture by mistnet)	sg, w	u	s	ar	Least Concern
135	Piaya cayana (Linnaeus, 1766)	MPEG 1911 (Cameta), 1984 (Tucurui); AMNH 1931 (Baiao and Mocajuba)	Operação Curupira 1984	Pc, Bc, Qs	WA2716246 - SD, XC20646 - SD (UHE Tucurui Reservoir), S63290895, S63464378 - DA, S63631389, S63631381 - DF, S63291446, S63472212 - FF (Tucurui)	resident	on both banks	on both banks	Tape-recorded/Photographed	f, sg	c	s, uf	ar	Least Concern
136	Coccyzus melacoryphus Vieillot, 1817	MPEG 1907 (Arumateua), 1984 (Tucurui, left bank, Ararão)		Qs		migrant	on both banks	on rigth bank		sg	ef, tf	s	ar	Least Concern
137	Crotophaga major Gmelin, 1788	MCZ 1920 (Maraba); AMNH 1931 (Ilha do Taiuna); MPEG 1984 (Tucurui, right bank, Base 4)	Operação Curupira 1984	Pc, Bc, Qs	WA2948140 - DF, WA3256798 - JV (Tucurui), WA2215311 - TD (Itupiranga), S59204910 - FB (Tucurui)	resident	on both banks	on both banks		w, sg	ef, tf	mf	ar	Least Concern
138	Crotophaga ani Linnaeus, 1758	MCZ 1920 (Maraba); MPEG 1978 (Tucurui, left bank, Sitio Calandrini)	Operação Curupira 1984	Pc, Bc, Qs	WA1351969 - DF, WA454891 - JS, S51858622, S51874251 - JV, S59204910 - FB, S63203184, S63290895, S63339186 - DA, S63631389, S63631385 - DF, S63203209, S63291446, S63339866 - FF (Tucurui)	resident	on both banks	on both banks		pl, sg	t	mf	ar	Least Concern
139	Guira guira (Gmelin, 1788)	MCZ 1920 (Maraba)		Qs	WA1297183 - NW (Jacunda), WA2530897 - AN (Goianesia)	resident	on both banks			oa	t	mf	ar	Least Concern
140	Tapera naevia (Linnaeus, 1766)			Pc, Bc, Qs	WA1140663 - SD (UHE Tucurui Reservoir), WA3124574 - DF (Tucurui), WA15025 - GC, WA2120177 - AC (Novo Repartimento), S63290895 - DA, S63631389 - DF, S63291446 - FF (Tucurui)	resident	on both banks	on both banks	Photographed	sg, pl	u	s	ar	Least Concern
141	TYTONIDAE
142	Tyto furcata (Temminck, 1827)	MPEG 1984 (Tucurui)	PIAF 1984	Qs		resident	on both banks			sg	ef	s	ca	Least Concern
143	STRIGIDAE
144	Megascops choliba (Vieillot, 1817)	MPEG 1911 (Cameta)	Operação Curupira 1984	Qs	S63255568 - DA, S63631393 - DF, S63291442 (Tucurui)	resident	on both banks	on rigth bank	Photographed (after capture by mistnet)	sg	m, ef	s	ar	Least Concern
145	Megascops usta (Sclater, 1858)	MPEG 1916 (Cameta, Fazenda Vaicajo), 1984 (Tucurui, left bank, Jacunda and Igarape Saude)	PIAF 1984; Operação Curupira 1984	Qs	XC386693 - SD (UHE Tucurui Reservoir), WA1063958 - FR (Novo Repartimento)	resident	on both banks	on rigth bank	Tape-recorded/Photographed	f	m	s	ar	Least Concern
146	Lophostrix cristata (Daudin, 1800)			Pc, Qs	WA1353694 - GC, WA2222583 - AG (Novo Repartimento)	resident	on both banks	on left bank	Tape-recorded	f	m	s	ar	Least Concern
147	Pulsatrix perspicillata (Latham, 1790)	MPEG 1911 (Cameta); AMNH 1931 (Baiao)		Qs	XC386692- SD (UHE Tucurui Reservoir), WA3158068 - LC (Tucurui)	resident	on both banks	on left bank	Tape-recorded	f	c, m	s	ve	Least Concern
148	Strix huhula Daudin, 1800			Qs	WA3767691 - DA, WA3726377 - DF (Tucurui), S63339186 - DA, S63339186 - DF, S63339866 - FF (Tucurui)	resident	on both banks			f, sg	c	s	ar, ve	Least Concern
149	Glaucidium hardyi Vielliard, 1990			Pc, Qs	WA2626393 - SD (Novo Repartimento)	resident	on both banks	on left bank	Tape-recorded	f	c	s	ar, ve	Least Concern
150	Glaucidium brasilianum (Gmelin, 1788)			Pc, Qs		not expected, probably resident	not expected	on rigth bank		sg	ef	s	ar, ve	Least Concern
151	Athene cunicularia (Molina, 1782)			Bc, Qs	WA2121237 - AC (Novo Repartimento)	not expected, probably colonizer	not expected	on rigth bank		oa, sg	t	mf	ar, ve	Least Concern
152	NYCTIBIIDAE
153	Nyctibius grandis (Gmelin, 1789)			Qs	WA3212017 - DF, WA3220983 - DA, WA3256823 - JV (Tucurui)	resident	on both banks			f, sg	ef	s	ar	Least Concern
154	Nyctibius griseus (Gmelin, 1789)	MPEG 1988 (Tucurui)		Qs	WA3648269 - DA, WA3730480 - DF (Tucurui), S63255568* - DA, S63631393 - DF, S63291442 (Tucurui)	resident	on both banks			f, sg	ef	s	ar	Least Concern
155	CAPRIMULGIDAE
156	Lurocalis semitorquatus (Gmelin, 1789)			Pc, Qs	XC18598- SD (UHE Tucurui Reservoir)	migrant	on both banks	on left bank	Tape-recorded	f	c	s	ar	Least Concern
157	Nyctiprogne leucopyga (Spix, 1825)	MPEG 1984 (Tucurui, right bank, Canoal)	PIAF 1984			resident	on both banks			w	ef	s, mf	ar	Least Concern
158	Nyctidromus nigrescens (Cabanis, 1849)	MPEG 1912 (Arumateua), 1982 (Tucurui, right bank, Base 4)		Pc, Qs	WA1953765 - GC (Novo Repartimento), WA1177107 - IT, WA1164786 - NM, WA1162097 - AL (Goianesia)	resident	on both banks	on left bank	Photographed	f	t, ef	s	ar	Least Concern
159	Nyctidromus albicollis (Gmelin, 1789)	MPEG 1910 (Baiao), 1984 (Tucurui, Remansão da Beira); AMNH 1931 (Baiao and Mocajuba)		Pc, Mn, Bc, Qs	WA3237716 - DF (Tucurui), WA2275051 - GC (Novo Repartimento), WA1182996 - IT (Goianesia), S63255568, S63339186 - DA, S63631393, S63631385 - DF, S63291442, S63339866 - FF (Tucurui)	resident (confirmed breeding activity)	on both banks	on both banks	Tape-recorded/Photographed (after capture by mistnet)	sg, f	t, ef	s	ar	Least Concern
160	Hydropsalis parvula (Gould, 1837)	MPEG 1984 (Tucurui, left bank, Vale do Caraipe and Vila Permanente)		Qs		migrant	on left bank	on left bank		sg	t, ef	s	ar	Least Concern
161	Hydropsalis climacocerca (Tschudi, 1844)	MPEG 1984 (Tucurui, Ilha Tocantins and Ilha Tangerina)	PIAF 1984	Bc, Qs	WA932922 - SD, XC4832 - SD (UHE Tucurui Reservoir), WA2119652 - AC (Novo Repartimento), WA2750388 - FP, WA2255217 - LM, WA2215312 -TD (Itupiranga)	resident (confirmed breeding activity)	on left bank	on left bank	Tape-recorded/Photographed	w	ef	s, mf	ar	Least Concern					x
162	Podager nacunda (Vieillot, 1817)	MPEG 1907 (Alcobaca [=Tucurui])				migrant	on both banks			w, sg	a	s, mf	ar	Least Concern
163	Chordeiles rupestris (Spix, 1825)	MPEG 1984 (Tucurui, Ilha Tocantins and, right bank, Jacundazinho)	PIAF 1984	Bc, Qs	WA2253883 - LM, WA1175055 - CE (Itupiranga)	resident	on left bank	on both banks	Photographed	w	ef	s, mf	ar	Least Concern					x
164	Chordeiles acutipennis (Hermann, 1783)	MPEG 1907 (Alcobaca [=Tucurui]), 1916 (Cameta), 1984 (Tucurui, Ilha Tocantins); AMNH 1931 (Baiao); MCZ 1920 (Maraba)		Qs	WA16607 - SD (UHE Tucurui Reservoir), WA189132 - CC, WA15957 - SD (Tucurui)	resident (confirmed breeding activity)	on both banks	on left bank	Photographed	sg, w	ef	s, mf	ar	Least Concern
165	APODIDAE
166	Chaetura spinicaudus (Temminck, 1839)			Qs	S51874251 - JV, S63290895 - DA, S63631389 - DF, S63291446 - FF (Tucurui)	resident	on both banks			sg, f	a, ef	mf	ar	Least Concern
167	Chaetura brachyura (Jardine, 1846)			Pc, Bc, Qs	WA3255049 - JV (Tucurui), WA2218103 - AG (Novo Repartimento), S51874251 - JV, S63290895 - DA, S63631389 - DF, S63291446 - FF (Tucurui)	resident	on both banks	on both banks		sg, f	a, ef	mf	ar	Least Concern
168	Tachornis squamata (Cassin, 1853)			Qs	WA2123366 - AC (Novo Repartimento), S51874251 - JV (Tucurui)	resident	on both banks			sg	a, ef	mf	ar	Least Concern
169	Panyptila cayennensis (Gmelin, 1789)			Qs		resident	on both banks			sg, f	a	s	ar	Least Concern
170	TROCHILIDAE
171	Glaucis hirsutus (Gmelin, 1788)	MPEG 1978 (Tucurui, left bank, Sitio Calandrini), 1984 (Tucurui, left bank, Cocal and Jacunda, and right bank, Canoal), 1985 (Tucurui, left bank)	PIAF 1984	Pc, Mn, Qs	WA2948097 - DF (Tucurui)	resident	on both banks	on both banks	Tape-recorded/Photographed (after capture by mistnet)	f, sg	u, ef	s	ni	Least Concern
172	Threnetes leucurus (Linnaeus, 1766)			Qs		resident	on both banks	on rigth bank		f, sg	u, ef	s	ni	Least Concern
173	Phaethornis ruber (Linnaeus, 1758)	MPEG 1910 (Baiao), 1911 (Cameta), 1912 (Arumateua), 1984 (Tucurui, left bank, Jacunda and Vale do Caraipe, and Ilha Tocantins)	PIAF 1984	Pc, Mn, Bc, Qs	WA3239908 - DF, WA3267676 - JV (Tucurui), WA2858644 - GL, WA1434123 - GC, XC400643 - GL (Novo Repartimento), S63203184, S63290895 - DA, S63631389 - DF, S63203209, S63291446 - FF (Tucurui)	resident	on both banks	on both banks	Tape-recorded/Photographed (after capture by mistnet)	f, sg	ef, tf, u	s	ni	Least Concern
174	Phaethornis superciliosus (Linnaeus, 1766)	MPEG 1910 (Baiao), 1916 (Cameta, Fazenda Vaicajo), 1978 (Tucurui, left bank, Sitio Calandrini), 1984 (Tucurui, left bank, Cocal, Jacunda and Vale do Caraipe, and right bank, Canoal), 1985 (Tucurui)	PIAF 1984	Pc, Mn, Bc, Qs	WA3232685 e WA3652613 - DF (Tucurui), XC20645 - SD (UHE Tucurui Reservoir), S63339186 - DA, S63631385 - DF, S63339866 - FF (Tucurui)	resident	on both banks	on both banks	Tape-recorded	f	u	s, l	ni	Least Concern
175	Campylopterus largipennis (Boddaert, 1783)	AMNH 1931 (Mocajuba); MPEG 1984 (Tucurui, right bank, Canoal, and left bank, Cocal)	PIAF 1984	Mn, Qs		resident	on both banks	on rigth bank		f	c, ef	s	ni	Least Concern
176	Florisuga mellivora (Linnaeus, 1758)	MPEG 1907 (Arumateua), 1911 (Cameta); AMNH 1931 (Mocajuba)	PIAF 1984	Qs	WA3392486 - EF (Tucurui)	resident	on both banks			f	c	s	ni	Least Concern
177	Anthracothorax nigricollis (Vieillot, 1817)	MPEG 1911 (Cameta), 1916 (Cameta, Campo do Pucurijo), 1988 (Tucurui); AMNH 1931 (Mocajuba)		Pc, Bc, Qs	XC17676 - SD (UHE Tucurui Reservoir), WA1887496 - LF (Novo Repartimento), WA1473994 - GC (Novo Repartimento), S59204910, S66125685 - FB (Tucurui)	migrant	on both banks	on both banks		f, sg	c	s	ni	Least Concern
178	Avocettula recurvirostris (Swainson, 1822)	MPEG 1907 (Arumateua), 1916 (Cameta, Fazenda Vaicajo)				resident	on both banks			f	m	s	ni	Least Concern
179	Lophornis gouldii (Lesson, 1832)	MPEG 1911 (Cameta), 1912 (Arumateua)				resident	on both banks			f	c	s	ni	Vulnerable
180	Chlorestes notata (Reich, 1793)	MPEG 1907 (Arumateua), 1911 (Cameta), 1912 (Arumateua and Mazagao), 1978 (Tucurui, left bank, Sitio Calandrini); AMNH 1931 (Mocajuba and Baiao)				resident	on both banks			sg, f	u	s	ni	Least Concern
181	Thalurania furcata (Gmelin, 1788)	MPEG 1907 (Arumateua), 1911 (Cameta), 1912 (Arumateua), 1916 (Cameta, Fazenda Vaicajo), 1978 (Tucurui, left bank, Sitio Calandrini), 1984 (Tucurui, left bank, Jacunda, and right bank, Canoal) ; AMNH 1931 (Baiao and Mocajuba)	PIAF 1984	Pc, Mn, Qs	WA16599 - SD (UHE Tucurui Reservoir), WA3228835 - DF (Tucurui)	resident	on both banks	on both banks	Photographed	f	u	s	ni	Least Concern
182	Hylocharis sapphirina (Gmelin, 1788)	MPEG 1911 (Cameta); AMNH 1931 (Mocajuba)		Pc		resident	on both banks	on left bank		f	ef	s	ni	Least Concern
183	Amazilia versicolor (Vieillot, 1818)	MPEG 1911 (Cameta)		Mn, Qs	WA1452026 - GC (Novo Repartimento)	resident	on both banks	on rigth bank	Photographed	sg	c, ef, tf	s	ni	Least Concern
184	Amazilia fimbriata (Gmelin, 1788)	MPEG 1907 (Arumateua), 1910 (Igarape Boca do Manapiri), 1912 (Arumateua)	PIAF 1984	Qs	WA2084790 - LC, WA3285366 - JV (Tucurui), WA2121240 - AC, WA2121238 - AC (Novo Repartimento)	resident	on both banks			f	c, ef, tf	s	ni	Least Concern
185	Heliothryx auritus (Gmelin, 1788)	MPEG 1907 (Arumateua), 1910 (Baiao), 1911 (Cameta), 1912 (Arumateua), 1916 (Cameta), 1984 (Tucurui, left bank, Vale do Caraipe); AMNH 1931 (Mocajuba and Baiao)		Pc	XC8665 - SD (UHE Tucurui Reservoir), WA3220544 - DA (Tucurui), S63290895 - DA, S63631389 - DF, S63291446 (Tucurui)	resident	on both banks	on rigth bank		f	c	s	ni	Least Concern
186	Heliomaster longirostris (Audebert & Vieillot, 1801)	MPEG 1911 (Cameta), 1912 (Alcobaca [=Tucurui])				resident	on both banks			f	c	s	ni	Least Concern
187	TROGONIDAE
188	Trogon melanurus Swainson, 1838			Pc, Qs	WA2069378 - FR (Novo Repartimento)	resident	on both banks	on both banks	Tape-recorded	f	m	s, cf	om	Least Concern
189	Trogon viridis Linnaeus, 1766	MPEG 1907 (Arumateua), 1912 (Arumateua and Mazagao), 1916 (Cameta, Fazenda Vaicajo), 1978 (Tucurui, left bank, Sitio Calandrini)	PIAF 1984; Operação Curupira 1984	Pc, Mn, Bc, Qs	WA2810428 - DF, WA2867922 - EM, WA3172393 - LC, WA3256801 - JV, WA3701607 - MT (Tucurui), XC400665 - GL (Novo Repartimento), S63290895, S63464378 - DA, S63631389, S63631381 - DF, S63291446, S63472212 - FF (Tucurui)	resident	on both banks	on both banks	Tape-recorded/Photographed	f	m, ef	s	om	Least Concern
190	Trogon ramonianus Deville & DesMurs, 1849	MPEG 1911 (Cameta), 1912 (Arumateua), 1916 (Cameta, Fazenda Vaicajo)		Bc, Qs	WA11236 - GSe (Goianesia)	resident	on both banks	on both banks	Tape-recorded	f	m, ef	s	om	Least Concern
191	Trogon rufus Gmelin, 1788	AMNH 1931 (Baiao)		Pc, Mn, Qs	WA2567742 - SD (UHE Tucurui Reservoir), XC388517 - FA, XC400661 - GL (Novo Repartimento)	resident	on both banks	on both banks	Tape-recorded/Photographed	f	m	s, cf	om	Least Concern
192	ALCEDINIDAE
193	Megaceryle torquata (Linnaeus, 1766)			Pc, Bc, Qs	WA1255907 - GC, WA1431426 - GC, WA2121131 - AC (Novo Repartimento, UHE Tucurui Reservoir), S51874251 - JV, S63290895 - DA, S63631389 - DF, S63291446 - FF (Tucurui)	resident	on both banks	on both banks		w	w	s	fi	Least Concern
194	Chloroceryle amazona (Latham, 1790)	MPEG 1907 (Alcobaca [=Tucurui], 1912 (Arumateua); MCZ 1920 (Alcobaca [=Tucurui])		Bc, Qs	WA2565173 - SD (UHE Tucurui Reservoir), WA1183084 - IT (Goianesia), WA2761172 - DF, WA2212699 - TD, WA1489210 - NE (Itupiranga), S63290895 - DA, S63631389 - DF, S63291446 - FF (Tucurui)	resident	on both banks	on both banks		w	w	s	fi	Least Concern
195	Chloroceryle aenea (Pallas, 1764)		PIAF 1984	Mn, Bc, Qs		resident	on both banks	on left bank	Photographed (after capture by mistnet)	f	w, u	s	fi	Least Concern
196	Chloroceryle americana (Gmelin, 1788)	MPEG 1984 (Tucurui, rigth bank, Canoal)	PIAF 1984	Pc, Mn, Bc, Qs	WA2565173 - SD (UHE Tucurui Reservoir), WA454898 - JS, WA3254354 - JV, WA3735433 - MT (Tucurui), WA2214971 - TD e WA1143240 - GC (Itupiranga), S51858622, S51874251 - JV, S59204910 (23 - FB (Tucurui)	resident	on both banks	on both banks	Photographed (after capture by mistnet)	w	w	s	pr	Least Concern
197	Chloroceryle inda (Linnaeus, 1766)	MPEG 1912 (Arumateua), 1984 (Tucurui, Ilha Tocantins)		Bc, Qs		resident	on both banks	on both banks		f	w, u	s	fi	Least Concern
198	MOMOTIDAE
199	Momotus momota (Linnaeus, 1766)	MPEG 1910 (Baiao), 1911 (Cameta), 1912 (Arumateua and Mazagao), 1916 (Cameta, Fazenda Vaicajo), 1984 (Tucurui, right bank, Canoal, and left bank, Jacunda and Vale do Caraipe ), 1985 (Tucurui); MCZ 1933 (Cameta); AMNH 1931 (Mocajuba and Baiao)	PIAF 1984; Operação Curupira 1984	Pc, Mn, Qs	WA2716243 - SD, XC29060 - SD (UHE Tucurui Reservoir), WA3227074 - DF, WA3707937 - MT (Tucurui), XC400482 - GL (Novo Repartimento), S63464378 - DA, S63631381 - DF, S63472212 - FF (Tucurui)	resident (confirmed breeding activity)	on both banks	on both banks	Tape-recorded/Photographed	f, sg	m	s	om	Least Concern
200	GALBULIDAE
201	Galbula cyanicollis Cassin, 1851	MPEG 1910 (Baiao), 1911 (Cameta), 1912 (Arumateua and Mazagao), 1916 (Cameta, Fazenda Vaicajo), 1984 (Tucurui, right bank, Canoal, and left bank, Cocal and Jacunda)	PIAF 1984	Pc, Mn, Bc, Qs	WA2565171 - SD, WA3220509 e WA3678609- DA, WA3223265 - DF (Tucurui), WA1177937 - IT (Goianesia), XC213021 - GL (Novo Repartimento), S63203184 - DA, S63203209 - FF (Tucurui)	resident	on both banks	on both banks	Tape-recorded/Photographed	f	m	s	ar	Least Concern
202	Galbula ruficauda Cuvier, 1816	MPEG 1907 (Arumateua), 1910 (Igarape Pai Lourenco), 1912 (Arumateua), 1978 (Tucurui, left bank, Sitio Calandrini), 1984 (Tucurui, left bank, Jacunda, right bank, Canoal, and Ilha Tocantins); MCZ 1920 (Maraba)	PIAF 1984; Operação Curupira 1984	Qs	WA2810443 - DF, WA3648295 - DA (Tucurui), WA2214970 - TD (Itupiranga), S63203184, S63290895* - DA, LISTA S63631389 - DF, S63203209, S63291446 - FF (Tucurui)	resident	on both banks		Tape-recorded	sg	ef	s	ar	Least Concern
203	Galbula dea (Linnaeus, 1758)	MPEG 1907 (Ilha Sao Sebastiao, near Alcobaca [=Tucurui])		Pc, Bc, Qs	WA2726426 - SD (UHE Tucurui Reservoir), WA1167076 - NM (Goianesia), S63290895 - DA, S63631389 - DF, S63291446 - FF (Tucurui)	resident	on both banks	on both banks	Tape-recorded/Photographed	f	c, ef	s	ar	Least Concern
204	Jacamerops aureus (Statius Muller, 1776)	AMNH 1931 (Baiao)		Pc, Qs		resident	on both banks	on left bank		f	m	s	ar	Least Concern
205	BUCCONIDAE
206	Notharchus hyperrhynchus (Sclater, 1856)	MPEG 1911 (Cameta), 1916 (Cameta, Fazenda Vaicajo)		Pc, Bc, Qs	XC5661 - SD (UHE Tucurui Reservoir)	resident	on both banks	on rigth bank	Tape-recorded	f	c	s	ar	Least Concern
207	Notharchus tectus (Boddaert, 1783)	MPEG 1907 (Arumateua), 1910 (Baiao), 1911 (Cameta)		Pc, Bc, Qs	WA2567004 - SD (UHE Tucurui Reservoir), WA3157879 - LC (Tucurui)	resident	on both banks	on both banks	Photographed	f, sg	c, w	s	ar	Least Concern
208	Bucco tamatia Gmelin, 1788	MPEG 1911 (Cameta)		Pc, Qs	WA2565174 - SD (UHE Tucurui Reservoir)	resident	on both banks	on rigth bank	Photographed	f, sg	m, ef	s	ar	Least Concern
209	Bucco capensis Linnaeus, 1766			Pc, Qs	WA2224887 - AG (Novo Repartimento)	resident	on both banks	on both banks		f	m	s	ar	Least Concern
210	Nystalus torridus Bond & Meyer de Schauensee, 1940	MPEG 1984 (Tucurui, right bank, Canoal)	PIAF 1984	Pc, Qs	XC7331 - SD (UHE Tucurui Reservoir)	resident	on both banks	on rigth bank	Tape-recorded	sg	ef	s	ar	Least Concern
211	Malacoptila rufa (Spix, 1824)	MPEG 1910 (Baiao), 1911 (Cameta), 1912 (Arumateua), 1916 (Cameta, Fazenda Vaicajo), 1984 (Tucurui, left bank, Jacunda) ; AMNH 1931 (Baiao)	PIAF 1984	Pc, Mn, Qs	XC4809 - SD (UHE Tucurui Reservoir)	resident	on both banks	on both banks	Tape-recorded/Photographed (after capture by mistnet)	f	u, m	s	ar	Least Concern
212	Nonnula ruficapilla (Tschudi, 1844)	MPEG 1984 (Tucurui, left bank, Jacunda)	PIAF 1984		WA2628533 - SD (Novo Repartimento)	resident	on left bank			f	u, m	s	ar	Least Concern					x
213	Monasa nigrifrons (Spix, 1824)	MPEG 1912 (Arumateua), 1978 (Tucurui, left bank, Sitio Calandrini), 1984 (Tucurui, left bank, Igarape Saude, and right bank, Jacunda), MCZ 1920 (Maraba, Sitio Floresta)	PIAF 1984; Operação Curupira 1984	Pc, Bc, Qs	WA2581325 - SD (UHE Tucurui Reservoir), WA3396326 - EF (Tucurui)	resident	on both banks	on both banks	Tape-recorded/Photographed	f	u, m	mf	ar	Least Concern
214	Monasa morphoeus (Hahn & Küster, 1823)	MPEG 1910 (Baiao), 1911 (Cameta), 1916 (Cameta, Fazenda Vaicajo)		Pc, Mn, Qs	WA2716244 - SD (UHE Tucurui Reservoir), WA2810426 - DF, WA2534863 - RG, WA3218592 - DA, WA3397882 - EF, WA3707944 - MT (Tucurui), WA2222579 - AG, WA2001542 - FR (Novo Repartimento), WA1183567 - IT (Goianesia), S63218830, S63290895 - DA, S63631395, S63631389 - DF, S63218971, S63291446 - FF (Tucurui)	resident	on both banks	on both banks	Tape-recorded/Photographed	f	m	mf	ar	Least Concern
215	Chelidoptera tenebrosa (Pallas, 1782)	MPEG 1910 (Igarape Boca do Manapiri), 1912 (Arumateua), 1916 (Cameta, Campo do Purijo), 1978 (Tucurui, left bank, Sitio Calandrini), 1984 (Tucurui, left bank, Jatobal, right bank, Canoal, Ilha Tocantins, and Ilha Tangerina), 1988 (Tucurui, right bank, Base 4); AMNH 1931 (Mocajuba); MCZ 1920 (Maraba)	PIAF 1984	Bc, Qs	WA1424507 - DF (Breu Branco), WA2122648 - AC (Novo Repartimento), WA2867583 - DC e WA2668806 - FP (Itupiranga), WA277930 - DC (Nova Ipixuna), S63290895 - DA, S63631389 - DF, S63291446 - FF (Tucurui)	resident	on both banks	on both banks	Photographed	f	c, w	s	ar	Least Concern
216	RAMPHASTIDAE
217	Ramphastos toco Statius Muller, 1776	FMNH 1920 (Rio Tocantins)		Bc, Qs		not expected, probably colonizer	not expected	on rigth bank		sg	c	s	om	Least Concern
218	Ramphastos tucanus Linnaeus, 1758	MPEG 1907 (Arumateua and Alcobaca [=Tucurui]), 1912 (Arumateua), 1978 (Tucurui, left bank, Sitio Calandrini); MCZ 1920 (Maraba)	PIAF 1984; Operação Curupira 1984	Pc, Mn, Bc, Qs	WA2724149 - SD (UHE Tucurui Reservoir), WA1709495 - FP, WA3614691 - EF, WA3702856 - MT (Tucurui), WA2122637 - AC (Novo Repartimento), WA2253939 - LM (Itupiranga), S63218830, S63290895, S63339186, S63464378 - DA, S63631395, S63631389, S63339186, S63631381 - DF, S63218971, S63291446, S63339866, S63472212 - FF (Tucurui)	resident	on both banks	on both banks	Tape-recorded/Photographed	f	c	s	om	Vulnerable
219	Ramphastos vitellinus Lichtenstein, 1823	MPEG 1907 (Arumateua)		Pc, Bc, Qs	WA2724151 - SD (UHE Tucurui Reservoir), WA1835843 - DF, WA3172337 - LC (Tucurui), S63290895 - DA, S63631389 - DF, S63291446 - FF (Tucurui)	resident	on both banks	on both banks	Tape-recorded/Photographed	f	c	s	om	Vulnerable
220	Selenidera gouldii (Natterer, 1837)	MPEG 1910 (Baiao), 1912 (Arumateua and Mazagao), 1984 (Tucurui, left bank, Jacunda); AMNH 1931 (Baiao and Mocajuba)	PIAF 1984	Bc, Qs		resident	on both banks	on rigth bank		f	c	mf	om	Least Concern
221	Pteroglossus inscriptus Swainson, 1822	MPEG 1907 (Arumateua), 1910 (Baiao), 1912 (Arumateua and Mazagao), 1978 (Tucurui, right bank, Retiro); MNHN 1967 (Tucurui, Itupiranga)		Pc, Mn, Bc, Qs	WA2724148 - SD (UHE Tucurui Reservoir), WA3267664 - LC (Tucurui), WA1179982 - IT, WA1165956 - NM (Goianesia), XC20571 - SD (UHE Tucurui Reservoir)	resident	on both banks	on both banks	Photographed	f	c	mf	om	Least Concern
222	Pteroglossus bitorquatus Vigors, 1826	MPEG 1911 (Cameta), 1916 (Cameta, Fazenda Vaicajo), MNHN 1967 (Tucurui, Itupiranga)		Pc, Mn, Bc, Qs	WA2567005 - SD (UHE Tucurui Reservoir), WA2810427 - DF, WA3256821 - JV (Tucurui), WA1177986 - IT (Goianesia), XC7142 - SD (UHE Tucurui Reservoir), S63290895 - DA, S63631389 - DF, S63291446 - FF (Tucurui)	resident	on both banks	on both banks	Tape-recorded/Photographed	f	c	mf	om	Endangered	VU - subspecie "bitorquatus" on right bank
223	Pteroglossus aracari (Linnaeus, 1758)	MPEG 1907 (Arumateua), 1912 (Arumateua), 1978 (Tucurui, left bank, Sitio Calandrini)		Pc, Bc, Qs	XC6090 - SD (UHE Tucurui Reservoir), WA914278 - GC (Novo Repartimento), WA1140671 -LF (Jacunda), S63290895, S63339186 - DA, S63631389, S63339186 - DF, S63291446, S63339866 - FF (Tucurui)	resident	on both banks	on both banks	Tape-recorded/Photographed	f	c	mf	om	Least Concern
224	PICIDAE
225	Picumnus aurifrons Pelzeln, 1870	MPEG 1907 (Arumateua), 1912 (Arumateua), 1978 (Tucurui, left bank, Sitio Calandrini), 1984 (Tucurui, left bank, Jacunda)	PIAF 1984		WA2810425 - DF, WA2829035 - LF, WA3237931 - DA (Tucurui)	resident	on both banks			f, sg	c, ef	s	ar	Least Concern
226	Picumnus buffonii Lafresnaye, 1845			Qs	WA1356194 - SD (UHE Tucurui Reservoir), WA1163811 - AL (Goianesia)	resident	on rigth bank	on rigth bank	Photographed	f, sg	c, ef	s	ar	Least Concern				x
227	Picumnus cirratus Temminck, 1825	MPEG 1907 (Arumateua), 1910 (Igarape Pai Lourenco); 1978 (Tucurui, left bank, Sitio Calandrini)				resident	on left bank			f, sg	c, ef	s	ar	Least Concern
228	Melanerpes candidus (Otto, 1796)			Bc, Qs	WA3770205 - DA (Tucurui), S63290895 - DA, S63631389 - DF, S63291446 - FF (Tucurui)	not expected, probably colonizer	not expected	on both banks		sg	u, c	s, mf	om	Least Concern
229	Melanerpes cruentatus (Boddaert, 1783)	MCZ 1920 (Tucurui, left bank); MPEG 1978 (Tucurui, left bank, Sitio Calandrini)		Pc, Bc, Qs	WA2716240 - SD (UHE Tucurui Reservoir), WA1833420 - DF (Tucurui)	resident	on both banks	on both banks	Photographed	f, sg	c, ef, w	mf	om	Least Concern
230	Veniliornis affinis (Swainson, 1821)	MPEG 1907 (Alcobaca [=Tucurui]), 1910 (Baiao), 1911 (Cameta), 1912 (Arumateua), 1984 (Tucurui, Ilha Tocantins); MCZ 1920 (Maraba)		Pc, Mn, Bc, Qs	WA15727 - SD, XC4837 - SD (UHE Tucurui Reservoir), WA3256104 - JV, WA2810436 - DF (Tucurui), S63218830 - DA, S63631395 - DF, S63218971 - FF (Tucurui)	resident	on both banks	on both banks	Tape-recorded/Photographed	f	m, u	s, uf	ar	Least Concern
231	Piculus leucolaemus (Natterer & Malherbe, 1845)	MPEG 1912 (Arumateua)				resident	on left bank			f	m	s, uf	ar	Least Concern					x
232	Piculus flavigula (Boddaert, 1783)	MPEG 1907 (Cameta), 1910 (Igarape Pirinum), 1916 (Cameta, Fazenda Vaicajo); MCZ 1920 (Maraba)		Pc, Bc, Qs		resident	on both banks	on both banks		f	m	s, uf	ar	Least Concern
233	Piculus laemostictus Todd, 1937			Pc		resident	on left bank	on left bank		f	m	s, uf	ar	Least Concern					x
234	Colaptes melanochloros (Gmelin, 1788)			Pc, Bc, Qs	WA146570 - GS (Goianesia)	not expected, probably colonizer	not expected	on both banks		sg	m	s	om	Least Concern
235	Celeus torquatus (Boddaert, 1783)			Pc, Bc, Qs	XC14785 - SD (UHE Tucurui Reservoir)	resident	on both banks	on both banks	Tape-recorded	f	c	s	om	Near threatened	EN - subspecie "pieteroyensi" on right bank
236	Celeus elegans (Statius Muller, 1776)	MPEG 1911 (Cameta)		Mn, Qs		resident	on both banks	on left bank	Photographed (after capture by mistnet)	f	m	s	om	Least Concern
237	Celeus undatus (Linnaeus, 1766)	MPEG 1911 (Cameta); AMNH 1931 (Baiao)		Pc, Qs	S63290895 - DA, S63631389 - DF, S63291446 - FF (Tucurui)	resident	on both banks	on both banks		f	m	s	om	Least Concern
238	Celeus flavus (Statius Muller, 1776)	MCZ 1920 (Maraba)		Pc, Bc, Qs		resident	on both banks	on both banks	Tape-recorded	f, sg, w	m	s	om	Least Concern
239	Dryocopus lineatus (Linnaeus, 1766)	MPEG 1966 (Cameta); AMNH 1931 (Baiao and Mocajuba)	Operação Curupira 1984	Pc, Mn, Bc, Qs	WA2724157 - SD (UHE Tucurui Reservoir), WA3811437 - LM (Tucurui), WA2122694 - AC, WA2212709 - TD, XC213015 - GL (Novo Repartimento), S63290895, S63339186 - DA, S63631389, S63339186 - DF, S63291446, S63339866 - FF (Tucurui)	resident	on both banks	on both banks	Tape-recorded/Photographed	f, sg	ef	s	om	Least Concern
240	Campephilus rubricollis (Boddaert, 1783)	MPEG 1910 (Baiao)		Pc, Mn, Bc, Qs	WA2726434 - SD (UHE Tucurui Reservoir), WA3267673 - JV (Tucurui), WA2627613 - SD e WA2092874 - FR (Novo Repartimento)	resident	on both banks	on both banks	Tape-recorded/Photographed	f	c, m	s	om	Least Concern
241	Campephilus melanoleucos (Gmelin, 1788)	MPEG 1984 (Tucurui, left bank, Igarape Saude)		Pc, Bc, Qs	WA2726435 - SD (UHE Tucurui Reservoir), WA1073400 - FR, WA1433925 - FR e WA2626395 - SD (Novo Repartimento)	resident	on both banks	on both banks	Tape-recorded/Photographed	sg, f	c, m	s	om	Least Concern
242	FALCONIDAE
243	Daptrius ater Vieillot, 1816	MPEG 1984 (Tucurui, left bank, Jatobal and Jacunda)	PIAF 1984	Pc, Bc, Qs	WA2489036 - CK, WA2212702 - TD (Itupiranga)	resident	on both banks	on both banks	Tape-recorded	w, f	c	s, mf	ve	Least Concern
244	Ibycter americanus (Boddaert, 1783)	MPEG 1984 (Tucurui, Ilha Tocantins); AMNH 1931 (Baiao)		Pc, Bc, Qs	WA1289713 - DM (Novo Repartimento), WA1177967 - IT, WA1165967 - NM (Goianesia)	resident	on both banks	on both banks	Tape-recorded/Photographed	f	c	s, mf	om	Least Concern
245	Caracara plancus (Miller, 1777)			Pc, Bc, Qs	WA2121121 - AC e WA2118321 - AC (Novo Repartimento, UHE Tucurui Reservoir), S63218830 - DA, S63631395 - DF, S63218971 - FF (Tucurui)	resident	on both banks	on both banks	Photographed	oa, sg	c, t	s	ca, ar	Least Concern
246	Milvago chimachima (Vieillot, 1816)			Bc, Qs		resident	on both banks	on both banks		w, sg, oa	w	s	ar	Least Concern
247	Herpetotheres cachinnans (Linnaeus, 1758)			Pc, Bc, Qs	WA2726427 - SD (UHE Tucurui Reservoir), WA3157874 - LC, WA3233936 - DA (Tucurui), WA1297203 - NW (Jacunda), WA2122647 - AC (Novo Repartimento). S63290895 - DA, S63631389, S63339186, S63339186 - DF, S63291446, S63339866 - FF (Tucurui)	resident	on both banks	on both banks	Photographed	sg, w, f	ef	s	ve	Least Concern
248	Micrastur ruficollis (Vieillot, 1817)	MPEG 1984 (Tucurui, right bank, Canoal)	PIAF 1984	Pc, Mn, Qs	WA2222547 - AG (Novo Repartimento)	resident	on both banks	on both banks	Tape-recorded/Photographed	f	u, m	s	ve	Least Concern
249	Micrastur mintoni Whittaker, 2003	MPEG 1984 (Tucurui, left bank, Igarape Saude)	PIAF 1984	Pc, Mn, Qs	XC400481 - GL (Novo Repartimento)	resident	on both banks	on left bank	Tape-recorded/Photographed (after capture by mistnet)	f	u, m	s	ve	Least Concern
250	Micrastur mirandollei (Schlegel, 1862)			Qs		resident	on both banks			f	u, m	s	ve	Least Concern
251	Micrastur semitorquatus (Vieillot, 1817)			Pc, Qs	XC20570 - SD (UHE Tucurui Reservoir)	resident	on both banks	on left bank	Tape-recorded	f	u, m	s	ve	Least Concern
252	Falco sparverius Linnaeus, 1758			Bc, Qs	WA1218853 - NW (Jacunda)	migrant	not expected	on left bank		oa, sg	c	s	ar	Least Concern
253	Falco rufigularis Daudin, 1800			Pc, Bc, Qs	WA3236899 - DA, WA3621544 - EF, WA3707936 - MT (Tucurui), WA2121124 - AC (Novo Repartimento, UHE Tucurui Reservoir)	resident	on both banks	on both banks	Tape-recorded	f, sg, w	c, ef	s	ar	Least Concern
254	Falco deiroleucus Temminck, 1825			Bc		resident	on both banks	on both banks		f	c	s	ve	Near threatened
255	Falco peregrinus Tunstall, 1771	MPEG 1985 (Maraba)		Bc, Qs		migrant	on both banks	on rigth bank		f	c, a	s	ar, ve	Least Concern
256	PSITTACIDAE								Photographed
257	Anodorhynchus hyacinthinus (Latham, 1790)			Bc, Qs	WA2624568 - SD (Novo Repartimento)	migrant	on both banks	on left bank	Photographed	f	c	s, mf	fr	Vulnerable
258	Ara macao (Linnaeus, 1758)	MPEG 1907 (Arumateua)		Pc, Bc, Qs	WA2948102 - DF, WA3218607 e WA3744122 - DA (Tucurui), XC27074 - SD (UHE Tucurui Reservoir), XC400401 - GL, XC213006 - GL (Novo Repartimento), S63218830, S63290895 - DA, S63631395, S63631389 - DF, S63218971, S63291446 - FF (Tucurui)	resident	on both banks	on both banks	Photographed	f	c	s, mf	fr	Least Concern
259	Ara chloropterus Gray, 1859	MPEG 1907 (Arumateua)	PIAF 1984	Pc, Bc, Qs	WA15794 - SD (UHE Tucurui Reservoir), WA3396327 - EF, WA3707934 - MT (Tucurui), WA1440035 - GC (Novo Repartimento)	resident	on both banks	on both banks	Photographed	f	c	s	fr	Least Concern
260	Ara severus (Linnaeus, 1758)			Pc, Bc, Qs	WA2726430 - SD (UHE Tucurui Reservoir), WA198878 - RC, WA2948124 - DF, WA3237926 - DA, WA3614687 - EF (Tucurui), WA2092873 - FR, XC213007 - GL (Novo Repartimento)	resident	on both banks	on both banks	Tape-recorded/Photographed	w, f	c	mf	fr	Least Concern
261	Orthopsittaca manilatus (Boddaert, 1783)			Bc, Qs		migrant	on both banks	on left bank		sg, f	c	mf	fr	Least Concern
262	Diopsittaca nobilis (Linnaeus, 1758)			Bc, Qs		resident	on both banks	on both banks		sg, pl	c, ef	mf	fr	Least Concern
263	Guaruba guarouba (Gmelin, 1788)	MPEG 1912 (Arumateua)	PIAF 1984	Pc, Bc, Qs	WA15945 - SD, WA15023 - SD, XC10949 - SD, XC5966 - SD (UHE Tucurui Reservoir), WA3392485 - EF, WA3691203 - MT (Tucurui), WA2001543 - FR (Novo Repartimento), WA1177111 - IT, WA1164784 - NM, WA1162109 - AL, XC155501 - AL, XC155501 (Goianesia), WA2590637 - FP (Itupiranga), ,	resident	on both banks	on both banks	Tape-recorded/Photographed	f	c	mf	fr	Vulnerable	VU
264	Psittacara leucophthalmus (Statius Muller, 1776)	MPEG 1907 (Arumateua), 1912 (Arumateua), 1978 (Tucurui, left bank, Sitio Calandrini), 1988 (Tucurui, right bank, Base 4); MCZ 1920 (Maraba)		Pc, Bc, Qs	WA2726429 - SD (UHE Tucurui Reservoir), WA940563 - RG, WA2966920 - DF (Tucurui)	resident	on both banks	on both banks	Tape-recorded/Photographed	f, sg, pl	c	mf	fr	Least Concern
265	Aratinga jandaya (Gmelin, 1788)				WA198880 - RC (Tucurui)	resident	on both banks			f, sg	ef	mf	fr	Least Concern
266	Eupsittula aurea (Gmelin, 1788)			Qs	WA933501 - RG (Tucurui)	resident	on both banks			sg, pl	c	mf	fr	Least Concern
267	Pyrrhura anerythra Neumann, 1927	ZMB 1912 (Arumateua)			WA3650404 - DA, WA3653451 - DF (Tucurui)	resident	on left bank			f, sg	c	mf	fr	Vulnerable	VU		x
268	Pyrrhura coerulescens Neumann, 1927	AMNH 1931 (Baiao, Rio Tocantins)		Bc, Qs		resident	on rigth bank	on rigth bank		f, sg	c	mf	fr	Vulnerable	VU	x
269	Pyrrhura amazonum Hellmayr, 1906	MPEG 1907 (Arumateua), 1984 (Tucurui, Ilha Tocantins)	PIAF 1984	Pc, Bc, Qs	WA2714407 - SD, XC27117 - SD(UHE Tucurui Reservoir), WA3124572 - DF, WA3232645 - DA (Tucurui), WA2627608 - SD, WA2117880 - AC, WA1887510 - LF (Novo Repartimento), S63339186 - DA, S63339186 - DF, S63339866 - FF (Tucurui)	resident	on both banks	on both banks	Tape-recorded/Photographed	f, sg	c	mf	fr	Endangered
270	Brotogeris chrysoptera (Linnaeus, 1766)	MPEG 1907 (Arumateua), 1916 (Cameta, Fazenda Vaicajo)		Pc, Bc, Qs	WA1277270 - GC (Novo Repartimento), WA2867626 - DC (Itupiranga), S63218830, S63290895, S63339186, S63464378 - DA, S63631395, S63631389, S63339186, S63631381 - DF, S63218971, S63291446, S63339866, S63472212 - FF (Tucurui)	resident	on both banks	on both banks	Tape-recorded	f, sg	c	mf	fr	Least Concern
271	Pionites leucogaster (Kuhl, 1820)	AMNH 1931 (Ilha do Taiuna and Mocajuba)		Pc, Qs	WA3726424 - DF (Tucurui), WA2062806 - GC (Novo Repartimento), S63290895 - DA, S63631389 - DF, S63291446 - FF (Tucurui)	resident	on both banks	on left bank	Tape-recorded	f	c	s, mf	fr	Endangered
272	Pyrilia vulturina (Kuhl, 1820)	MPEG 1912 (Alcobaca [=Tucurui] and Mazagao), 1984 (Tucurui, left bank, Jacunda) ; AMNH 1931 (Mocajuba)	PIAF 1984		WA1838415 - GC (Novo Repartimento)	resident	on both banks			f	c	mf	fr	Vulnerable	VU
273	Pionus menstruus (Linnaeus, 1766)	MPEG 1912 (Arumateua), 1978 (Tucurui, left bank, Sitio Calandrini); MCZ 1920 (Sitio Floresta)		Pc, Bc, Qs	WA2724150 - SD (UHE Tucurui Reservoir), WA1640842 - DF, WA3232671 - DA, WA3267669 - JV, WA3614689 - EF, WA3702854 - MT (Tucurui), WA117822 - GSe (Goianesia), S63218830 - DA, S63631395 - DF, S63218971 - FF (Tucurui)	resident	on both banks	on both banks	Tape-recorded/Photographed	f, sg, pl	c	s, mf	fr	Least Concern
274	Pionus fuscus (Statius Muller, 1776)	MPEG 1907 (Arumateua)		Bc, Qs		resident	on both banks	on rigth bank		f, sg, pl	c	s, mf	fr	Least Concern
275	Amazona farinosa (Boddaert, 1783)		Operação Curupira 1984	Pc, Bc, Qs	WA3218402 - DA (Tucurui), XC6505 - SD (UHE Tucurui Reservoir), XC213005 - GL (Novo Repartimento), S63218830 - DA (Tucurui), S63631395, S63290895, S63631389 - DF, S63218971, S63291446 - FF (Tucurui)	resident	on both banks	on both banks	Tape-recorded	f	c	s, mf	fr	Near threatened
276	Amazona amazonica (Linnaeus, 1766)			Pc, Bc, Qs	WA3218380 - DA, WA3446604 - EM (Tucurui), S59204910 - FB, S63290895 - DA, S63631389 - DF, S63291446 - FF (Tucurui)	resident	on both banks	on both banks	Tape-recorded/Photographed	f, sg	c	s, mf	fr	Least Concern
277	Amazona ochrocephala (Gmelin, 1788)	MPEG 1984 (Tucurui, left bank, Jacunda)	PIAF 1984	Pc, Bc, Qs		resident	on both banks	on both banks	Tape-recorded	f	c	s, mf	fr	Least Concern
278	Amazona aestiva (Linnaeus, 1758)			Bc, Qs		not expected, probably colonizer	not expected	on both banks		sg, pl	c	mf	fr	Least Concern
279	Deroptyus accipitrinus (Linnaeus, 1758)	MPEG 1984 (Tucurui, left bank, Igarape Saude)	PIAF 1984	Pc, Bc, Qs	WA2724155 - SD (UHE Tucurui Reservoir), WA1184572 - IT, WA1165968 - NM (Goianesia)	resident	on both banks	on both banks	Tape-recorded/Photographed	f	c	mf	fr	Least Concern
280	THAMNOPHILIDAE
281	Myrmornis torquata (Boddaert, 1783)	MPEG 1907 (Alcobaca [=Tucurui]), 1912 (Arumateua), 1984 (Tucurui, left bank, Jacunda)	PIAF 1984			resident	on both banks			f	t	s	ar	Near threatened
282	Pygiptila stellaris (Spix, 1825)	MPEG 1912 (Arumateua); AMNH 1931 (Baiao and Mocajuba)		Qs	XC31876 - SD (UHE Tucurui Reservoir), WA2222570 - AG, XC400653 - GL (Novo Repartimento)	resident	on both banks	on rigth bank	Tape-recorded	f	u	s	ar	Least Concern
283	Epinecrophylla leucophthalma (Pelzeln, 1868)	MPEG 1907 (Arumateua), 1911 (Cameta), 1912 (Arumateua), 1916 (Cameta, Fazenda Vaicajo), 1984 (Tucurui, left bank, Jacunda and Vale do Caraipe); LACM 1911 (Cameta)	PIAF 1984		XC213017 - GL (Novo Repartimento)	resident	on left bank			f	u, m	s, uf	ar	Least Concern					x
284	Epinecrophylla ornata (Sclater, 1853)	MPEG 1907 (Arumateua), 1912 (Arumateua), 1984 (Tucurui, left bank, Jacunda and Vale do Caraipe); MCZ 1920 (Sitio Floresta)	PIAF 1984	Pc, Mn, Qs	WA2624569 - SD, XC7150 - SD (UHE Tucurui Reservoir), WA3232678 - DA, WA3653450 - DF (Tucurui), WA2659828 - FA, XC388511 - FA, XC400402 - GL, XC213019 - GL (Novo Repartimento)	resident	on left bank	on left bank	Tape-recorded/Photographed (after capture by mistnet)	f	m, u	s, uf	ar	Least Concern					x
285	Myrmotherula brachyura (Hermann, 1783)	MPEG 1910 (Igarape Pirinum), 1911 (Cameta), 1912 (Arumateua)		Pc		resident	on left bank	on left bank		f	m	s, cf	ar	Least Concern					x
286	Myrmotherula multostriata Sclater, 1858	MPEG 1907 (Arumateua), 1910 (Igarape Pai Lourenco), 1912 (Arumateua), 1984 (Tucurui, left bank, Jacunda)	PIAF 1984		XC402857 - TD, XC402856 - TD (Itupiranga)	resident	on both banks			f	u	s, uf	ar	Least Concern
287	Myrmotherula axillaris (Vieillot, 1817)	MPEG 1907 (Arumateua), 1910 (Baiao and Igarape Pirinum), 1911 (Cameta and Igarape Itacuna), 1912 (Arumateua), 1916 (Cameta, Fazenda Vaicajo), 1978 (Tucurui, left bank, Sitio Calandrini), 1984 (Tucurui, left bank, Cocal, Jacunda and Rio Arapari/Rio Pucurui, right bank, Canoal, and Ilha Tocantins); AMNH 1931 (Baiao and Ilha do Taiuna)	PIAF 1984	Pc, Mn, Qs	WA1184591 - IT (Goianesia), XC400666 - GL (Novo Repartimento)	resident (confirmed breeding activity)	on both banks	on both banks	Tape-recorded/Photographed	f, sg	u, tf, ef	s	ar	Least Concern
288	Myrmotherula longipennis Pelzeln, 1868	MPEG 1984 (Tucurui, left bank, Igarape Saude, Jacunda, Vale do Caraipe, and Ilha Tocantins)	PIAF 1984	Pc, Mn, Qs	XC9436 - SD, XC5155 - SD (UHE Tucurui Reservoir), WA1184591 - IT (Goianesia), S63290895 - DA, S63631389 - DF, S63291446 - FF (Tucurui)	resident	on both banks	on both banks	Tape-recorded/Photographed (after capture by mistnet)	f	u	s, uf	ar	Least Concern
289	Myrmotherula menetriesii (d'Orbigny, 1837)	MPEG 1907 (Alcobaca [=Tucurui]), 1910 (Baiao and Ilha Pirunum), 1911 (Cameta), 1912 (Arumateua), 1978 (Tucurui, left bank, Sitio Calandrini), 1984 (Tucurui, right bank,Canoal, and Ilha Tocantins); AMNH 1912 (Mazagao), 1931 (Baiao); FMNH 1986 (Maraba)	PIAF 1984	Pc, Mn, Qs	WA3223262 - DF (Tucurui)	resident	on both banks	on both banks	Tape-recorded/Photographed	f	u, m	s, uf	ar	Least Concern
290	Formicivora grisea (Boddaert, 1783)	MPEG 1907 (Arumateua), 1910 (Baiao, Igarape Boca do Manapiri and Igarape Pai Lourenco), 1911 (Cameta), 1912 (Arumateua), 1916 (Cameta, Fazenda Vaicajo), 1978 (Tucurui, left bank, Sitio Calandrini), 1984 (Tucurui, left bank, Jacunda and Igarape Saude, and right bank, Canoal, and Ilha Tocantins); AMNH 1931 (Baiao and Mocajuba)	PIAF 1984; Operação Curupira 1984	Pc, Mn, Bc, Qs	WA3256802 - JV (Tucurui), S63203184, S63290895, S63339186, S63464378 - DA, S63631389, S63339186, S63631381 - DF, S63203209, S63291446, S63339866, S63472212 - FF,	resident (confirmed breeding activity)	on both banks	on both banks	Tape-recorded/Photographed (after capture by mistnet)	sg	u	s	ar	Least Concern
291	Isleria hauxwelli (Sclater, 1857)	MPEG 1910 (Baiao), 1911 (Cameta), 1912 (Arumateua and Mazagao), 1916 (Cameta, Fazenda Vaicajo), 1984 (Tucurui, right bank, Canoal, and left bank, Cocal, Jacunda, Igarape Saude, Vale do Caraipe and Vila Temporaria)	PIAF 1984	Pc, Mn, Qs	XC7226 - SD (UHE Tucurui Reservoir), WA2224881 - AG, WA2218063 - AG, XC400480 - GL, XC213027 - GL (Novo Repartimento)	resident (confirmed breeding activity)	on both banks	on both banks	Tape-recorded/Photographed (after capture by mistnet)	f	u	s, uf	ar	Least Concern
292	Thamnomanes caesius (Temminck, 1820)	MPEG 1907 (Arumateua), 1910 (Baiao), 1911 (Cameta), 1916 (Cameta, Fazenda Vaicajo), 1978 (Tucurui, left bank, Sitio Calandrini), 1984 (Tucurui, left bank, Cocal, Jacunda, Vale do Caraipe, and right bank, Canoal, and Ilha Tocantins); AMNH 1911 (Cameta), 1931 (Baiao and Mocajuba)	PIAF 1984	Pc, Mn, Qs	WA2627610 - SD (Novo Repartimento), WA1179980 - IT (Goianesia), S63290895 - DA, S63631389 - DF, S63291446 - FF (Tucurui)	resident (confirmed breeding activity)	on both banks	on both banks	Tape-recorded/Photographed (after capture by mistnet)	f	u	s, uf	ar	Least Concern
293	Dysithamnus mentalis (Temminck, 1823)	MPEG 1910 (Baiao), 1912 (Mazagao), 1984 (Tucurui, right bank, Canoal); AMNH 1908 (Baiao), 1919 (Baiao), 1931 (Baiao)		Pc, Mn, Qs		resident (confirmed breeding activity)	on rigth bank	on rigth bank	Tape-recorded/Photographed (after capture by mistnet)	f	u	s, uf	ar	Least Concern				x
294	Herpsilochmus rufimarginatus (Temminck, 1822)	AMNH 1931 (Mocajuba)		Pc, Qs		resident	on both banks	on both banks	Tape-recorded	f	c, m	s, cf	ar	Least Concern
295	Sakesphorus luctuosus (Lichtenstein, 1823)	MPEG 1907 (Arumateua), 1910 (Igarape Pai Lourenco), 1912 (Arumateua), 1978 (Tucurui, left bank, Sitio Calandrini), 1984 (Tucurui, left bank, Jacunda, and rigth bank, Canoal); MCZ 1920 (Maraba); AMNH 1931 (Baiao)	PIAF 1984; Operação Curupira 1984		WA2892846 e WA3834121 - DF, WA3614696 - EF, S59204910, S66125685 - FB (Tucurui)	resident	on both banks			f	u	s, uf	ar	Least Concern
296	Thamnophilus doliatus (Linnaeus, 1764)				WA2519160 - RG, WA3648406 - DA (Tucurui), S63464378* - DA, S63631381 - DF, S63472212 - FF (Tucurui)	not expected, probably resident	not expected			f, sg	u	s	ar	Least Concern
297	Thamnophilus palliatus (Lichtenstein, 1823)	MPEG 1910 (Baiao), 1984 (Tucurui and Tucurui, right bank, Canoal)	PIAF 1984; Operação Curupira 1984	Pc, Qs	S63290895 - DA, S63631389 - DF, S63291446 - FF (Tucurui)	resident	on both banks	on rigth bank	Tape-recorded	sg	c, u	s	ar	Least Concern
298	Thamnophilus schistaceus d'Orbigny, 1835	MPEG 1907 (Arumateua and Alcobaca [=Tucurui]), 1912 (Arumateua), 1984 (Tucurui, left bank, Jacunda and Vale do Caraipe)	PIAF 1984	Pc, Mn, Qs	WA2224880 - AG, XC400649 - GL, XC400645 - GL (Novo Repartimento)	resident	on left bank	on left bank	Tape-recorded/Photographed (after capture by mistnet)	f	u	s	ar	Least Concern					x
299	Thamnophilus stictocephalus Pelzeln, 1868	MPEG 1911 (Cameta), 1912 (Cameta), 1916 (Cameta, Fazenda Vaicajo), 1978 (Tucurui, left bank, Sitio Calandrini), 1984 (Tucurui, left bank, Cocal, Jacunda, Igarape Saude, and Ilha Tocantins) ; AMNH 1911 (Cameta); MCZ 1920 (Sitio Floresta)	PIAF 1984	Pc, Mn, Qs	WA3233911 - DA, WA3241531 - DF, WA3392488 - EF (Tucurui), WA1434115 - GC, XC213039 - GL (Novo Repartimento), S63464378 - DA, S63631381 - DF, S63472212 - FF (Tucurui)	resident (confirmed breeding activity)	on left bank	on left bank	Tape-recorded/Photographed (after capture by mistnet)	f, sg	u	s	ar	Least Concern			x
300	Thamnophilus aethiops Sclater, 1858	MPEG 1910 (Baiao), 1912 (Arumateua), 1984 (Tucurui, right bank, Canoal)		Pc, Mn, Qs	XC400660 - GL (Novo Repartimento)	resident (confirmed breeding activity)	on both banks	on both banks	Tape-recorded/Photographed (after capture by mistnet)	f	u	s	ar	Least Concern
301	Thamnophilus amazonicus Sclater, 1858	MPEG 1907 (Arumateua), 1910 (Baiao), 1912 (Arumateua and Mazagao), 1978 (Tucurui, left bank, Sitio Calandrini); AMNH 1910 (Baiao); MCZ 1920 (Maraba)		Pc, Qs		resident	on both banks	on rigth bank	Tape-recorded/Photographed (after capture by mistnet)	f, sg	u	s, uf	ar	Least Concern
302	Cymbilaimus lineatus (Leach, 1814)	MPEG 1907 (Alcobaca [=Tucurui]), 1911 (Cameta), 1912 (Arumateua), 1978 (Tucurui, left bank, Sitio Calandrini); AMNH 1931 (Baiao and Mocajuba)		Pc, Qs	WA2224879 - AG (Novo Repartimento)	resident	on left bank	on left bank		f	u, m	s, uf	ar	Least Concern					x
303	Taraba major (Vieillot, 1816)	MPEG 1907 (Arumateua), 1984 (Tucurui, right bank, Canoal, and left bank, Vila Temporaria I and Base 3); AMNH 1931 (Baiao)	PIAF 1984	Pc, Qs	WA3228839 - DF (Tucurui), WA1633857 - GC (Novo Repartimento), S51858622, S51874251 - JV, S63339186 - DA, S63339186 - DF, S63339866 - FF, S66125685 -FB (Tucurui)	resident	on both banks	on rigth bank		sg	ef	s	ar	Least Concern
304	Hypocnemoides melanopogon (Sclater, 1857)	MPEG 1910 (Igarape Pirinum), 1911 (Igarape Itacuna), 1912 (Arumateua); AMNH 1910 (Pirinum), 1912 (Arumateua), 1931 (Baiao and Mocajuba)				resident	on both banks			w, f	u	s	ar	Least Concern
305	Hylophylax naevius (Gmelin, 1789)	MPEG 1911 (Cameta), 1912 (Arumateua), 1916 (Cameta, Fazenda Vaicajo), 1978 (Tucurui, left bank, Sitio Calandrini), 1984 (Tucurui, left bank, Cocal, Jacunda and Vale do Caraipe, and Ilha Tocantins )	PIAF 1984	Pc, Mn, Qs		resident	on left bank	on left bank		f	u	s	ar	Least Concern					x
306	Hylophylax punctulatus (Des Murs, 1856)	MPEG 1978 (Tucurui, left bank, Sitio Calandrini), 1984 (Tucurui, left bank, Vila Temporaria I)			WA2222578 - AG (Novo Repartimento)	resident	on left bank			w, f	u	s	ar	Least Concern					x
307	Sclateria naevia (Gmelin, 1788)	MPEG 1984 (Tucurui, right bank, Canoal); AMNH 1931 (Ilha do Taiuna)	PIAF 1984	Mn, Qs	WA2517359 - RG (Breu Branco), WA1503752 - CG (Novo Repartimento), WA1183089 - IT (Goianesia)	resident	on both banks	on rigth bank	Photographed (after capture by mistnet)	w, f	u	s	ar	Least Concern
308	Myrmelastes rufifacies (Hellmayr, 1929)	MPEG 1912 (Arumateua), 1916 (Cameta, Fazenda Vaicajo)				resident	on left bank			w, f	u	s	ar	Least Concern					x
309	Myrmoborus myotherinus (Spix, 1825)	MPEG 1907 (Arumateua and Alcobaca [=Tucurui]), 1911 (Cameta), 1912 (Arumateua), 1916 (Cameta, Fazenda Vaicajo), 1984 (Tucurui, left bank, Cocal, Jacunda and Vale do Caraipe); MCZ 1920 (Sitio Floresta); AMNH 1931 (Baiao and Mocajuba)	PIAF 1984	Pc, Mn, Qs		resident	on left bank	on left bank	Photographed (after capture by mistnet)	f	u	s	ar	Least Concern					x
310	Myrmoborus leucophrys (Tschudi, 1844)	MPEG 1907 (Arumateua), 1910 (Igarape Boca do Manapiri), 1912 (Arumateua), 1978 (Tucurui, left bank, Sitio Calandrini), 1984 (Tucurui, left bank, Cocal and Jacunda); AMNH 1907 (Arumateua), 1912 (Arumateua); MCZ 1920 (Maraba and Sitio Floresta)	PIAF 1984		WA3209108 - DF (Tucurui, S63464378 - DA, S63631381 - DF, S63472212 - FF (Tucurui)	resident	on left bank			f	u, ef	s	ar	Least Concern					x
311	Pyriglena leuconota (Spix, 1824)	MPEG 1911 (Cameta), 1912 (Arumateua), 1916 (Cameta, Fazenda Vaicajo), 1978 (Tucurui, left bank, Sitio Calandrini), 1984 (Tucurui, left bank, Cocal, Jacunda, Igarape Saude and Vale do Caraipe, and right bank, Canoal); AMNH 1911 (Cameta), 1931 (Baiao and Mocajuba); MCZ 1933 (Cameta)	PIAF 1984	Pc, Mn, Bc, Qs	WA2659847 - FA, XC213034 - GL (Novo Repartimento), S63218830, S63290895, S63464378 - DA, S63631395, S63631389, S63631381 - DF, S63218971, S63291446, S63472212 - FF (Tucurui)	resident	on both banks	on both banks	Tape-recorded/Photographed	f	u	af	ar	Least Concern
312	Cercomacra cinerascens (Sclater, 1857)	MPEG 1910 (Baiao), 1912 (Arumateua); AMNH 1931 (Baiao)		Pc, Qs	WA2624567 - SD, XC27084 - SD (UHE Tucurui Reservoir), WA3770215 - DA (Tucurui), WA2222584 - AG, WA1454195 - GC (Novo Repartimento), WA1179090 - IT (Goianesia)	resident	on both banks	on both banks	Tape-recorded	f	c, m	s	ar	Least Concern
313	Cercomacroides nigrescens (Cabanis & Heine, 1859)	MPEG 1910 (Igarape Boca do Manapiri), 1984 (Tucurui, left bank, Jacunda, Vila Temporaria I)	PIAF 1984	Pc, Mn, Bc, Qs	WA2224878 - AG, WA1600997 - GL, XC213012 - GL (Novo Repartimento)	resident	on left bank	on left bank	Tape-recorded	f, sg	tf, ef	s	ar	Least Concern					x
314	Cercomacroides laeta (Todd, 1920)	MPEG 1910 (Baiao), 1912 (Mazagao), 1984 (Tucurui, rigth bank, Canoal); AMNH 1931 (Baiao and Mocajuba)	PIAF 1984	Pc, Mn, Bc, Qs	WA3172343 e WA3161412 - LC (Tucurui)	resident (confirmed breeding activity)	on rigth bank	on rigth bank	Tape-recorded/Photographed	f, sg	tf, ef	s	ar	Least Concern				x
315	Hypocnemis striata (Spix, 1825)	MPEG 1907 (Arumateua), 1911 (Cameta), 1916 (Cameta, Campo de Pucurijo), 1984 (Tucurui, left bank, Cocal, Jacunda and Igarape Saude); AMNH 1910 (Pirinum), 1911 (Cameta), 1931 (Baiao)	PIAF 1984	Pc, Mn, Bc, Qs	WA2222544 - AG, XC213025 - GL, XC213023 - GL (Novo Repartimento)	resident	on left bank	on left bank	Tape-recorded/Photographed (after capture by mistnet)	f	ef, tf	s	ar	Near threatened					x
316	Willisornis vidua (Hellmayr, 1905)	MPEG 1910 (Baiao), 1911 (Cameta), 1912 (Arumateua), 1916 (Cameta, Fazenda Vaicajo), 1978 (Tucurui, left bank, Sitio Calandrini), 1984 (Tucurui, left bank, Cocal, Jacunda, Igarape Saude, Vale do Caraipe, and right bank, Canoal); AMNH 1912 (Arumateua), 1931 (Baiao and Mocajuba)	PIAF 1984	Pc, Mn, Qs	XC27085 - SD (UHE Tucurui Reservoir), WA2218139 - AG, XC213042 - GL, XC400647 - GL (Novo Repartimento)	resident	on both banks	on both banks	Photographed (after capture by mistnet)	f	u	s, af	ar	Least Concern
317	Phlegopsis nigromaculata (d'Orbigny & Lafresnaye, 1837)	MPEG 1911 (Cameta), 1916 (Cameta, Fazenda Vaicajo), 1978 (Tucurui, left bank, Sitio Calandrini), 1984 (Tucurui, left bank, Jacunda and Igarape Saude, and right bank, Canoal); AMNH 1931 (Baiao and Mocajuba)	PIAF 1984	Pc, Mn, Qs		resident (confirmed breeding activity)	on both banks	on left bank		f	u	s, af	ar	Least Concern	VU - subspecie "paraensis" on right bank and subspecie "confinis" on left bank
318	CONOPOPHAGIDAE
319	Conopophaga aurita (Gmelin, 1789)	MPEG 1911 (Cameta), 1916 (Cameta, Fazenda Vaicajo), 1984 (Tucurui, left bank, Cocal, Jacunda, Igarape Saude and Vale do Caraipe)	PIAF 1984	Pc, Mn, Qs	WA3226980 - DF, WA3220518 - DA (Tucurui), WA2218143 - AG (Novo Repartimento)	resident	on left bank	on left bank	Photographed (after capture by mistnet)	f	u, t	s	ar	Least Concern					x
320	Conopophaga roberti Hellmayr, 1905	MPEG 1910 (Baiao), 1984 (Tucurui, right bank, Jacundazinho); AMNH 1931 (Baiao and Mocajuba)	PIAF 1984	Pc, Mn, Qs	XC27205 - SD (UHE Tucurui Reservoir), WA1165966 - NM (Goianesia)	resident	on rigth bank	on rigth bank	Tape-recorded/Photographed (after capture by mistnet)	f	u, t	s	ar	Least Concern		x
321	Conopophaga melanogaster Ménétriès, 1835	MPEG 1912 (Arumateua); AMNH 1912 (Arumateua)				resident	on left bank			f	u, t	s	ar	Least Concern					x
322	GRALLARIIDAE
323	Grallaria varia (Boddaert, 1783)			Pc, Qs	XC170618 - SD (UHE Tucurui Reservoir), WA1887495 - LF, XC400407 - GL (Novo Repartimento)	resident	on both banks	on left bank	Tape-recorded	f	u, t	s	ar	Least Concern	VU - subspecie "distincta"
324	Hylopezus paraensis Snethlage, 1910			Pc, Qs	WA1162123 - AL, XC155520 - AL (Goianesia), XC400478 - GL (Novo Repartimento)	resident	on both banks	on both banks	Tape-recorded	f	t	s	ar	Least Concern	VU
325	Hylopezus berlepschi (Hellmayr, 1903)	MPEG 1984 (Tucurui, left bank, Vila Temporaria I)			WA2627615 - SD (Novo Repartimento)	resident	on left bank			sg	t, ef	s	ar	Least Concern					x
326	FORMICARIIDAE
327	Formicarius colma Boddaert, 1783	MPEG 1907 (Alcobaca [=Tucurui]), 1911 (Cameta), 1912 (Alcobaca [=Tucurui] and Arumateua), 1916 (Cameta, Fazenda Vaicajo), 1984 (Tucurui, left bank, Jacunda, and Ilha Tocantins) ; AMNH 1912 (Arumateua); MCZ 1920 (Sitio Floresta)	PIAF 1984	Pc, Qs		resident	on both banks	on both banks		f	t	s	ar	Least Concern
328	Formicarius analis (d'Orbigny & Lafresnaye, 1837)	MPEG 1907 (Arumateua), 1910 (Baiao), 1912 (Arumateua), 1978 (Tucurui, left bank, Sitio Calandrini), 1984 (Tucurui, left bank, Cocal and Jacunda, and right bank, Canoal), 1985 (Tucurui, left bank, Fazendas Reunidas); AMNH 1910 (Baiao), 1912 (Arumateua)		Pc, Mn, Qs	XC213020 - GL (Novo Repartimento)	resident	on both banks	on both banks	Photographed (after capture by mistnet)	f	t	s	ar	Least Concern
329	SCLERURIDAE
330	Sclerurus macconnelli Chubb, 1919	MPEG 1984 (Tucurui, left bank, Jacunda and Vale do Caraipe)		Qs		resident	on both banks	on left bank	Photographed (after capture by mistnet)	f	t	s	ar	Least Concern
331	Sclerurus rufigularis Pelzeln, 1868	MPEG 1911 (Cameta), 1984 (Tucurui, left bank, Jacunda and Vale do Caraipe); AMNH 1911 (Cameta)	PIAF 1984	Mn	XC213037 - GL (Novo Repartimento)	resident	on both banks	on both banks	Photographed (after capture by mistnet)	f	t	s	ar	Least Concern
332	Sclerurus caudacutus (Vieillot, 1816)	MPEG 1912 (Arumateua), 1984 (Tucurui, left bank, Jacunda and Ilha Tocantins)	PIAF 1984	Mn	XC400644 - GL (Novo Repartimento)	resident	on both banks	on left bank	Photographed (after capture by mistnet)	f	t	s	ar	Least Concern
333	DENDROCOLAPTIDAE
334	Dendrocincla fuliginosa (Vieillot, 1818)	MPEG 1907 (Alcobaca [=Tucurui]), 1911 (Cameta), 1916 (Cameta, Fazenda Vaicajo), 1978 (Tucurui, left bank, Sitio Calandrini), 1984 (Tucurui, left bank, Jacunda, Igarape Saude, Vale do Caraipe and Vila Temporaria I, and Ilha Tocantins); AMNH 1911 (Cameta)	PIAF 1984	Pc, Mn, Bc, Qs	WA40691 - SD (UHE Tucurui Reservoir), S63290895 - DA, S63631389 - DF, S63291446 - FF (Tucurui)	resident	on both banks	on both banks	Tape-recorded/Photographed	f, sg	u, m	s, uf, af	ar	Least Concern
335	Dendrocincla merula (Lichtenstein, 1829)	MPEG 1984 (Tucurui, left bank, Jacunda, Igarape Saude and Vale do Caraipe)	PIAF 1984	Mn, Qs	WA2222540 - AG, WA1434135 - GC (Novo Repartimento)	resident	on both banks	on left bank	Photographed (after capture by mistnet)	f	u	s, af	ar	Least Concern	VU - subspecie "badia" on right bank
336	Deconychura longicauda (Pelzeln, 1868)	MPEG 1984 (Tucurui, left bank, Jacunda)	PIAF 1984	Mn	WA1181928 - IT (Goianesia)	resident	on both banks	on rigth bank	Photographed (after capture by mistnet)	f	u	s, uf	ar	Near threatened
337	Sittasomus griseicapillus (Vieillot, 1818)	MPEG 1907 (Arumateua)		Pc, Mn, Qs	XC5733 - SD (UHE Tucurui Reservoir)	resident	on left bank	on left bank	Tape-recorded/Photographed (after capture by mistnet)	f	u	s, uf	ar	Least Concern
338	Certhiasomus stictolaemus (Pelzeln, 1868)	MPEG 1984 (Tucurui, left bank, Jacunda)	PIAF 1984	Mn, Qs		resident	on both banks	on both banks	Photographed (after capture by mistnet)	f	u	s, uf	ar	Least Concern
339	Glyphorynchus spirurus (Vieillot, 1819)	MPEG 1910 (Baiao), 1911 (Cameta), 1984 (Tucurui, left bank, Cocal, Jacunda and Vale do Caraipe, and right bank, Canoal); AMNH 1931 (Baiao and Mocajuba)	PIAF 1984	Pc, Mn, Bc, Qs	WA16598 - SD (UHE Tucurui Reservoir), WA3267663 - JV, WA3729215 - MT (Tucurui), S63218830, S63290895, S63464378 - DA, S63631395, S63631389, S63631381 - DF, S63218971, S63291446, S63472212 - FF (Tucurui)	resident (confirmed breeding activity)	on both banks	on both banks	Tape-recorded/Photographed	f, sg	u, m	s, uf	ar	Least Concern
340	Xiphorhynchus spixii (Lesson, 1830)	MPEG 1910 (Baiao), 1912 (Arumateua), 1916 (Cameta, Fazenda Vaicajo), 1984 (Tucurui, left bank, Jacunda and Vale do Caraipe, and right bank, Canoal, and Ilha Tocantins)	PIAF 1984	Pc, Mn, Qs	XC7196 - SD (UHE Tucurui Reservoir), WA2222541 - AG (Novo Repartimento)	resident	on both banks	on both banks	Tape-recorded/Photographed (after capture by mistnet)	f	u, m	s, uf	ar	Least Concern
341	Xiphorhynchus obsoletus (Lichtenstein, 1820)	MPEG 1907 (Arumateua), 1910 (Igarape Boca do Manapiri and Igarape Pirinum), 1912 (Arumateua), 1978 (Tucurui, left bank, Sitio Calandrini), 1985 (Tucurui); AMNH 1910 (Pirinum)				resident	on both banks			w, f	u, ef	s, uf	ar	Least Concern
342	Xiphorhynchus guttatoides (Lafresnaye, 1850)	MPEG 1910 (Baiao), 1911 (Cameta), 1912 (Arumateua and Mazagao), 1916 (Cameta, Fazenda Vaicajo), 1984 (Tucurui, left bank, Jacunda, and right bank, Canoal, and Ilha Tocantins), 1985 (Tucurui, left bank, Fazendas Reunidas), 1988 (Tucurui); AMNH 1912 (Mazagao)	PIAF 1984	Pc, Mn, Bc, Qs	XC4761 - SD (UHE Tucurui Reservoir), WA2069375 - FR, WA1277285 - GC, XC400648 - GL (Novo Repartimento), S63290895 - DA, S63631389 - DF, S63291446 - FF (Tucurui)	resident	on both banks	on both banks	Tape-recorded/Photographed (after capture by mistnet)	f	c, m	s, uf	ar	Least Concern
343	Campylorhamphus multostriatus (Snethlage, 1907)	MPEG 1907 (Arumateua), 1912 (Arumateua), 1984 (Tucurui, left bank, Igarape Saude)	PIAF 1984		WA2659819 - FA, XC213010 - GL, XC395936 - FA, XC388516 - FA, XC381543 - SD (Novo Repartimento)	resident	on left bank			f	c, m	s, uf	ar	Least Concern	VU		x
344	Dendroplex picus (Gmelin, 1788)	MPEG 1907 (Arumateua), 1910 (Baiao and Igarape Boca do Manapiri), 1911 (Cameta and Ilha Pararu), 1978 (Tucurui, left bank, Sitio Calandrini), 1984 (Tucurui, left bank, Cocal, Jacunda and Vila Temporaria I ), 1985 (Tucurui)	PIAF 1984	Pc, Mn, Bc, Qs	WA2810454 - DF, WA1835845 - DF, WA3237941 - DA (Tucurui), WA2004130 - IT (Goianesia), S59204910 - FB, S63203184, S63218830, S63290895 - DA, S63631395, S63631389 - DF, S63203209, S63218971, S63291446 - FF (Tucurui)	resident	on both banks	on both banks	Tape-recorded/Photographed (after capture by mistnet)	sg, w	ef, m	s, uf	ar	Least Concern
345	Lepidocolaptes angustirostris (Vieillot, 1818)				WA3028723 - LF (Tucurui)	not expected, unknown status	not expected					uf	ar
346	Lepidocolaptes layardi (Sclater, 1873)	MPEG 1911 (Cameta), 1984 (Tucurui); AMNH 1911 (Cameta)		Pc, Mn, Bc, Qs	WA2768696 - SD, XC5694 - SD(UHE Tucurui Reservoir), WA2224885 - AG (Novo Repartimento), WA1162102 - AL (Goianesia)	resident	on both banks	on both banks	Tape-recorded/Photographed	f	c	s, cf	ar	Least Concern
347	Nasica longirostris (Vieillot, 1818)	MPEG 1912 (Arumateua); AMNH 1931 (Baiao)				resident	on both banks			f	c	s	ar	Least Concern
348	Dendrexetastes rufigula (Lesson, 1844)			Pc, Qs	WA2625452 - SD (Novo Repartimento)	resident	on both banks	on both banks	Tape-recorded	f	c, m, ef	s	ar	Least Concern	EN - subspecie "paraensis" on rigth bank
349	Dendrocolaptes retentus Batista, Aleixo, Vallinoto, Azevedo, Rêgo, Silveira, Sampaio & Schneider, 2013	MPEG 1911 (Cameta), 1912 (Arumateua), 1916 (Cameta, Fazenda Vaicajo), 1984 (Tucurui, left bank, Jacunda)	PIAF 1984	Pc, Mn, Qs	S63464378 - DA, S63631381 - DF, S63472212 - FF (Tucurui)	resident	on left bank	on left bank	Tape-recorded	f	m	s, af	ar	Least Concern	VU		x
350	Dendrocolaptes medius Todd, 1920	MPEG 1984 (Tucurui, right bank, Canoal)	PIAF 1984	Pc, Mn, Qs	XC7149 - SD (UHE Tucurui Reservoir)	resident	on rigth bank	on rigth bank	Tape-recorded	f	m	s, af	ar	Least Concern	VU	x
351	Hylexetastes brigidai Silva, Novaes & Oren, 1996	MPEG 1984 (Tucurui, left bank, Jacunda and Vale do Caraipe)	PIAF 1984	Pc, Mn, Qs	XC18597 - SD (UHE Tucurui Reservoir), WA2858657 - GL, XC400477 - GL (Novo Repartimento)	resident	on left bank	on left bank		f	m	s, af	ar	Vulnerable	VU		x
352	XENOPIDAE
353	Xenops minutus (Sparrman, 1788)	MPEG 1907 (Arumateua), 1911 (Cameta), 1912 (Arumateua), 1984 (Tucurui, left bank, Cocal, Jacunda, Igarape Saude and Vale do Caraipe, and right bank, Canoal); AMNH 1911 (Cameta), 1931 (Baiao and Mocajuba)	PIAF 1984	Pc, Mn, Qs	WA3239904 - DF (Tucurui)	resident	on both banks	on both banks	Tape-recorded/Photographed (after capture by mistnet)	f, sg	u, m	s, uf	ar	Least Concern
354	FURNARIIDAE
355	Automolus rufipileatus (Pelzeln, 1859)	MPEG 1910 (Baiao), 1984 (Tucurui, left bank, Jacunda); AMNH 1931 (Baiao)	PIAF 1984			resident	on both banks			f	u	s	ar	Least Concern
356	Automolus paraensis Hartert, 1902	MPEG 1910 (Baiao), 1911 (Cameta), 1912 (Arumateua), 1984 (Tucurui, left bank, Cocal, Jacunda, Igarape Saude and Vale do Caraipe, and right bank, Canoal, and Ilha Tocantins); AMNH 1911 (Cameta)	PIAF 1984	Pc, Mn, Qs	XC4764 - SD (UHE Tucurui Reservoir), WA2858616 - GL, XC400655 - GL, XC213009 - GL (Novo Repartimento), WA1183087 - IT (Goianesia)	resident (confirmed breeding activity)	on both banks	on both banks	Tape-recorded/Photographed (after capture by mistnet)	f	u	s, uf	ar	Least Concern
357	Anabacerthia ruficaudata (d'Orbigny & Lafresnaye, 1838)	MPEG 1912 (Arumateua)			WA2628536 - SD (Novo Rpartimento), WA2222538 - AG (Novo Repartimento)	resident	on both banks			f	u, m, c	s, uf	ar	Least Concern
358	Philydor erythrocercum (Pelzeln, 1859)	MPEG 1912 (Arumateua), 1984 (Tucurui, left bank, Jacunda), 1985 (Tucurui, left bank, Fazendas Reunidas); MCZ 1920 (Rio Tocantins)		Pc, Mn, Qs	XC10952 - SD, XC7240 - SD (UHE Tucurui Reservoir), WA2222549 - AG (Novo Repartimento), WA1181926 - IT, WA1164793 - NM, WA1162098 - AL (Goianesia)	resident (confirmed breeding activity)	on both banks	on both banks	Tape-recorded/Photographed (after capture by mistnet)	f	u	s, uf	ar	Least Concern
359	Philydor pyrrhodes (Cabanis, 1848)	MPEG 1912 (Arumateua), 1984 (Tucurui, left bank, Cocal, and right bank, Canoal and Ilha Tocantins); AMNH 1931 (Mocajuba)	PIAF 1984		WA2222571 - AG (Novo Repartimento)	resident	on both banks			f	u	s	ar	Least Concern
360	Certhiaxis cinnamomeus (Gmelin, 1788)	MPEG 1910 (Igarape Pai Lourenco and Igarape Pirinum), 1912 (Arumateua), 1984 (Maraba)				resident	on both banks			w, sg	ef, tf	s	ar	Least Concern
361	Synallaxis albescens Temminck, 1823			Bc, Qs	WA3218624 - DA (Tucurui), WA2117831 - AC (Novo Repartimento), WA146267 - GSe (Goianesia), XC402860 - TD (Itupiranga), S63290895 - DA, S63631389 - DF, S63291446 - FF (Tucurui)	resident (confirmed breeding activity)	on both banks	on left bank	Photographed	sg	ef	s	ar	Least Concern
362	Synallaxis rutilans Temminck, 1823	MPEG 1907 (Arumateua), 1910 (Baiao), 1911 (Cameta), 1912 (Arumateua), 1916 (Cameta, Fazenda Vaicajo), 1984 (Tucurui, left bank, Cocal and Jacunda, and right bank, Canoal); AMNH 1911 (Cameta), 1931 (Baiao and Mocajuba)	PIAF 1984	Pc, Mn, Qs	XC20638 - SD (UHE Tucurui Reservoir)	resident	on both banks	on both banks	Tape-recorded/Photographed (after capture by mistnet)	f	u	s, uf	ar	Least Concern
363	Synallaxis gujanensis (Gmelin, 1789)	MPEG 1907 (Arumateua), 1910 (Igarape Pai Lourenco and Igarape Pirinum), 1978 (Tucurui, left bank, Sitio Calandrini), 1984 (Tucurui, left bank, Vila Temporaria I, and right bank, Canoal); AMNH 1910 (Lourenco and Pirinum)	PIAF 1984	Bc, Qs	WA3255050 - JV (Tucurui), XC402861 - TD (Itupiranga), S51874251* - JV, S63290895, S63339186 - DA, S63631389, S63339186 - DF, S63291446, S63339866 - FF (Tucurui)	resident	on both banks	on rigth bank		sg	ef	s	ar	Least Concern
364	Cranioleuca vulpina (Pelzeln, 1856)	MPEG 1907 (Arumateua), 1910 (Igarape Pai Lourenco and Pirinum), 1912 (Arumateua), 1984 (Tucurui, right bank, Canoal); AMNH 1910 (Pirinum); MCZ 1920 (Maraba)	PIAF 1984		WA3254363 - JV (Tucurui), XC402853 - TD (Itupiranga), S51858622* - JV (Tucurui)	resident	on both banks			w, sg	ef, c	s	ar	Least Concern
365	PIPRIDAE
366	Tyranneutes stolzmanni (Hellmayr, 1906)	MPEG 1911 (Cameta), 1916 (Cameta, Fazenda Vaicajo), 1984 (Tucurui, Ilha Tocantins); AMNH 1931 (Baiao and Mocajuba)		Pc, Qs	WA14600 - SD (UHE Tucurui Reservoir)	resident	on both banks	on both banks	Tape-recorded/Photographed	f	m	s	om	Least Concern
367	Pipra fasciicauda Hellmayr, 1906	MPEG 1907 (Arumateua), 1910 (Igarape Pirinum), 1912 (Arumateua), 1978 (Tucurui, left bank, Sitio Calandrini), 1984 (Tucurui, left bank, Cocal, Jacunda and Igarape Saude, and right bank, Canoal, and Ilha Tocantins); AMNH 1912 (Arumateua)	PIAF 1984	Pc, Mn, Qs	WA2810421 - DF, WA3232667 - DA (Tucurui), WA2628535 - SD, WA2222580 - AG, WA1440040 - GC, XC400664 - GL (Novo Repartimento)	resident (confirmed breeding activity)	on both banks	on both banks	Tape-recorded/Photographed (after capture by mistnet)	f	u	s, l	fr	Least Concern
368	Ceratopipra rubrocapilla (Temminck, 1821)	MPEG 1907 (Arumateua), 1910 (Baiao), 1911 (Cameta), 1912 (Arumateua), 1916 (Cameta, Fazenda Vaicajo), 1978 (Tucurui, left bank, Sitio Calandrini), 1984 (Tucurui, left bank, Jacunda and Igarape Saude, and right bank, Canoal); AMNH 1910 (Baiao), 1912 (Arumateua)	PIAF 1984	Pc, Mn, Qs	WA2212716 - GC (Novo Repartimento), S63290895 - DA, S63631389 - DF, S63291446 - FF (Tucurui)	resident	on both banks	on both banks	Photographed (after capture by mistnet)	f	u, m	s, l	fr	Least Concern
369	Lepidothrix iris (Schinz, 1851)	MPEG 1984 (Tucurui, left bank, Jacunda, and right bank, Canoal)	PIAF 1984	Pc, Mn, Qs	XC8784 - SD (UHE Tucurui Reservoir)	resident	on both banks	on rigth bank	Tape-recorded/Photographed (after capture by mistnet)	f	u, tf	s, l	fr	Vulnerable	EN
370	Manacus manacus (Linnaeus, 1766)	MPEG 1910 (Baiao), 1911 (Cameta), 1912 (Arumateua), 1916 (Cameta, Fazenda Vaicajo), 1984 (Tucurui, left bank, Cocal); AMNH 1931 (Baiao and Mocajuba)	PIAF 1984			resident	on both banks			sg, f	u	s, l	fr	Least Concern
371	Dixiphia pipra (Linnaeus, 1758)	MPEG 1910 (Baiao), 1911 (Cameta), 1916 (Cameta, Fazenda Vaicajo), 1984 (Tucurui, left bank, Jacunda, Igarape Saude and Vale do Caraipe, and right bank, Canoal); MCZ 1920 (Maraba)	PIAF 1984	Pc, Mn, Qs	WA2768699 - SD (UHE Tucurui Reservoir), WA2001545 - FR (Novo Repartimento)	resident	on both banks	on both banks	Photographed	f	m	s, l	fr	Least Concern
372	Chiroxiphia pareola (Linnaeus, 1766)	MPEG 1910 (Baiao), 1911 (Cameta), 1912 (Arumateua and Mazagao), 1916 (Cameta, Fazenda Vaicajo); AMNH 1911 (Cameta), 1931 (Baiao and Mocajuba)				resident	on both banks			f, sg	u, m	s, l	fr	Least Concern
373	ONYCHORHYNCHIDAE
374	Onychorhynchus coronatus (Statius Muller, 1776)	MPEG 1911 (Cameta), 1912 (Arumateua), 1916 (Cameta), 1984 (Tucurui, left bank, Cocal and Jacunda, and right bank, Canoal, and Ilha Tocantins)	PIAF 1984	Pc, Mn, Qs		resident	on both banks	on both banks	Tape-recorded/Photographed (after capture by mistnet)	f	u	s, uf	ar	Least Concern
375	Terenotriccus erythrurus (Cabanis, 1847)	MPEG 1910 (Igarape Boca do Manapiri, Igarape Pirinum and Baiao), 1911 (Cameta); AMNH 1911 (Cameta)		Mn, Qs	S63464378 - DA, S63631381 - DF, S63472212 - FF (Tucurui)	resident	on both banks	on rigth bank	Photographed (after capture by mistnet)	f	m, u	s, uf	ar	Least Concern
376	Myiobius barbatus (Gmelin, 1789)	MPEG 1907 (Arumateua), 1910 (Baiao), 1911 (Cameta), 1912 (Arumateua), 1916 (Cameta, Fazenda Vaicajo), 1984 (Tucurui, left bank, Jacunda and Vale do Caraipe)	PIAF 1984	Mn, Qs		resident	on both banks	on rigth bank	Photographed (after capture by mistnet)	f	u	s, uf	ar	Least Concern
377	Myiobius atricaudus Lawrence, 1863	MPEG 1984 (Tucurui, right bank, Canoal and Jacundazinho)				resident	on both banks			f	u	s, uf	ar	Least Concern
378	TITYRIDAE
379	Schiffornis turdina (Wied, 1831)	MPEG 1911 (Cameta), 1912 (Alcobaca [=Tucurui]), 1978 (Tucurui, left bank, Sitio Calandrini), 1984 (Tucurui, left bank, Jacunda, and right bank, Canoal, and Ilha Tocantins); AMNH 1931 (Baiao)	PIAF 1984	Pc, Mn, Qs		resident	on both banks	on both banks	Photographed (after capture by mistnet)	f	u	s	ar	Least Concern
380	Laniocera hypopyrra (Vieillot, 1817)	MPEG 1907 (Arumateua), 1912 (Arumateua), 1916 (Cameta); AMNH 1931 (Baiao and Mocajuba)		Mn		resident	on both banks	on rigth bank	Photographed (after capture by mistnet)	f	m	s	om	Least Concern
381	Iodopleura isabellae Parzudaki, 1847	MPEG 1911 (Cameta), 1912 (Alcobaca [=Tucurui]); AMNH 1912 (Alcobaca [=Tucurui]), 1931 (Mocajuba)			WA1834271 - DF (Tucurui)	resident	on both banks			f	c, ef	s	fr	Least Concern
382	Tityra inquisitor (Lichtenstein, 1823)			Pc, Qs		resident	on both banks	on rigth bank		f	c	s	om	Least Concern
383	Tityra semifasciata (Spix, 1825)	MPEG 1912 (Arumateua)		Bc, Qs	WA1277272 - GC (Novo Repartimento)	resident	on both banks	on left bank	Photographed	f	c	s	om	Least Concern
384	Pachyramphus viridis (Vieillot, 1816)	MPEG 1985 (Tucurui, right bank, Base 4)				resident	on both banks			sg	ef, tf	s	om	Least Concern				x
385	Pachyramphus rufus (Boddaert, 1783)	MPEG 1912 (Arumateua), 1978 (Tucurui, left bank, Sitio Calandrini), 1985 (Tucurui); MCZ 1920 (Maraba)	PIAF 1984		WA931956 - RG, WA2829043 - LF, WA3209093 - DF, WA3745082 - DA (Tucurui), WA2222545 - AG (Novo Repartimento), XC402858 - TD (Itupiranga), S63339186 - DA, S63339186 - DF, S63339866 - FF	resident	on both banks			sg	ef, tf	s	om	Least Concern
386	Pachyramphus castaneus (Jardine & Selby, 1827)	MPEG 1910 (Igarape Pirinum)		Pc, Qs		resident	on both banks	on both banks	Tape-recorded	f	ef, tf	s	om	Least Concern
387	Pachyramphus polychopterus (Vieillot, 1818)	MPEG 1910 (Igarape Pirinum), 1911 (Cameta), 1912 (Arumateua); AMNH 1912(Arumateua)		Bc, Qs	WA1434116 - GC (Novo Repartimento)	migrant	on both banks	on left bank		sg, f	ef, tf	s	om	Least Concern
388	Pachyramphus marginatus (Lichtenstein, 1823)	MPEG 1912 (Mazagao); AMNH 1912 (Mazagao)		Pc, Qs	WA2567008 - SD, XC16501 - SD (UHE Tucurui Reservoir)	resident	on both banks	on both banks	Tape-recorded/Photographed	f	m	s	om	Least Concern
389	Pachyramphus minor (Lesson, 1830)	MPEG 1907 (Arumateua), 1910 (Baiao), 1912 (Arumateua), 1916 (Cameta)		Pc	WA2222581 - AG (Novo Repartimento)	resident	on both banks	on left bank		f	c, m	s	ar	Least Concern
390	Pachyramphus validus (Lichtenstein, 1823)			Qs	WA931917 - SD (UHE Tucurui Reservoir), WA3770209 - DA (Tucurui)	resident (confirmed breeding activity)	on both banks	on left bank	Photographed	f	c, m	s	ar	Least Concern
391	COTINGIDAE
392	Phoenicircus carnifex (Linnaeus, 1758)	MPEG 1907 (Arumateua), 1912 (Arumateua), 1916 (Cameta, Fazenda Vaicajo); AMNH 1907 (Arumateua), 1912 (Arumateua)				resident	on both banks			f	c, m	s, l	fr	Least Concern
393	Querula purpurata (Statius Muller, 1776)	AMNH 1931 (Baiao)		Pc	WA1474016 - GC (Novo Repartimento), S63218830, S63290895 - DA, S63631395, S63631389 - DF, S63291446, S63218971 - FF (Tucurui)	resident	on both banks	on both banks	Tape-recorded	f	c, ef	mf	om	Least Concern
394	Lipaugus vociferans (Wied, 1820)	MPEG 1912 (Mazagao), 1916 (Cameta, Fazenda Vaicajo), 1984 (Tucurui, left bank, Jacunda and Igarape Saude, and Ilha Tocantins); MCZ 1920 (Sitio Floresta); AMNH 1931 (Baiao and Mocajuba)	PIAF 1984	Pc, Mn, Bc, Qs	WA2001544 - FR, WA2120107 - AC (Novo Repartimento), WA1167077 - NM (Goianesia), S63290895, S63464378 - DA, S63631389, S63631381 - DF, S63291446, S63472212 - FF (Tucurui)	resident	on both banks	on both banks	Tape-recorded/Photographed (after capture by mistnet)	f	m	s, l	om	Least Concern
395	Gymnoderus foetidus (Linnaeus, 1758)	AMNH 1931 (Baiao)		Pc, Qs	WA2947947 - DF (Tucurui)	resident	on both banks	on rigth bank		w, f	c	s, l	om	Least Concern
396	PIPRITIDAE
397	Piprites chloris (Temminck, 1822)			Pc, Qs	XC6596 - SD (UHE Tucurui Reservoir), WA2069377 - FR (Novo Repartimento), WA1179093 - IT, WA1165957 - NM, WA1162100 - AL (Goianesia)	resident	on both banks	on rigth bank	Tape-recorded	f	c, m	s, cf	ar	Least Concern	VU - subspecie "grisescens" on right bank
398	PLATYRINCHIDAE
399	Platyrinchus saturatus Salvin & Godman, 1882	MPEG 1984 (Tucurui, left bank, Jacunda)	PIAF 1984	Mn, Qs		resident	on both banks	on rigth bank	Photographed (after capture by mistnet)	f	m, u	s	ar	Least Concern
400	Platyrinchus platyrhynchos (Gmelin, 1788)	MPEG 1912 (Alcobaca[=Tucurui]), 1984 (Tucurui, left bank, Jacunda, and Ilha Tocantins)	PIAF 1984	Pc, Mn, Qs		resident	on both banks	on both banks	Photographed	f	u, m	s, l	ar	Least Concern
401	RHYNCHOCYCLIDAE
402	Taeniotriccus andrei (Berlepsch & Hartert, 1902)	MPEG 1978 (Tucurui, left bank, Sitio Calandrini), 1984 (Tucurui, left bank, Igarape Saude)	PIAF 1984	Qs	WA3652638 - DF, WA3770251 - DA (Tucurui), XC155515 - AL (Goianesia)	resident	on both banks		Photographed	f, sg	ef	s	ar	Least Concern
403	Mionectes oleagineus (Lichtenstein, 1823)	MPEG 1907 (Arumateua), 1912 (Arumateua), 1978 (Tucurui, left bank, Sitio Calandrini), 1984 (Tucurui, left bank, Cocal, Jacunda, Igarape Saude); AMNH 1911 (Cameta)	PIAF 1984	Pc, Mn, Qs		resident	on both banks	on both banks	Photographed (after capture by mistnet)	f, sg	u	s	om	Least Concern
404	Mionectes macconnelli (Chubb, 1919)	MPEG 1907 (Arumateua), 1911 (Cameta), 1912 (Arumateua), 1916 (Cameta, Fazenda Vaicajo), 1984 (Tucurui, left bank, Jacunda and Vale do Caraipe, and right bank, Canoal, and Ilha Tocantins)	PIAF 1984	Mn, Qs	WA2001546 - FR (Novo Repartimento), WA1181860 - IT (Goianesia)	resident	on both banks	on both banks	Photographed (after capture by mistnet)	f, sg	u	s, l	om	Least Concern
405	Leptopogon amaurocephalus Tschudi, 1846			Mn, Qs		not expected, probably resident	not expected	on both banks	Photographed	f, sg	u	s	om	Least Concern
406	Corythopis torquatus Tschudi, 1844	MPEG 1984 (Tucurui, left bank, Jacunda)				resident	on both banks			f	u, t	s	ar	Least Concern
407	Rhynchocyclus olivaceus (Temminck, 1820)	MPEG 1984 (Tucurui, right bank, Canoal)	PIAF 1984	Pc, Mn, Qs	XC5153 - SD, XC20643 - SD (UHE Tucurui Reservoir)	resident	on both banks	on both banks	Tape-recorded/Photographed (after capture by mistnet)	f	m	s, uf	ar	Least Concern
408	Tolmomyias sulphurescens (Spix, 1825)	MPEG 1907 (Arumateua), 1910 (Baiao); AMNH 1910 (Baiao), 1911 (Cameta)		Pc, Mn, Bc, Qs	XC4683 - SD (UHE Tucurui Reservoir), XC155518 - AL (Goianesia)	resident (confirmed breeding activity)	on both banks	on both banks	Tape-recorded/Photographed (after capture by mistnet)	f	m, c	s	ar	Least Concern
409	Tolmomyias poliocephalus (Taczanowski, 1884)	MPEG 1907 (Arumateua), 1910 (Igarape Pai Lourenco and Baiao), 1911 (Cameta), 1916 (Cameta), 1978 (Tucurui, left bank, Sitio Calandrini); AMNH 1911 (Cameta)		Pc, Bc, Qs	WA14583 - SD, XC4682 - SD (UHE Tucurui Reservoir)	resident	on both banks	on both banks	Tape-recorded/Photographed	sg, f	c, ef	s, cf	ar	Least Concern
410	Tolmomyias flaviventris (Wied, 1831)	MPEG 1907 (Arumateua), 1978 (Tucurui, left bank, Sitio Calandrini)		Pc, Mn, Bc, Qs	S63290895, S63464378 - DA, S63631389, S63631381 - DF, S63291446, S63472212 - FF (Tucurui)	resident (confirmed breeding activity)	on both banks	on both banks	Tape-recorded/Photographed (after capture by mistnet)	sg, f	ef	s	ar	Least Concern
411	Todirostrum maculatum (Desmarest, 1806)	MPEG 1907 (Arumateua), 1912 (Alcobaca [=Tucurui]), 1978 (Tucurui, left bank, Sitio Calandrini), 1984 (Tucurui, left bank, and right bank, Canoal)	PIAF 1984; Operação Curupira 1984	Bc, Qs	XC402862 - TD (Itupiranga), S51858622 - JV, S63290895, S63339186 - DA, S63631389, S63339186 - DF, S63291446, S63339866 - FF (Tucurui)	resident	on both banks	on left bank		sg	ef, tf	s	ar	Least Concern
412	Todirostrum chrysocrotaphum Strickland, 1850	MPEG 1910 (Baiao), 1912 (Arumateua)		Pc, Qs	XC5965 - SD, XC5964 - SD, XC5962 - SD, XC5963 - SD (UHE Tucurui Reservoir), XC390543 - SD (Novo Repartimento)	resident	on both banks	on both banks	Tape-recorded/Photographed	f, sg	c	s	ar	Least Concern
413	Poecilotriccus sylvia (Desmarest, 1806)	AMNH 1931 (Mocajuba)		Pc, Qs	XC4654 - SD (UHE Tucurui Reservoir), WA3652688 - DF, WA3745076 - DA (Tucurui), WA1179979 - IT (Goianesia), S63218830, S63290895, S63339186, S63464378 - DA, S63631395, S63631389, S63339186, S63631381 - DF, S63218971, S63291446, S63339866, S63472212 - FF (Tucurui)	resident	on both banks	on rigth bank	Tape-recorded/Photographed	sg	ef, u	s	ar	Least Concern				x
414	Myiornis ecaudatus (d'Orbigny & Lafresnaye, 1837)	MPEG 1911 (Cameta)		Pc, Qs	WA3209068 - DF (Tucurui), XC123542 - SD, XC9437 - SD, XC6571 - SD (UHE Tucurui Reservoir)	resident	on both banks	on both banks	Tape-recorded	f	m, ef	s	ar	Least Concern
415	Hemitriccus minor (Snethlage, 1907)	MPEG 1907 (Arumateua), 1911 (Cameta), 1912 (Arumateua), 1916 (Cameta, Fazenda Vaicajo), 1978 (Tucurui, left bank, Sitio Calandrini), 1984 (Tucurui, left bank, Jacunda ), 1985 (Tucurui, left bank, Fazendas Reunidas); AMNH 1911 (Cameta); 1912 (Arumateua)	PIAF 1984	Pc, Mn, Qs	XC4833 - SD (UHE Tucurui Reservoir)	resident	on left bank	on left bank	Tape-recorded/Photographed (after capture by mistnet)	f, sg	u, ef, tf	s	ar	Least Concern					x
416	Hemitriccus griseipectus (Snethlage, 1907)	MPEG 1907 (Alcobaca [=Tucurui]); AMNH 1911 (Cameta)		Pc, Qs		resident	on left bank	on left bank	Tape-recorded	f	m	s	ar	Least Concern					x
417	Lophotriccus galeatus (Boddaert, 1783)	MPEG 1910 (Baiao); AMNH 1931 (Baiao and Mocajuba)		Pc, Mn, Qs	WA2567002 - SD, XC26986 - SD, XC8760 - SD (UHE Tucurui Reservoir)	resident	on rigth bank	on rigth bank	Tape-recorded/Photographed	f	m	s	ar	Least Concern				x
418	TYRANNIDAE
419	Zimmerius acer (Salvin & Godman, 1883)	MPEG 1907 (Arumateua), 1910 (Baiao), 1911 (Cameta), 1916 (Cameta), 1978 (Tucurui, left bank, Sitio Calandrini)		Pc, Qs		resident	on both banks	on both banks	Tape-recorded/Photographed	f, sg	c	s, cf	om	Least Concern
420	Inezia subflava (Sclater & Salvin, 1873)	MPEG 1907 (Arumateua, Ilha das Pacas and Alcobaca [=Tucurui]), 1910 (Igarape Pai Lourenco), 1912 (Arumateua), 1978 (Tucurui, left bank, Sitio Calandrini), 1984 (Tucurui, Ilha Tocantins), 1988 (Tucurui, right bank, Base 4); AMNH 1907 (Rio Tocantins)		Pc, Qs	WA2580736 - SD (UHE Tucurui Reservoir), XC402855 - TD (Itupiranga)	resident	on both banks	on left bank	Photographed	w	ef, u	s	ar	Least Concern
421	Ornithion inerme Hartlaub, 1853	MPEG 1907 (Arumateua), 1984 (Tucurui, left bank, Jacunda); AMNH 1931 (Baiao)	PIAF 1984	Pc, Bc, Qs	WA1835828 - DF (Tucurui)	resident	on both banks	on both banks	Tape-recorded	f	c, ef	s, cf	ar	Least Concern
422	Camptostoma obsoletum (Temminck, 1824)	MPEG 1907 (Arumateua); AMNH 1931 (Baiao and Mocajuba)		Pc, Mn, Bc, Qs	S63203184, S63218830, S63290895 - DA, S63631395, S63631389 - DF, S63203209, S63218971, S63291446 - FF (Tucurui)	resident	on both banks	on both banks	Tape-recorded	sg, w	c	s	ar	Least Concern
423	Elaenia flavogaster (Thunberg, 1822)			Pc, Bc, Qs	WA146567 - GSe (Goianesia), S51874251 - JV, S63290895, S63339186 - DA, S63631389, S63339186 - DF, S63291446, S63339866 - FF (Tucurui)	resident	on both banks	on both banks		sg	c	s, mf	om	Least Concern
424	Elaenia chilensis Hellmayr, 1927	MPEG 1907 (Arumateua)				migrant	on both banks			sg	c, ef	s	om	Least Concern
425	Elaenia chiriquensis Lawrence, 1865	MPEG 1907 (Arumateua), 1916 (Cameta, Campo de Pucurijo)				migrant	on both banks			sg, ao	c	s	om	Least Concern
426	Myiopagis gaimardii (d'Orbigny, 1839)	MPEG 1907 (Arumateua and Alcobaca [=Tucurui]), 1910 (Baiao and Igarape Pai Lourenco), 1911 (Cameta), 1984 (Tucurui, right bank, Canoal)	PIAF 1984	Pc, Mn, Bc, Qs	WA17113 - SD, WA14409 - SD (UHE Tucurui Reservoir), S63290895 - DA, S63631389 - DF, S63291446 - FF (Tucurui)	resident	on both banks	on both banks	Tape-recorded/Photographed	f, sg	ef, c, m	s, cf	ar	Least Concern
427	Myiopagis caniceps (Swainson, 1835)			Pc, Mn, Qs	XC16860 - SD (UHE Tucurui Reservoir)	migrant	on rigth bank	on rigth bank		f, sg	c	s, cf	ar	Least Concern
428	Tyrannulus elatus (Latham, 1790)	MPEG 1907 (Arumateua and Alcobaca [=Tucurui]); AMNH 1907 (Arumateua and Alcobaca [=Tucurui]), 1931 (Baiao and Mocajuba)		Pc, Qs	S63218830 - DA, S63631395 - DF, S63218971 - FF (Tucurui)	resident	on both banks	on both banks	Photographed	sg, f	c, ef	s, cf	ar	Least Concern
429	Capsiempis flaveola (Lichtenstein, 1823)	MPEG 1907 (Arumateua), 1978 (Tucurui, left bank, Sitio Calandrini), 1984 (Tucurui, Ilha Tocantins)				resident	on both banks			sg, w	ef	s	ar	Least Concern
430	Phaeomyias murina (Spix, 1825)	MPEG 1907 (Alcobaca [=Tucurui]), 1912 (Arumateua); AMNH 1931 (Baiao)	PIAF 1984	Bc, Qs	S63339186 - DA, S63339186 - DF, S63339866 - FF (Tucurui)	migrant	on both banks	on left bank		sg, w	ef	s	om	Least Concern
431	Serpophaga hypoleuca Sclater & Salvin, 1866	MPEG 1907 (Alcobaca [=Tucurui])				resident	on both banks			sg, w	ef	s	ar	Least Concern	VU - subspecie "pallida"
432	Attila cinnamomeus (Gmelin, 1789)	MPEG 1984 (Tucurui, left bank, Jacunda)	PIAF 1984	Pc, Mn, Bc, Qs	WA3267692 - JV (Tucurui), S59204910, S66125685 - FB, S63290895, S63339186, S63464378 - DA, S63631389, S63339186, S63631381 - DF, S63291446, S63339866, S63472212 - FF (Tucurui)	resident	on both banks	on left bank	Tape-recorded	w, sg	w	s	ar	Least Concern
433	Attila spadiceus (Gmelin, 1789)	MPEG 1911 (Cameta), 1912 (Alcobaca [=Tucurui), 1916 (Cameta, Fazenda Vaicajo), 1984 (Tucurui, left bank, Jacunda, and Ilha Tocantins)	PIAF 1984	Pc, Mn, Bc, Qs	WA2699033 - LM e WA2121092 - AC (Novo Repartimento), S63290895 - DA, S63631389 - DF, S63291446 - FF (Tucurui)	resident	on both banks	on both banks	Tape-recorded/Photographed	f	c, m	s	ar	Least Concern
434	Legatus leucophaius (Vieillot, 1818)	AMNH 1931 (Baiao and Mocajuba)		Pc, Bc, Qs	WA1351943 - DF (Tucurui), S63203184 - DA, S63203209 - FF (Tucurui)	migrant	on both banks	on both banks		sg, f	c, ef	s	fr	Least Concern
435	Myiarchus tuberculifer (d'Orbigny & Lafresnaye, 1837)			Pc, Qs	WA1182997 - IT, WA1165969 - NM, WA1163810 - AL (Goianesia), XC213030 - GL (Novo Repartimento)	migrant	on both banks	on both banks	Tape-recorded	f	u	s	ar	Least Concern
436	Myiarchus ferox (Gmelin, 1789)	MPEG 1907 (Arumateua), 1984 (Tucurui, right bank, Canoal)	PIAF 1984	Pc, Mn, Bc, Qs	WA2567003 - SD (UHE Tucurui Reservoir), WA3745093 - DA (Tucurui), S51858622 - JV, S63290895, S63339186, S63464378 - DA, S63631389, S63339186, S63631381 - DF, S63291446, S63339866, S63472212 - FF (Tucurui)	resident	on both banks	on both banks	Photographed	sg	ef	s	om	Least Concern
437	Sirystes sibilator (Vieillot, 1818)	AMNH 1931 (Baiao)		Pc	XC13732 - SD (UHE Tucurui Reservoir)	migrant	on rigth bank	on rigth bank	Tape-recorded	f	c	s	ar	Least Concern
438	Rhytipterna simplex (Lichtenstein, 1823)	MPEG 1911 (Cameta), 1916 (Cameta, Fazenda Vaicajo), 1984 (Tucurui, Ilha Tocantins)		Pc, Qs	WA1177962 - AL (Goianesia)	resident	on both banks	on both banks	Tape-recorded	f	m	s	ar	Least Concern
439	Casiornis fuscus Sclater & Salvin, 1873	MPEG 1912 (Arumateua)		Mn, Qs		migrant	on both banks	on both banks	Photographed (after capture by mistnet)	sg	ef	s	ar	Least Concern
440	Pitangus sulphuratus (Linnaeus, 1766)	MPEG 1907 (Arumateua), 1916 (Cameta, Campo de Pucurijo), 1978 (Tucurui, left bank, Sitio Calandrini), 1984 (Tucurui, right bank, Canoal, and Maraba); AMNH 1931 (Baiao and Mocajuba)	PIAF 1984	Pc, Bc, Qs	WA940565 - RG, WA2084791 - LC, WA4204649 - EM (Tucurui), S51858622, S51874251 - JV, S59204910, S66125685 - FB, S63290895 - DA, S63631389 - DF, S63291446 - FF (Tucurui)	resident	on both banks	on both banks	Photographed	oa, w, sg	w, ef	s	om	Least Concern
441	Philohydor lictor (Lichtenstein, 1823)	MPEG 1984 (Tucurui, right bank, Canoal)	PIAF 1984	Pc, Bc, Qs	WA2567007 - SD (UHE Tucurui Reservoir), WA1181925 - IT (Goianesia), S51858622, S51874251 - JV (Tucurui)	resident	on both banks	on both banks	Photographed	w	w	s	om	Least Concern
442	Myiodynastes maculatus (Statius Muller, 1776)	MPEG 1907 (Arumateua); AMNH 1931 (Baiao)		Pc, Mn, Bc, Qs	WA3256822 - JV, WA3770223 - DA, WA4204708 - EnM	migrant	on both banks	on both banks	Tape-recorded/Photographed (after capture by mistnet)	sg, f	c, ef	s	om	Least Concern
443	Megarynchus pitangua (Linnaeus, 1766)	MPEG 1907 (Arumateua), 1911 (Cameta), 1912 (Arumateua), 1984 (Tucurui, right bank); AMNH 1911 (Cameta), 1931 (Mocajuba)	PIAF 1984	Pc, Bc	S51858622 - JV, S63203184, S63290895 - DA, S63631389 - DF, S63203209, S63291446 - FF (Tucurui)	resident	on both banks	on left bank		sg	ef	s	om	Least Concern
444	Myiozetetes cayanensis (Linnaeus, 1766)	MPEG 1916 (Cameta, Campo de Pucurijo), 1984 (Tucurui, right bank, Canoal), 1985 (Tucurui)	PIAF 1984	Bc, Qs	WA3396333 - EF (Tucurui), S51858622, S51874251 - JV, S63203184, S63218830, S63290895, S63339186 - DA, S63631395, S63631389, S63339186 - DF, S63203209, S63218971, S63291446, S63339866 - FF, S66125685 - FB (Tucurui)	resident (confirmed breeding activity)	on both banks	on both banks	Photographed	sg	c, ef, i	s	om	Least Concern
445	Myiozetetes similis (Spix, 1825)			Bc		migrant	on rigth bank	on both banks		sg	c, ef, i	s	om	Least Concern
446	Tyrannus albogularis Burmeister, 1856			Qs	WA2343152 - SD (UHE Tucurui Reservoir)	migrant	on left bank	on left bank	Photographed	sg, w	ef	s	om	Least Concern
447	Tyrannus melancholicus Vieillot, 1819	MPEG 1907 (Arumateua), 1912 (Mazagao), 1916 (Cameta)		Pc, Bc, Qs	WA3233952 - DA, WA4204699 - EnM, WA1140676 - RG (Tucurui), WA1218851 - NW, WA2530906 - AN (Jacunda), WA943584 - GC, WA2122686 - AC (Novo Repartimento), WA1423454 - DF (Breu Branco), S51858622, S51874251 - JV, S59204910 - FB, S63290895, S63339186 - DA, S63631389, S63339186 - DF, S63291446, S63339866 - FF (Tucurui)	resident	on both banks	on both banks	Photographed	sg, w	c, ef, i	s	om	Least Concern
448	Tyrannus savana Daudin, 1802			Bc, Qs	WA1640836 - DF (Tucurui)	migrant	on both banks	on left bank		sg, oa	ef, tf, c	s, mf	om	Least Concern
449	Empidonomus varius (Vieillot, 1818)	MPEG 1907 (Arumateua), 1910 (Baiao); AMNH 1931 (Mocajuba and Baiao)		Pc, Bc, Qs	WA2768694 - SD (UHE Tucurui Reservoir), WA2120186 - AC (Novo Repartimento), S51874251 - JV (Tucurui)	resident	on both banks	on left bank	Photographed	sg	c, ef	s	om	Least Concern
450	Colonia colonus (Vieillot, 1818)				WA3220453 - DA (Tucurui), WA1164794 - NM (Goianesia), S63290895 - DA, S63631389 - DF, S63291446 - FF (Tucurui)	migrant	not expected			sg, ao	ef, tf, c	s, mf	om	Least Concern
451	Sublegatus obscurior Todd, 1920			Qs	XC15516 - SD (UHE Tucurui Reservoir)	resident	on rigth bank	on rigth bank	Tape-recorded	sg, w	c	s	ar	Least Concern
452	Arundinicola leucocephala (Linnaeus, 1764)			Bc, Qs	WA1489194 - NW e WA1489193 - NW (Itupiranga)	resident	on both banks	on left bank		w, sg	ef	s	ar	Least Concern
453	Cnemotriccus fuscatus (Wied, 1831)	MPEG 1984 (Tucurui)				resident	on both banks			sg, f	u, ef	s	ar	Least Concern
454	Lathrotriccus euleri (Cabanis, 1868)	MPEG 1907 (Alcobaca [=Tucurui])		Pc	WA2275049 - GC (Novo Repartimento)	resident	on both banks	on rigth bank		w, sg	u	s	ar	Least Concern
455	Knipolegus poecilocercus (Pelzeln, 1868)	MPEG 1907 (Alcobaca [=Tucurui]), 1912 (Arumateua), 1984 (Tucurui, left bank, Jacunda); AMNH 1907 (Alcobaca [=Tucurui]), 1912 (Arumateua)	PIAF 1984; Operação Curupira 1984	Mn, Qs		resident	on both banks	on left bank		w, sg	u, ef	s	ar	Least Concern
456	VIREONIDAE
457	Cyclarhis gujanensis (Gmelin, 1789)	MPEG 1910 (Ilha Pirinum); AMNH 1931 (Baiao and Mocajuba)		Pc, Bc, Qs	WA1833386 - DF (UHE Tucurui Reservoir), XC400659 - GL (Novo Repartimento), S63218830, S63290895, S63339186, S63464378 - DA, S63631395, S63631389, S63339186, S63631381 - DF, S63218971, S63291446, S63339866, S63472212 - FF (Tucurui)	resident	on both banks	on both banks		sg, f	c, ef	s	ar	Least Concern
458	Vireolanius leucotis (Swainson, 1838)	MPEG 1912 (Arumateua); AMNH 1912 (Arumateua)				resident	on left bank			f	c, m	s, cf	ar	Least Concern					x
459	Hylophilus pectoralis Sclater, 1866	MPEG 1910 (Igarape Pai Lourenco), 1984 (Tucurui, right bank, Canoal)	PIAF 1984	Bc, Qs	WA3255047, WA3273983 - JV (Tucurui), XC6511 - SD (UHE Tucurui Reservoir), S51874251* - JV, S63290895 - DA, S63631389 - DF, S63291446 - FF (Tucurui)	resident	on both banks	on left bank	Tape-recorded	sg	ef	s	ar	Least Concern
460	Hylophilus semicinereus Sclater & Salvin, 1867	MPEG 1910 (Baiao), 1911 (Cameta), 1912 (Arumateua)		Pc, Bc, Qs	WA15958 - SD (UHE Tucurui Reservoir), S63290895 - DA, S63631389 - DF, S63291446 - FF (Tucurui)	resident	on both banks	on both banks	Photographed	sg, f	c, m, ef	s, cf	ar	Least Concern
461	Tunchiornis ochraceiceps (Sclater, 1860)	MPEG 1984 (Tucurui, left bank, Igarape Saude)	PIAF 1984	Pc, Mn, Qs	XC17675 - SD (UHE Tucurui Reservoir), WA2659846 - FA, XC388512 - GL, XC400650 - GL, XC388512 - FA (Novo Repartimento), WA1162081 - AL, WA1234649 - AL (Goianesia)	resident	on both banks	on rigth bank	Photographed (after capture by mistnet)	f	m, u, tf	s, uf	ar	Least Concern	VU - subspecie "rubrifrons"
462	Pachysylvia hypoxantha Pelzeln, 1868	MPEG 1911 (Cameta)		Pc, Bc, Qs	WA1433439 - GC (Novo Repartimento)	resident	on left bank	on left bank		f	c	s, cf	ar	Least Concern					x
463	Vireo chivi (Vieillot, 1817)	MPEG 1907 (Arumateua), 1910 (Baiao), 1911 (Cameta), 1916 (Cameta), 1986 (Tucurui, right bank, Base 4); AMNH 1910 (Baiao), 1931 (Baiao and Mocajuba)		Pc, Qs	WA3733677 - DF (Tucurui), S63290895 - DA, S63631389 - DF, S63291446 - FF (Tucurui)	migrant	on both banks	on left bank	Photographed	sg, f	c, ef	s, cf	ar	Least Concern
464	HIRUNDINIDAE
465	Pygochelidon melanoleuca (Wied, 1820)	MPEG 1912 (Arumateua), 1984 (Tucurui); AMNH 1912 (Arumateua); MCZ 1957 (Maraba)			WA2687865 - FP WA2254127 - LM, WA1175049 - CE (Itupiranga)	migrant	on both banks			w	a, w	mf	ar	Least Concern
466	Atticora fasciata (Gmelin, 1789)	MPEG 1984 (Tucurui, Ilha Tocantins)			WA1175061 - CE (Jacunda), WA1024333 - IT (Goianesia)	resident	on both banks			w	a, w	mf	ar	Least Concern
467	Stelgidopteryx ruficollis (Vieillot, 1817)	MPEG 1978 (Tucurui, left bank, Sitio Calandrini); AMNH 1931 (Baiao and Mocajuba)		Bc, Qs	WA1233526 - FF, WA960532 - RG, WA943583 - RG, WA3692710 - MT (Tucurui), WA2121122 - AC (Novo Repartimento), WA2761162 - DF (Itupiranga), S63203184 - DA, S63203209 - FF (Tucurui)	migrant	on both banks	on both banks		sg, w	a	mf	ar	Least Concern
468	Progne tapera (Vieillot, 1817)	MPEG 1988 (Tucurui, right bank, Base 4)		Bc, Qs	WA16604 - SD (UHE Tucurui Reservoir)	migrant	on both banks	on both banks	Photographed	w	a, w	mf	ar	Least Concern
469	Progne chalybea (Gmelin, 1789)			Bc, Qs	WA2122691 - AC (Novo Repartimento), S51858622, S51874251 - JV (Tucurui)	migrant	on both banks	on both banks		sg, w	a, w	mf	ar	Least Concern
470	Tachycineta albiventer (Boddaert, 1783)	MPEG 1907 (Alcobaca [=Tucurui]), 1984 (Tucurui, Ilha Tocantins and Ilha Tangerina); MCZ 1920 (Maraba and Alcobaca [=Tucurui])		Pc, Bc, Qs	WA3691224 - MT (Tucurui), WA2122680 - AC, WA2119649 - AC (Novo Repartimento), WA2215014 - TD (Itupiranga)	resident	on both banks	on both banks		w	a, w	mf	ar	Least Concern
471	TROGLODYTIDAE
472	Microcerculus marginatus (Sclater, 1855)	MPEG 1984 (Tucurui, left bank, Jacunda); AMNH 1931 (Baiao)	PIAF 1984	Pc, Mn		resident	on both banks	on left bank	Tape-recorded	f	t, u	s	ar	Least Concern
473	Troglodytes musculus Naumann, 1823	MPEG 1907 (Alcobaca [=Tucurui], 1916 (Cameta), 1984 (Tucurui, left bank, Vale do Caraipe); AMNH 1931 (Baiao)		Pc, Mn, Bc, Qs	WA4191758 - NW (Tucurui), WA2122644 - AC (Novo Repartimento), S51874251 - JV, S59204910 - FB, S63290895, S63339186 - DA, S63631389, S63339186 - DF, S63291446, S63339866 - FF (Tucurui)	resident	on both banks	on both banks	Photographed (after capture by mistnet)	sg	u	s	ar	Least Concern
474	Campylorhynchus turdinus (Wied, 1831)	MPEG 1907 (Arumateua), 1978 (Tucurui, left bank, Sitio Calandrini), 1984 (Tucurui, left bank, Vila Temporaria I)	PIAF 1984	Pc, Mn, Bc, Qs	WA3397881 - EF, WA3668073 - DA, WA3733324 - MT (Tucurui), XC213011 - GL (Novo Repartimento)	resident	on both banks	on both banks	Tape-recorded	f, sg	c	s	ar	Least Concern
475	Pheugopedius genibarbis (Swainson, 1838)	MPEG 1910, (Baiao and Igarape Boca do Manapiri), 1984 (Tucurui, right bank, Canoal); AMNH 1910 (Baiao), 1931 (Baiao and Mocajuba)	PIAF 1984	Pc, Mn, Bc, Qs	WA3254369, WA3273984 - JV (Tucurui), S51858622*, S51874251 - JV, S63218830, S63464378 - DA, S63631395, S63631381 - DF, S63218971, S63472212 - FF (Tucurui)	resident	on rigth bank	on rigth bank	Tape-recorded/Photographed (after capture by mistnet)	f, sg	u, ef	s	ar	Least Concern				x
476	Pheugopedius coraya (Gmelin, 1789)	MPEG 1911 (Cameta), 1912 (Arumateua), 1916 (Cameta, Fazenda Vaicajo), 1984 (Tucurui, left bank, Jacunda), 1985 (Tucurui, left bank, Fazendas Reunidas); AMNH 1911 (Cameta)	PIAF 1984	Pc	XC400662 - GL, XC213032 - GL (Novo Repartimento)	resident	on left bank	on left bank		f, sg	u, ef	s	ar	Least Concern					x
477	Cantorchilus leucotis (Lafresnaye, 1845)	MPEG 1907 (Arumateua), 1978 (Tucurui, left bank, Sitio Calandrini), 1984 (Tucurui, left bank, Jacunda, and Ilha Tocantins)	PIAF 1984	Mn, Qs	WA938754 - RG (Tucurui), S63203184, S63218830, S63290895, S63339186, S63464378 - DA, S63631395, S63631389, S63339186, S63631381 - DF, S63203209, S63218971, S63291446, S63339866, S63472212 - FF (Tucurui)	resident	on both banks	on left bank		sg, w	u, ef, i	s	ar	Least Concern
478	DONACOBIIDAE
479	Donacobius atricapilla (Linnaeus, 1766)	MPEG 1978 (Tucurui, left bank, Sitio Calandrini), 1984 (Tucurui, left bank, Jatobal)	PIAF 1984	Bc, Qs	WA2768693 - SD (UHE Tucurui Reservoir), WA930727 - RG, WA938464 - RG, WA3232681 - DA (Tucurui), WA2117879 - AC, WA1073408 - FR (Novo Repartimento), S51858622, S51874251 - JV, S59204910 - FB, S63290895, S63339186 - DA, S63631389, S63339186 - DF, S63291446, S63339866 - FF (Tucurui)	resident	on both banks	on both banks	Photographed	w, sg	ef, tf	s	ar	Least Concern
480	POLIOPTILIDAE
481	Ramphocaenus melanurus Vieillot, 1819	MPEG 1907 (Arumateua), 1910 (Baiao), MPEG 1911 (Cameta), 1912 (Mazagao), 1916 (Cameta, Fazenda Vaicajo), 1984 (Tucurui, left bank, Cocal and Jacunda); AMNH 1910 (Baiao), 1911 (Cameta), 1931 (Baiao and Mocajuba)	PIAF 1984	Pc, Mn, Bc, Qs	XC27206 - SD (UHE Tucurui Reservoir), XC213035 - GL (Novo Repartimento). S63290895, S63464378 - DA, S63631389, S63631381 - DF, S63291446, S63472212 - FF (Tucurui)	resident	on both banks	on both banks	Tape-recorded/Photographed (after capture by mistnet)	f	m, u	s, uf	ar	Least Concern
482	Polioptila plumbea (Gmelin, 1788)	MPEG 1907 (Arumateua), 1910 (Igarape Pai Lourenco and Igarape Pirinum), 1984 (Tucurui); AMNH 1931 (Baiao and Mocajuba)	Operação Curupira 1984	Pc	XC402859 - TD (Itupiranga)	resident	on both banks	on rigth bank		sg, f	c, ef	cf	ar	Least Concern
483	TURDIDAE
484	Catharus fuscescens (Stephens, 1817)			Mn		migrant	on rigth bank	on rigth bank		f	u	s	om	Least Concern
485	Turdus leucomelas Vieillot, 1818				WA938757 - RG, WA938756 - RG (Tucurui), S51858622, S51874251 - JV (Tucurui)	resident	on both banks			sg	u	s	om	Least Concern
486	Turdus fumigatus Lichtenstein, 1823	MPEG 1910 (Baiao), 1911 (Cameta), 1916 (Cameta), 1978 (Tucurui, left bank, Sitio Caladrini), 1984 (Tucurui, left bank, Jacunda and Igarape Saude); MCZ 1920 (Maraba)	PIAF 1984		WA2885075 - AG (Novo Repartmento), S63339186 - DA, S63339186 - DF, S63339866 - FF (Tucurui)	resident	on both banks			f	u, m	s	om	Least Concern
487	Turdus nudigenis Lafresnaye, 1848				WA3254367 - JV (Tucurui), WA2622153 - SD (Novo Repartimento), S51858622*, S51874251 - JV, S59204910, S66125685 - FB (Tucurui)	not expected, probably colonizer	not expected			f, sg	u	s	om	Least Concern
488	Turdus albicollis Vieillot, 1818	MPEG 1911 (Cameta), 1916 (Cameta, Fazenda Vaicajo), 1984 (Tucurui, left bank, Igarape Saude and Vale do Caraipe, and Ilha Tocantins); AMNH 1911 (Cameta)	PIAF 1984	Pc, Mn, Qs		resident	on both banks	on both banks	Tape-recorded/Photographed (after capture by mistnet)	f	u, m	s	om	Least Concern
489	MOTACILLIDAE
490	Anthus lutescens Pucheran, 1855			Bc, Qs		not expected, probably colonizer	not expected	on both banks		oa	t	s	ar	Least Concern
491	PASSERELLIDAE
492	Ammodramus aurifrons (Spix, 1825)	MPEG 1907 (Arumateua), 1910 (Baiao), 1984 (Tucurui, right bank, Canoal)	PIAF 1984	Bc, Qs	WA15858 - SD, WA2565172 - SD (UHE Tucurui Reservoir), WA3266560 - JV, WA3614688 - EF, WA3648266 - DA (Tucurui), S63218830*, S63290895 - DA, S63631395, S63631389 - DF, S63218971, S63291446 - FF (Tucurui)	resident	on both banks	on both banks	Photographed	oa, sg	t	s	se	Least Concern
493	Arremon taciturnus (Hermann, 1783)	MPEG 1910 (Baiao and Igarape Boca do Manapiri), 1911 (Cameta), 1912 (Arumateua), 1916 (Cameta, Fazenda Vaicajo), 1984 (Tucurui, left bank, Jacunda and Vale do Caraipe, and right bank, Canoal and Jucundazinho, and Ilha Tocantins); AMNH 1931 (Baiao and Mocajuba)	PIAF 1984	Pc, Mn, Bc, Qs	XC213008 - GL (Novo Repartimento), S63291446 - DA, S63631389 - DF, S63291446 - FF (Tucurui)	resident	on both banks	on both banks	Tape-recorded/Photographed (after capture by mistnet)	f, sg	u, ef	s	om	Least Concern
494	PARULIDAE
495	Geothlypis aequinoctialis (Gmelin, 1789)	MPEG 1984 (Tucurui, left bank, Ararao)		Bc, Qs	WA2117881 - AC (Novo Repartimento)	resident	on both banks	on left bank	Photographed (after capture by mistnet)	oa, sg	ef	s	ar	Least Concern
496	Myiothlypis flaveola Baird, 1865			Mn, Qs		not expected, probably colonizer	not expected	on left bank	Photographed (after capture by mistnet)	sg	t, ef	s	ar	Least Concern
497	ICTERIDAE
498	Psarocolius viridis (Statius Muller, 1776)	MPEG 1907 (Arumateua); FMNH 1922 (Rio Tocantins)			WA1165077 - GC, WA1063960 - FR, XC400658 - GL (Novo Repartimento)	resident	on both banks			f	c	mf	om	Least Concern
499	Psarocolius decumanus (Pallas, 1769)	MPEG 1907 (Arumateua), 1912 (Arumateua), 1978 (Tucurui, left bank, Sitio Calandrini), 1984 (Tucurui, right bank, Igarape Altamira); MCZ 1920 (Alcobaca [=Tucurui])	PIAF 1984	Pc, Bc, Qs	WA960533 - RG, WA929598 - RG, WA676371 - YF, WA2084795 - LC, WA3285365 - JV, WA3729214 - MT (Tucurui), S51858622, S51874251 - JV, S59204910 - FB, S63290895 - DA, S63631389 - DF, S63291446 - FF (Tucurui)	resident (confirmed breeding activity)	on both banks	on both banks	Tape-recorded	sg, f	c	mf	om	Least Concern
500	Psarocolius bifasciatus (Spix, 1824)	MPEG 1907 (Arumateua)		Pc, Bc, Qs	XC9074 - SD (UHE Tucurui Reservoir)	resident (confirmed breeding activity)	on both banks	on rigth bank	Tape-recorded	f	c	mf	om	Least Concern
501	Cacicus haemorrhous (Linnaeus, 1766)			Bc, Qs	WA2122646 - AC (Novo Repartimento)	resident	on both banks	on rigth bank	Tape-recorded	f	c	mf	om	Least Concern
502	Cacicus cela (Linnaeus, 1758)	MCZ 1933 (Cameta); MPEG 1984 (Tucurui, left bank, Igarape Saude)	PIAF 1984; Operação Curupira 1984	Pc, Bc, Qs	WA3397883 - EF, WA3701606 - MT (Tucurui), S63203184, S63290895, S63464378 - DA, S63631389, S63631381 - DF, S63203209, S63291446, S63472212 -FF (Tucurui)	resident (confirmed breeding activity)	on both banks	on both banks	Tape-recorded/Photographed	f, sg, w	c, m	mf	om	Least Concern
503	Icterus cayanensis (Linnaeus, 1766)	MPEG 1907 (Arumateua), 1910 (Igarape Araramanha), 1911 (Cameta), 1984 (Tucurui, left bank, Vila Temporaria I) ; AMNH 1931 (Baiao, Ilha do Taiuna and Mocajuba)		Pc, Bc, Qs	WA2768695 - SD (UHE Tucurui Reservoir), WA3218623 - DA (Tucurui)	resident	on both banks	on both banks	Tape-recorded/Photographed	f, sg	ef	mf	om	Least Concern
504	Gymnomystax mexicanus (Linnaeus, 1766)	MPEG 1907 (Alcobaca [Tucurui]); AMNH 1931 (Baiao and Ilha do Taiuna)				resident	on both banks			w	u	mf	om	Least Concern
505	Gnorimopsar chopi (Vieillot, 1819)			Bc, Qs		not expected, probably colonizer	not expected	on rigth bank		oa, w	u	mf	om	Least Concern
506	Molothrus oryzivorus (Gmelin, 1788)			Bc, Qs	WA2892833 -DF (Tucurui)	resident	on both banks	on both banks		sg, f, w	c	mf	om	Least Concern
507	Molothrus bonariensis (Gmelin, 1789)	MPEG 1984 (Maraba) ; MCZ 1920 (Sitio Floresta)		Bc, Qs	WA1297202 - NW (Jacunda), WA2122640 - AC (Novo Repartimento), S63290895 - DA, S63631389 - DF, S63291446 - FF (Tucurui)	resident	on both banks	on both banks		oa, w	t	mf	om	Least Concern
508	Sturnella militaris (Linnaeus, 1758)			Pc, Bc, Qs	WA15729 - SD, WA15949 - SD (UHE Tucurui Reservoir), WA1296539 - NW, WA929597 - NW (Jacunda), WA15949 - RG, WA3397640 - EF, WA3701647 - MT (Tucurui),WA2119648 - AC (Novo Repartimento), WA40607 - GSe (Goianesia), WA2212700 - TD, WA2212708 - TD (Itupiranga), S63290895 - DA, S63631389 - DF, S63291446 - FF (Tucurui)	resident (confirmed breeding activity)	on both banks	on both banks	Photographed	oa, w	t, w	mf	om	Least Concern
509	MITROSPINGIDAE
510	Lamprospiza melanoleuca (Vieillot, 1817)	AMNH 1931 (Baiao)		Pc, Qs	XC4808 - SD (UHE Tucurui Reservoir), WA1277289 - GC (Novo Repartimento), WA1177127 - IT (Goianesia)	resident	on both banks	on both banks	Tape-recorded	f	c	s, mf, cf	om	Least Concern
511	THRAUPIDAE
512	Cissopis leverianus (Gmelin, 1788)			Pc, Bc, Qs	WA2768697 - SD (UHE Tucurui Reservoir), WA1833397 - LC, WA3745090 - DA (Tucurui), S63339186 - DA, S63339186 - DF, S63339866 - FF (Tucurui)	resident	on both banks	on both banks	Photographed	sg, f	c, ef	s, mf	om	Least Concern
513	Paroaria gularis (Linnaeus, 1766)	MPEG 1907 (Arumateua), 1984 (Tucurui, right bank, Canoal); MCZ 1920 (Maraba); AMNH 1931 (Baiao)	PIAF 1984	Bc, Qs	WA940564 - RG, WA929484 - RG, WA673691 - YF, WA2829041 - LF, WA2829037 - LF, WA3172250 - LC, WA3392482 - EF, WA3392482 - MT, WA4204662 - EnM (Tucurui), WA2867585 - DC, WA2697984 - DC, WA2215031 - TD, WA2212712 - TD (Itupiranga), WA2253860 LM (Nova Ipixuna)	resident (confirmed breeding activity)	on both banks	on both banks	Photographed	w, sg	ef	s, mf	om	Least Concern
514	Tangara gyrola (Linnaeus, 1758)	MPEG 1907 (Alcobaca [=Tucurui])			WA1183602 - IT, WA1163798 - NM (Goianesia)	resident	on both banks			f	c, ef	cf	fr	Least Concern
515	Tangara mexicana (Linnaeus, 1766)	MPEG 1907 (Alcobaca [=Tucurui]), 1910 (Baiao), 1912 (Arumateua), 1916 (Cameta)		Pc, Bc, Qs	WA4191756 - NW, WA3732035 - DF, WA3028724 - LF, (Tucurui), WA2867618 - DC (Itupiranga), S63218830, S63290895, S63464378 - DA, S63631395, S63631389, S63631381 - DF, S63218971, S63291446, S63472212 - FF (Tucurui)	resident	on both banks	on left bank	Tape-recorded/Photographed	f, sg	c, ef	mf, cf	fr	Least Concern
516	Tangara chilensis (Vigors, 1832)				WA3745100 - DA (Tucurui), S63290895 - DA, S63631389 - DF, S63291446 - FF (Tucurui)	resident	on both banks			f, sg	c, ef	mf, cf	fr	Least Concern
517	Tangara episcopus (Linnaeus, 1766)	MPEG 1907 (Arumateua), 1978 (Tucurui, left bank, Sitio Calandrini), 1984 (Tucurui, right bank, Canoal)	PIAF 1984	Pc, Mn, Bc, Qs	WA929485 - RG, WA454901 - JS, WA2761247 - DF, WA2697947 - DC, WA2084788 - LC, WA3028722 - LF, WA3285368 - JV, WA3392489 - EF, WA3820469 - LM (Tucurui), WA2122645 - AC, WA2120176 - AC (Novo Repartimento), WA2867584 - DC (Itupiranga), S51858622, S51874251 - JV, S59204910, S66125685 - FB, S63203184, S63218830, S63290895, S63339186 - DA, S63631395, S63631389, S63339186 - DF, S63203209, S63218971, S63…	resident	on both banks	on both banks	Tape-recorded/Photographed	sg, pl	c, ef	s, mf	om	Least Concern
518	Tangara palmarum (Wied, 1821)	MPEG 1907 (Arumateua), 1910 (Baiao), 1916 (Cameta), 1984 (Tucurui, left bank, Vila Temporaria I)		Pc, Mn, Bc, Qs	WA943582 - RG, WA929486 - RG, WA2084830 - LC, WA3754403 - DF (Tucurui), 51858622, S51874251 - JV, S59204910 - FB, S63203184, S63218830, S63290895 - DA, S63631395, S63631389 - DF, S63203209, S63218971, S63291446 - FF (Tucurui)	resident	on both banks	on both banks	Photographed	sg, pl	c, ef	s, mf	om	Least Concern
519	Tangara nigrocincta (Bonaparte, 1838)				WA3218589, WA3218591 - DA, WA3220593 - DF (Tucurui)	not expected, unknown status	not expected							Least Concern
520	Nemosia pileata (Boddaert, 1783)	MPEG 1907 (Arumateua); AMNH 1931 (Ilha Taiuna and Mocajuba)				resident	on both banks			sg	m	s, cf	ar	Least Concern
521	Conirostrum speciosum (Temminck, 1824)	MPEG 1907 (Arumateua)		Pc, Qs	WA3256820 - JV (Tucurui)XC21039 - SD (UHE Tucurui Reservoir)	resident	on both banks	on left bank	Tape-recorded	sg	c	s	ar	Least Concern
522	Chlorophanes spiza (Linnaeus, 1758)	MPEG 1907 (Arumateua); AMNH 1931 (Baiao and Mocajuba)			WA1177108 - IT (Goianesia)	resident	on both banks			f	c	cf	om	Least Concern
523	Hemithraupis guira (Linnaeus, 1766)	MPEG 1907 (Arumateua), 1910 (Baiao and Ilha Pirinum), 1911 (Cameta), 1912 (Arumateua); AMNH 1910 (Baiao), 1911 (Cameta); MCZ 1920 (Maraba)		Pc, Qs	WA1299133 - GC (Novo Repartimento)	resident	on both banks	on both banks	Tape-recorded/Photographed	f	c	s, cf	ar	Least Concern
524	Volatinia jacarina (Linnaeus, 1766)	MPEG 1910 (Baiao), 1978 (Tucurui, left bank, Sitio Calandrini), 1984 (Maraba); AMNH 1931 (Baiao and Mocajuba)		Bc, Qs	WA960534 - RG, WA931955 - RG, WA462990 -JS, WA1424522 - DF (Tucurui), WA2117884 - AC (Novo Repartimento), WA2004129 - IT (Goianesia), S51858622 - JV, S63472212, S63290895, S63339186 - DA, S63631395, S63631389, S63339186 - DF, S63218971, S63291446, S63339866 - FF, S66125685 - FB (Tucurui)	resident	on both banks	on both banks	Photographed	sg, oa	t	mf	se	Least Concern
525	Coryphospingus cucullatus (Statius Muller, 1776)	AMNH 1931 (Baiao); MPEG 1978 (Tucurui, left bank, Sitio Calandrini)		Mn, Qs	WA942770 - SD (UHE Tucurui Reservoir), WA1177979 - IT (Goianesia)	resident	on both banks	on left bank		sg	m, ef	s	om	Least Concern
526	Lanio surinamus (Linnaeus, 1766)	MPEG 1911 (Cameta), 1916 (Cameta, Fazenda Vaicajo)		Qs	WA1178838 - IT (Goianesia)	resident	on both banks	on rigth bank	Photographed (after capture by mistnet)	f	m	s, cf	om	Least Concern
527	Lanio versicolor (d'Orbigny & Lafresnaye, 1837)	MPEG 1912 (Arumateua), 1984 (Tucurui, left bank, Jacunda)	PIAF 1984	Mn, Qs	XC7225 - SD (UHE Tucurui Reservoir), WA2858607 - GL, WA1520084 - KO, WA1434120 - GC, WA2659822 - FA, XC400656 - GL (Novo Repartimento)	resident	on left bank	on left bank	Tape-recorded/Photographed (after capture by mistnet)	f	c, m	s, cf	ar	Least Concern					x
528	Lanio luctuosus (d'Orbigny & Lafresnaye, 1837)	MPEG 1907 (Arumateua), 1910 (Igarape Pirinum), 1912 (Arumateua); AMNH 1910 (Rio Tocantins)		Pc, Qs	WA2567001 - SD (UHE Tucurui Reservoir), WA3240141 - DF (Tucurui), WA2222539 - AG (Novo Repartimento)	resident	on both banks	on rigth bank	Tape-recorded/Photographed	sg, f	m, ef	s	om	Least Concern
529	Lanio cristatus (Linnaeus, 1766)	MPEG 1910 (Baiao), 1911 (Cameta), 1912 (Cameta), 1916 (Cameta), 1984 (Tucurui, Ilha Tocantins); AMNH 1910 (Baiao)			WA1177990 - IT (Goianesia)	resident	on both banks			f	c, m	s, cf	om	Least Concern
530	Tachyphonus rufus (Boddaert, 1783)	MPEG 1910 (Baiao) , 1912 (Arumateua), 1978 (Tucurui, left bank, Sitio Calandrini), 1984 (Tucurui, left bank, Vila Temporaria I, and right bank, Canoal), 1985 (Tucurui); AMNH 1910 (Baiao); MCZ 1920 (Maraba)	PIAF 1984	Mn, Bc, Qs	WA931953 - RG, WA3648195 - DA (Tucurui), S51874251 - JV, S63203184*, S63290895 - DA, S63631389 - DF, S63203209, S63291446 - FF (Tucurui)	resident	on both banks	on both banks	Photographed	sg	c	s	om	Least Concern
531	Ramphocelus carbo (Pallas, 1764)	MPEG 1907 (Arumateua), 1911 (Cameta), 1916 (Cameta, Fazenda Vaicajo), 1978 (Tucurui, left bank, Sitio Calandrini), 1984 (Tucurui, left bank, Jacunda, and right bank, Canoal, and Ilha Tocantins); AMNH 1911 (Cameta), 1931 (Baiao and Mocajuba)	PIAF 1984; Operação Curupira 1984	Pc, Mn, Bc, Qs	WA929599 - RG, WA929600 - RG, WA1908746 - GS, WA3392487 - EF (Tucurui), S51858622, S51874251 - JV, S59204910, S66125685 - FB, S63203184, S63290895, S63339186, S63464378 - DA, S63631389, S63339186, S63631381 - DF, S63203209, S63291446, S63339866, S63472212 - FF (Tucurui)	resident (confirmed breeding activity)	on both banks	on both banks	Tape-recorded/Photographed	sg, pl	u	s, mf	om	Least Concern
532	Cyanerpes caeruleus (Linnaeus, 1758)	MPEG 1907 (Arumateua), 1916 (Cameta)			WA1182998 - IT (Goianesia), S63472212 - DA, S63631395 - DF, S63218971 - FF (Tucurui)	resident	on both banks			f	c	s, cf	om	Least Concern
533	Cyanerpes cyaneus (Linnaeus, 1766)	MPEG 1907 (Arumateua), 1916 (Cameta)			WA1178839 - IT (Goianesia)	resident	on both banks			f	c	s, cf	om	Least Concern
534	Dacnis cayana (Linnaeus, 1766)	MPEG 1910 (Baiao), 1911 (Cameta), 1912 (Arumateua), 1916 (Cameta); AMNH 1931 (Baiao and Mocajuba)		Pc, Qs	WA2768698 - SD (UHE Tucurui Reservoir), WA1835844 - DF, WA3726423 - DF (Tucurui)	resident	on both banks	on rigth bank	Photographed	f	c	cf	om	Least Concern
535	Coereba flaveola (Linnaeus, 1758)	MPEG 1907 (Arumateua), 1911 (Cameta), 1916 (Cameta), 1984 (Tucurui, left bank, Jacunda); AMNH 1931 (Baiao and Mocajuba)	PIAF 1984	Pc, Bc, Qs	S63290895, S63464378 - DA, S63631389, S63631381 - DF, S63291446, S63472212 - FF (Tucurui)	resident	on both banks	on both banks	Tape-recorded	sg, f	c, ef	s	ni	Least Concern
536	Sporophila lineola (Linnaeus, 1758)	MPEG 1910 (Ilha Pirinum), 1978 (Tucurui, left bank, Sitio Calandrini)		Bc		migrant	on both banks	on left bank		sg, oa, w	t	mf	se	Least Concern
537	Sporophila americana (Gmelin, 1789)	MPEG 1907 (Alcobaca [=Tucurui])), 1910 (Igarape Pai Lourenco), 1978 (Tucurui, left bank, Sitio Calandrini), 1985 (Tucurui)		Qs	WA2702789 - SD (UHE Tucurui Reservoir), WA2084792 - LC, WA3770254 - DA (Tucurui), WA2121236 - AC, WA2117875 - AC (Novo Repartimento), WA1178828 - IT (Goianesia), WA2212703 - TD (Itupiranga), S63290895, S63339186 - DA, S63631389, S63339186 - DF, S63291446, S63339866 - FF (Tucurui)	resident	on both banks	on left bank	Photographed	sg, oa, w	t	mf	se	Least Concern
538	Sporophila nigricollis (Vieillot, 1823)	MPEG 1911 (Cameta), 1912 (Arumateua), 1978 (Tucurui, left bank, Sitio Calandrini)		Bc, Qs	XC4831 - SD (UHE Tucurui Reservoir)WA1337774 - NW (Jacunda), WA936288 - RG, WA2084789 - LC (Tucurui), WA2004132 - IT (Goianesia), S51858622, S51874251 - JV, S66125685 - FB (Tucurui)	resident	on both banks	on both banks	Tape-recorded/Photographed	sg, oa	t	mf	se	Least Concern
539	Sporophila minuta (Linnaeus, 1758)	MPEG 1907 (Alcobaca [=Tucurui])		Bc, Qs	WA3730474 - DF (Tucurui), WA2004131 - IT (Goianesia), S63290895 - DA, S63631389 - DF, S63291446- FF (Tucurui)	resident	on both banks	on rigth bank		sg, oa, w	t	mf	se	Least Concern
540	Sporophila castaneiventris Cabanis, 1849	MPEG 1978 (Tucurui, left bank, Sitio Calandrini), 1984 (Tucurui, right bank, Canoal and Maraba)	PIAF 1984	Bc, Qs	WA3726418 - DF (Tucurui), WA40606 - GSe (Goianesia), WA2215013 - TD (Itupiranga), S66125685 - FB (Tucurui)	migrant	on both banks	on both banks	Photographed	sg, oa, w	t	mf	se	Least Concern
541	Sporophila angolensis (Linnaeus, 1766)	MPEG 1911 (Cameta)		Pc, Mn, Bc, Qs	WA931954 - RG, WA3770259 - DA (Tucurui), WA2117825 - AC (Novo Repartimento), WA1178835 - IT (Goianesia), S63290895, S63339186 - DA, S63631389, S63339186 - DF, S63291446, S63339866 - FF, S66125685 - FB (Tucurui)	resident	on both banks	on rigth bank	Tape-recorded/Photographed (after capture by mistnet)	sg, w	t, u, ef	s	se	Least Concern
542	Saltator maximus (Statius Muller, 1776)	MPEG 1907 (Arumateua), 1910 (Baiao), 1978 (Tucurui, left bank, Sitio Calandrini), 1984 (Tucurui, left bank, Jacunda and Vila Temporaria I); MCZ 1933 (Cameta)	PIAF 1984	Pc, Bc, Qs	WA1351930 - DF (Tucurui), S63472212 - DA, S63631395 - DF, S63218971 - FF (Tucurui)	resident	on both banks	on both banks	Tape-recorded	sg, f	m	s	om	Least Concern
543	Saltator coerulescens Vieillot, 1817	MPEG 1907 (Arumateua), 1984 (Tucurui, left bank, Vila Temporaria I and right bank, Canoal)	PIAF 1984; Operação Curupira 1984	Pc, Bc, Qs	WA929487 - RG, WA938755 - RG, WA3254351 - JV, WA3285370 - JV (Tucurui), S51858622, S51874251* - JV, S63290895, S63339186 - DA, S63631389, S63339186 - DF, S63291446, S63339866 - FF (Tucurui)	resident	on both banks	on left bank		sg, w	m	s	om	Least Concern
544	Saltator grossus (Linnaeus, 1766)	MPEG 1907 (Arumateua), 1910 (Baiao), 1912 (Arumateua)		Pc, Mn, Bc, Qs	WA3220601 - DF (Tucurui), WA1182994 - IT, WA1165970 - NM, WA1163808 - AL (Goianesia)	resident	on both banks	on both banks	Tape-recorded/Photographed (after capture by mistnet)	f	m	s, mf, cf	om	Least Concern
545	CARDINALIDAE
546	Habia rubica (Vieillot, 1817)	MPEG 1984 (Tucurui, left bank, Jacunda)	PIAF 1984	Mn, Qs		resident	on left bank	on left bank	Photographed (after capture by mistnet)	f	m	uf, cf	om	Least Concern					x
547	Granatellus pelzelni Sclater, 1865	MPEG 1907 (Arumateua), 1910 (Baiao), 1916 (Cameta); AMNH 1910 (Baiao), 1931 (Mocajuba)		Pc, Qs	WA14582 - SD, WA33536 - SD, XC13189 - SD (UHE Tucurui Reservoir), WA2624563 - SD, WA2222576 - AG (Novo Repartimento), WA1340197 - AL (Goianesia), XC155511 - AL (Goianesia)	resident	on both banks	on both banks	Tape-recorded/Photographed	f	m, c	s, uf, cf	ar	Least Concern
548	Cyanoloxia rothschildii (Bartlett, 1890)	MPEG 1911 (Cameta), 1916 (Cameta, Fazenda Vaicajo), 1978 (Tucurui, left bank, Sitio Calandrini), 1984 (Tucurui, left bank, Jacunda and Vale do Caraipe, and right bank, Canoal and Ilha Tocantins); AMNH 1931 (Baiao and Mocajuba)	PIAF 1984	Pc, Mn, Bc, Qs	XC6665 - SD, XC6559 - SD (UHE Tucurui Reservoir), XC213014 - GL (Novo Repartimento), S63464378 - DA, S63631381 - DF, S63472212 - FF (Tucurui)	resident	on both banks	on both banks	Tape-recorded/Photographed (after capture by mistnet)	f	u	s	om	Least Concern
549	FRINGILLIDAE
550	Euphonia violacea (Linnaeus, 1758)	MPEG 1907 (Arumateua), 1910 (Igarape Pirinum), 1912 (Arumateua), 1916 (Cameta, Fazenda Vaicajo and Campo de Pucurijo), 1978 (Tucurui, left bank, Sitio Calandrini), 1984 (Tucurui, Ilha Tocantins)		Pc, Mn, Qs	WA3648463 - DA (Tucurui), S63203184, S63218830, S63290895, S63464378* - DA, S63631395, S63631389, S63631381 - DF, S63203209, S63218971, S63291446, S63472212 - FF (Tucurui)	resident	on both banks	on both banks		f, sg	c, ef	s, cf, mf	fr	Least Concern
551	Euphonia minuta Cabanis, 1849	MPEG 1907 (Arumateua), 1910 (Baiao), 1916 (Cameta)				resident	on both banks			f	c	cf	om	Least Concern
552	PASSERIDAE
553	Passer domesticus (Linnaeus, 1758)	MPEG 1985 (Maraba)			WA657751 - YF (Tucurui), WA2531003 - AN (Nova Ipixuna), S51874251 - JV, S59204910, S66125685 - FF (Tucurui)	invasive	not expected			ci	ci	s, mf	om	Least Concern

## Sheet: Legend for Appendix 1
Appendix 1. Checklist of Tucuruí Hydroelectric Reservoir Avifauna
Legend:
Museum: Acronym of the museum followed by the year and, in brackets, of the collection point. MPEG: Museu Paraense Emílio Goeldi; AMNH: American Museum of Natural History; MCZ Museum of Comparative Zoology; FMNH (Field Museum of Natural History; ZMB: Natural History Museum, Berlin.
ELN 1985: PIAF 1984 (Eletronorte. 1985a. Plano de Enchimento do Reservatório: Fauna - Projetos Faunísticos em Tucuruí. Brasília. vol. 1.); Operação Curupira 1984 (Eletronorte. 1985b. Plano de Enchimento do Reservatório: Fauna – Análise da Operação Curupira. Brasília. vol. 2).
Henriques et al. 2005-2007: Pc (Point count); Mn (Mist net); Bc (Boat census); Qs (Qualitative survey).
Digital records: Acronym of the digital base (WA for WikiAves and XC for xeno-canto), record number, initials of the record author and, in brackets, record municipality. CC: Cesar Cestari; CE: Carlos Estevez; DC: Diogo Chernieski; DF: Dnilson Ferraz; DM: Danilo Mota; FF: Fernando Filho; FP: Fernando Praynha; FR: Francielly Reis; GC: Geanice Cristina; GS: Gustavo Sigal; JS: Jabez Soares; LC: Leand…
Habitat: f –forest; w – open areas near water (beaches and rock outcrops seasonally flooded); sg – secondary growth; pl – plantations; oa – open areas; w – water or near water; ci – city.
Microhabitat: w – near water; c – canopy; m – midstory; u – understory; t – terrestrial; ef – edge forest; a – aerial; tf – treefall.
Sociality: s – solitary or pair; cf – canopy heterospecific flocks; uf - understory heterospecific flocks; mf – monospecific flocks; l – leks.
Diet: fr – fruits, ar – arthropods, ca – carrion, ve – vertebrates, fi – fish, se – seeds, om – fruits, seeds and arthropods, mo – mollusks, ni – nectar and small insects; fo – leaves.
IUCN Red List IUCN (2019): The IUCN Red List of Threatened Species. Available at http://www.iucnredlist.org (accessed December 2019)).
Brazil Red List (ICMBio. 2018): Livro Vermelho da Fauna Brasileira Ameaçada de Extinção: Volume III – Aves. In: Instituto Chico Mendes de Conservação da Biodiversidade (Org.). Livro Vermelho da Fauna Brasileira Ameaçada de Extinção. Brasilia: ICMBio. 709p.
Photographers and collaborators of WikiAves, xeno-canto and e-Bird:
AC: Ademir Carletti
AG: Andre Grassi
AL: Alexander Lees
AN: Antonio Carlos Neves
CC: Cesar Cestari
CE: Carlos Bizarro Esteves
CK: Carlos Krasper
DA: Danielson Aleixo
DC: Diogo Chernieski
DF: Dnilson Ferraz
DM: Danilo Mota
EF: Edesio Felix
EM: Erica Mota
EnM: Enoque Moraes
FA: Felipe Arantes
FB: Flavia Barros
FF: Fernanda Freitas
FF: Fernando Filho
FP: Fernanda Praynha
FR: Francielly Reis
GB: Gabriel Leite
GC: Geanice Cristina
Gse: Guilherme Serpa
GSi: Gustavo Sigal
IT: Ian Thompson
JA:Juan Anza
JS: Jabez Soares
JV: Joao Vitor Andriola
KO: Kurazo Okada
LC: Leandro Correa
LCa: Lorena Castilho
LF: Leticia Ferreira
LfM: Luiz Fernando Matos
LM:Luiza Mota
LoF: Lorenna Ferreira
LuF: Luciano Faria
LuM: Luana Monteiro
MF: Marco Freitas
MT: Magno Travassos
NM: Nargila Moura
NW: Neuder Wesley
RC: Rodrigo Y Castro
RCz: Robson Czaban
RG: Rafael Grisostenes
SD: Sidnei Dantas
TD: Tulio Dornas
YF: Yanna Fernanda

## Sheet: S1. Hypothetical_specieslistTHR
Species	Museum (other studies)	Digital Vouchers (other studies/WikiAves and xeno-canto)	Expected occurrence on Tocantins River	IUCN Red List	Brazil Red List	Forest dependecy
SPECIES RECORDED ON LOWER TOCANTINS RIVER
Procellaria aequinoctialis Linnaeus, 1758	MPEG 1937 (Cametá)		not expected	Vulnerable		does not normally occur in forest
Geranospiza caerulescens (Vieillot, 1817)	MCZ 1920 (Rio Tocantins)		both banks	Least Concern		low
Bartramia longicauda (Bechstein, 1812)	MPEG 1910 (Baião)		both banks	Least Concern		does not normally occur in forest
Patagioenas plumbea (Vieillot, 1818)	AMNH 1931 (Baião)		both banks	Least Concern		medium
Neomorphus geoffroyi (Temminck, 1820)	AMNH 1931 (Baião)		both banks	Vulnerable	VU	medium
Hydropsalis torquata (Gmelin, 1789)	MPEG 1916 (Cametá, Fazenda Vaicajó and Campo de Pucurijó)		not expected	Least Concern		does not normally occur in forest
Discosura longicaudus (Gmelin, 1788)	MPEG 1911 (Cametá); AMNH 1931 (Mocajuba)		both banks	Least Concern		medium
Calliphlox amethystina (Boddaert, 1783)	MPEG 1911 (Cametá); AMNH 1931 (Mocajuba)		both banks	Least Concern		medium
Brachygalba lugubris (Swainson, 1838)	MPEG 1910 (Baião); AMNH 1931 (Baião)		both banks	Least Concern		medium
Piculus paraensis (Snethlage, 1907)	AMNH 1931 (Baião)	WA1177951 - IT, WA1164785 - NM, WA1162079 - AL (Goianesia)	rigth bank	Least Concern	EN	medium
Brotogeris versicolurus (Statius Muller, 1776)	MPEG 1910 (Baião)		not expected	Least Concern		low
Thamnophilus nigrocinereus Sclater, 1855	MPEG 1911 (Igarapé Itacuna); MCZ 1932 (Cametá)		both banks	Near threatened		high
Myrmoborus lugubris (Cabanis, 1847)	AMNH 1931 (Baião)		not expected, probably an error	Vulnerable
Berlepschia rikeri (Ridgway, 1886)	AMNH 1931 (Ilha do Taiúna)		both banks	Least Concern		medium
Cranioleuca gutturata (d'Orbigny & Lafresnaye, 1838)	MPEG 1910 (Igarapé Pirinum)		both banks	Least Concern		high
Oxyruncus cristatus Swainson, 1821	AMNH 1931 (Baião)		rigth bank	Least concern		high
Cotinga cayana (Linnaeus, 1766)	MPEG 1912 (Mazagão); AMNH 1912 (Mazagão), 1931 (Baião and Mocajuba)	WA2224876 - AG (Novo Repartimento), S63339186 - DA, S63339186 - DF, S63339866 - FF (Tucurui)	both banks	Least Concern		high
Xipholena lamellipennis (Lafresnaye, 1839)	MPEG 1910 (Baião), 1911 (Cametá), 1912 (Mazagão), 1916 (Cametá, Fazenda Vaicajó); AMNH 1931 (Baião and Mocajuba)	WA1167075 - NM (Goianesia)	both banks	Near Threatened		high
Tityra cayana (Linnaeus, 1766)	MPEG 1910 (Baião), 1916 (Cametá)	WA1184553 - (Goianesia)	both banks	Least Concern		medium
Tolmomyias assimilis (Pelzeln, 1868)	MPEG 1911 (Cametá)	WA1434117 - GC (Novo Repartimento)	both banks	Least Concern		high
Hemitriccus minimus (Todd, 1925)	MPEG 1911 (Cametá)		left bank	Least Concern		medium
Ramphotrigon ruficauda (Spix, 1825)	AMNH 1931 (Mocajuba)		both banks	Least Concern		medium
Myiarchus tyrannulus (Statius Muller, 1776)	MPEG 1916 (Cametá, Campo de Pucurijó)	S63290895 - DA, S63631389 - DF, S63291446 - FF (Tucurui)	both banks	Least Concern		medium
Tyrannopsis sulphurea (Spix, 1825)	AMNH 1931 (Baião and Mocajuba)		both banks	Least Concern		medium
Tersina viridis (Illiger, 1811)	MPEG 1916 (Cametá)		both banks	Least Concern		medium
Tangara punctata (Linnaeus, 1766)	MPEG 1916 (Cametá, Fazenda Vaicajó)		both banks	Least Concern		medium
Eucometis penicillata (Spix, 1825)	MPEG 1910 (Igarapé Boca do Manapiri), 1911 (Cametá); AMNH 1910 (Rio Tocantins), 1931 (Ilha do Taiúna)		both banks	Least Concern		low
Thlypopsis sordida (d’Orbigny & Lafresnaye, 1837)	AMNH 1931 (Baião)		both banks	Least Concern		medium
Caryothraustes canadensis (Linnaeus, 1766)	MPEG 1910 (Baião); AMNH 1931 (Baião and Mocajuba)		rigth bank	Least Concern		high
SPECIES RESTRICTED TO SAVANNA HABITATS RECORDED ON LOWER TOCANTINS RIVER
Nannochordeiles pusillus (Gould, 1861)	AMNH 1931 (Baião)		not expected	Least Concern		does not normally occur in forest
Formicivora rufa (Wied, 1831)	MPEG 1916 (Cametá, Fazenda Vaicajó and Campo de Pucurijó)		not expected			does not normally occur in forest
Xenopipo atronitens Cabanis, 1847	AMNH 1931 (Mocajuba)		both banks	Least Concern		medium
Elaenia cristata Pelzeln, 1868	MCZ 1933 (Cametá)		both banks	Least Concern		does not normally occur in forest
Zonotrichia capensis (Statius Muller, 1776)	MPEG 1916 (Cametá, Fazenda Vaicajó and Campo de Pucurijó); CM 1931 (Baião)		both banks	Least Concern		does not normally occur in forest
Sturnella magna (Linnaeus, 1758)	MPEG 1916 (Cametá, Fazenda Vaicajó and Campo de Pucurijó)		not expected	Least Concern		does not normally occur in forest
Schistochlamys melanopis (Latham, 1790)	MPEG 1916 (Cametá, Campo de Pucurijó)	WA1167073 - NM (Goianesia), S63290895 - DA, S63631389 - DF, S63291446 - FF (Tucurui)	both banks	Least Concern		does not normally occur in forest
SPECIES RECORDED ON MUNICIPALITY OF MARABÁ
Crax fasciolata pinima Pelzeln, 1870	MPEG 1955 (Marabá)		rigth bank	Critically Endangered	CR	high
Hypocnemoides maculicauda (Pelzeln, 1868)	MCZ 1920 (Marabá)		both banks	Least Concern		high
Pyrocephalus rubinus (Boddaert, 1783)	MCZ 1920 (Marabá)		both banks	Least Concern		low
Knipolegus orenocensis Berlepsch, 1864	MPEG 1920 (Marabá)		rigth bank	Least Concern		does not normally occur in forest
Sicalis flaveola (Linnaeus, 1766)	MCZ 1920 (Marabá)	S63290895 - DA, S63631389 - DF, S63291446 - FF (Tucurui)	not expected	Least Concern		does not normally occur in forest
Sporophila caerulescens (Vieillot, 1823)	MPEG 1920 (Marabá, Sítio Floresta)		both banks	Least Concern		does not normally occur in forest
SPECIES RECORDED ON LOWER TOCANTINS RIVER AND ON MUNICIPALITY OF MARABÁ
Fluvicola albiventer (Spix, 1825)	MCZ 1920 (Marabá); AMNH 1931 (Baião)		both banks	Least Concern		does not normally occur in forest
Ammodramus humeralis (Bosc, 1792)	MPEG 1916 (Cametá, Campo de Pucurijó); MCZ 1920 (Marabá)	WA2117883 - AC (Novo Repartimento)	both banks	Least Concern		does not normally occur in forest
SPECIES RECORDED FOR TUCURUÍ DAM AREA WITHOUT PERMANENT EVIDENCE
Jabiru mycteria (Lichtenstein, 1819)		Recorded by Nivia Carmo in a qualitative surveying	not expected	Least Concern		does not normally occur in forest
Hydropsalis maculicaudus (Lawrence, 1862)		Recorded by Sidnei Dantas in a qualitative surveying	not expected	Least Concern		does not normally occur in forest
Primolius maracana (Vieillot, 1816)		WA914277 - LF (Jacunda), S63290895 - DA, S63631389 - DF, S63291446 - FF (Tucurui)	not expected	Near threatened		medium
Laterallus exilis (Temminck, 1831)		S63290895 - DA, S6363138 - DF, S63291446 - FF Tucurui)	both banks	Least Concern		low
Ciconia maguari (Gmelin, 1789)		S63339186 - DA, S63339186 - DF, S63339866 - FF (Tucurui)	not expected	Least Concern		does not normally occur in forest
SPECIES RECORDED ON MUNICIPALITIES AROUND TUCURUÍ DAM AREA
Anhima cornuta (Linnaeus, 1766)		WA1143237 - GC (Itupiranga)	both banks	Least Concern		does not normally occur in forest
Tachybaptus dominicus (Linnaeus, 1766)		WA1179983 - IT, WA1165960 - NM (Goianesia)	both banks	Least Concern		does not normally occur in forest
Leptodon cayanensis (Latham, 1790)		WA1184542 - IT, WA1167074 - NM (Goianesia)	both banks	Least Concern		medium
Leucopternis melanops (Latham, 1790)		WA1181929 - IT, WA1164787 - NM, WA1162088 - AL, XC155500 (Goianesia)	both banks	Least Concern		high
Dendrocolaptes picumnus Lichtenstein, 1820		WA2222542 - AG (Novo Repartimento)	left bank	Least Concern		high
Xiphocolaptes carajaensis Silva, Novaes & Oren, 2002		WA2224882 - AG (Novo Repartimento)	left bank	Least Concern		high
Synallaxis cherriei Gyldenstolpe, 1930		WA2218112 - AG, WA1608117 - GL (Novo Repartimento)	not expected	Near threatened		medium
Philydor erythropterum (Sclater, 1856)		WA1177959 - IT, WA1162073 - AL (Goianesia)	not expected	Least Concern		high
Phylloscartes virescens Todd, 1925		WA1546116 - AL (Goianesia)	not expected	Least Concern		high
Poecilotriccus capitalis (Sclater, 1857)		WA2858614 - GL, WA2627614 - SD, WA221811 - AG (Novo Repartimento)	left bank	Least Concern		high
Myiozetetes luteiventris (Sclater, 1858)		WA2224883 - AG, WA1633843 - GC (Novo Repartimento)	not expected	Least Concern		medium
Griseotyrannus aurantioatrocristatus (d’Orbigny & Lafresnaye, 1837)		WA2625464 - SD (Novo Repartimento), WA119633 - GSe (Goianesia)	both banks	Least Concern		low
Fluvicola nengeta (Linnaeus, 1766)		WA1181867 - IT, WA1164797 - NM (Goianesia)	both banks	Least Concern		does not normally occur in forest
Contopus cooperi (Nuttall, 1831)		WA1165958 - NM (Goianesia)	both banks	Least Concern		low
Atticora tibialis (Cassin, 1853)		WA1178840 - IT, WA1162101 - AL (Goianesia)	both banks	Least Concern		does not normally occur in forest
Parkerthraustes humeralis (Lawrence, 1867)		WA2222582 - AG (Novo Repartimento)	not expected	Least Concern		high
Tangara velia (Linnaeus, 1758)		WA1184551 - IT (Goianesia)	both banks	Least Concern		medium
Dacnis lineata (Gmelin, 1789)		WA1184612 - IT (Goianesia)	both banks	Least Concern		high

## Sheet: S2_Promethee_method
Species	Forest dependency (BirdLife Data Zone): Weigth Scenario 1=1, Scenario 2=0.3; Minimize; Preference Fn. Usual; Scale high=1, medium=2, low=3, Does not normally occurs in forest=4	Extent of occurrence (Km2) (BirdLife Data Zone): Weigth Scenario 1=1, Scenario 2=0.1; Minimize; Preference Fn. Linear	Abundance: Weigth Scenario 1=1, Scenario 2=0.3; Minimize; Preference Fn. Usual; Scale absent=0, uncommon=1, common=2	Expected occurrence vs. Observed occurrence: Weigth Scenario 1=1, Scenario 2=0.3; Maximize; Preference Fn. Usual; Scale not expected=0, expected on both banks and recorded on both banks=1, expected on one bank and recorded on one bank=2, expected on both banks and recorded on one bank=3, expected on both banks and not recorded=4; expected on one bank and not recorded=5	Number of historical localities with records on lower Tocantins River	Number of forest islands and stretches of reservoir margins with records	Rank (Scenario 1)	Phi	Phi+	Phi-	Rank (Scenario 2)	Phi	Phi+	Phi-
Myrmelastes rufifacies	high	671000	absent	expected on one bank and not recorded	2	0	1	0.8842	0.8889	0.0047	1	0.8718	0.8737	0.0019
Psophia interjecta	high	1160000	absent	expected on one bank and not recorded	2	0	2	0.8716	0.8826	0.0111	2	0.8667	0.8712	0.0044
Epinecrophylla leucophthalma	high	3340000	absent	expected on one bank and not recorded	4	0	3	0.8358	0.8647	0.0289	3	0.852	0.8638	0.0118
Piculus leucolaemus	high	3590000	absent	expected on one bank and not recorded	1	0	4	0.8337	0.8637	0.03	4	0.8512	0.8634	0.0122
Phoenicircus carnifex	high	1630000	absent	expected on both banks and not recorded	2	0	5	0.8332	0.8553	0.0221	6	0.8274	0.8417	0.0143
Sakesphorus luctuosus	high	2120000	uncommon	expected on both banks and not recorded	7	0	6	0.8279	0.8526	0.0247	26	0.5836	0.6314	0.0478
Hylophylax punctulatus	high	4920000	absent	expected on one bank and not recorded	2	0	7	0.8126	0.8532	0.0405	5	0.8427	0.8592	0.0164
Avocettula recurvirostris	high	5000000	absent	expected on both banks and not recorded	2	0	8	0.7795	0.8284	0.0489	8	0.8055	0.8307	0.0253
Myrmornis torquata	high	5100000	absent	expected on both banks and not recorded	3	0	9	0.7774	0.8274	0.05	9	0.8046	0.8303	0.0257
Vireolanius leucotis	high	6560000	absent	expected on one bank and not recorded	1	0	10	0.7584	0.8258	0.0674	7	0.8211	0.8482	0.0272
Psarocolius viridis	high	6170000	absent	expected on both banks and not recorded	2	0	11	0.7453	0.8111	0.0658	10	0.7918	0.8238	0.032
Philydor pyrrhodes	high	6600000	absent	expected on both banks and not recorded	4	0	12	0.7242	0.8005	0.0763	11	0.7834	0.8196	0.0362
Anabacerthia ruficaudata	high	6860000	absent	expected on both banks and not recorded	1	0	13	0.7142	0.7958	0.0816	12	0.7794	0.8177	0.0383
Pyrrhura anerythra	medium	585000	uncommon	expected on one bank and not recorded	1	0	14	0.7084	0.7837	0.0753	65	0.4179	0.5375	0.1196
Automolus rufipileatus	high	7040000	absent	expected on both banks and not recorded	2	0	15	0.7074	0.7921	0.0847	13	0.7766	0.8162	0.0396
Zebrilus undulatus	high	7100000	absent	expected on both banks and not recorded	1	0	16	0.7037	0.79	0.0863	14	0.7752	0.8154	0.0402
Conopophaga melanogaster	medium	1140000	absent	expected on one bank and not recorded	1	0	17	0.6947	0.7768	0.0821	18	0.6537	0.7438	0.0901
Corythopis torquatus	high	7330000	absent	expected on both banks and not recorded	1	0	18	0.6926	0.7847	0.0921	15	0.7707	0.8133	0.0425
Campylorhamphus multostriatus	high	432000	absent	expected on one bank and not recorded	2	0	19	0.6884	0.72	0.0316	21	0.6326	0.6657	0.0331
Accipiter poliogaster	high	7490000	absent	expected on both banks and not recorded	1	0	20	0.6858	0.7816	0.0958	16	0.768	0.812	0.044
Hylopezus berlepschi	medium	2670000	absent	expected on one bank and not recorded	1	0	21	0.6716	0.7653	0.0937	19	0.644	0.7389	0.0949
Pyrilia vulturina	medium	1030000	absent	expected on both banks and not recorded	4	0	22	0.67	0.7563	0.0863	22	0.6198	0.7171	0.0973
Lophornis gouldii	medium	1290000	absent	expected on both banks and not recorded	1	0	23	0.6595	0.7511	0.0916	23	0.6156	0.7149	0.0994
Nonnula ruficapilla	medium	3720000	absent	expected on one bank and not recorded	1	0	24	0.6526	0.7558	0.1032	20	0.6364	0.7352	0.0987
Hypocnemoides melanopogon	medium	4670000	absent	expected on both banks and not recorded	5	0	25	0.6116	0.7268	0.1153	24	0.596	0.7051	0.1091
Chiroxiphia pareola	high	10900000	absent	expected on both banks and not recorded	5	0	26	0.5937	0.7353	0.1416	17	0.7312	0.7935	0.0623
Psarocolius bifasciatus	high	178000	uncommon	expected on both banks and recorded on one bank	1	2	27	0.5847	0.6442	0.0595	37	0.5048	0.5731	0.0682
Lepidothrix iris	high	983000	uncommon	expected on both banks and recorded on one bank	2	3	28	0.57	0.6368	0.0668	39	0.4989	0.5701	0.0712
Myrmotherula multostriata	medium	6140000	absent	expected on both banks and not recorded	3	0	29	0.5689	0.7058	0.1368	27	0.5789	0.6966	0.1177
Pachyramphus viridis	medium	6260000	absent	expected on both banks and not recorded	1	0	30	0.5637	0.7032	0.1395	90	0.3356	0.4865	0.1509
Deconychura longicauda	high	1170000	uncommon	expected on both banks and recorded on one bank	1	1	31	0.5616	0.6326	0.0711	41	0.4956	0.5684	0.0728
Pionites leucogaster	high	2140000	uncommon	expected on both banks and recorded on one bank	2	2	32	0.5479	0.6258	0.0779	43	0.4897	0.5655	0.0758
Selenidera gouldii	high	2610000	uncommon	expected on both banks and recorded on one bank	5	1	33	0.5416	0.6226	0.0811	44	0.4872	0.5642	0.0771
Myrmoborus leucophrys	medium	7440000	uncommon	expected on one bank and not recorded	7	0	34	0.54	0.6995	0.1595	86	0.3501	0.5036	0.1535
Nasica longirostris	medium	6830000	absent	expected on both banks and not recorded	2	0	35	0.5374	0.69	0.1526	28	0.5663	0.6903	0.124
Aburria cujubi	high	2810000	uncommon	expected on both banks and recorded on one bank	0	3	36	0.5363	0.62	0.0837	45	0.4851	0.5632	0.0781
Pionus fuscus	high	2850000	uncommon	expected on both banks and recorded on one bank	1	1	37	0.5347	0.6189	0.0842	46	0.4844	0.5627	0.0783
Picumnus cirratus	medium	7630000	absent	expected on one bank and not recorded	3	0	38	0.5295	0.6942	0.1647	25	0.5872	0.7105	0.1234
Xiphorhynchus obsoletus	medium	7100000	absent	expected on both banks and not recorded	5	0	39	0.5258	0.6837	0.1579	29	0.5617	0.6878	0.1261
Atticora fasciata	medium	7260000	absent	expected on both banks and not recorded	1	0	40	0.5189	0.6805	0.1616	30	0.5589	0.6865	0.1276
Picumnus aurifrons	high	3870000	uncommon	expected on both banks and recorded on one bank	3	0	41	0.5184	0.6111	0.0926	49	0.4779	0.5596	0.0817
Micrastur mintoni	high	4110000	uncommon	expected on both banks and recorded on one bank	1	4	42	0.5163	0.61	0.0937	50	0.4771	0.5592	0.0821
Nyctiprogne leucopyga	medium	7290000	absent	expected on both banks and not recorded	1	0	42	0.5163	0.6795	0.1632	31	0.5579	0.6861	0.1282
Psophia obscura	high	241000	uncommon	expected on both banks and recorded on both banks	2	1	44	0.5068	0.6216	0.1147	66	0.4122	0.5463	0.1341
Platyrinchus saturatus	high	4810000	uncommon	expected on both banks and recorded on one bank	1	3	45	0.5063	0.6047	0.0984	51	0.4731	0.5571	0.084
Nystalus torridus	high	4870000	uncommon	expected on both banks and recorded on one bank	1	3	46	0.5047	0.6042	0.0995	52	0.4724	0.5568	0.0844
Conopophaga aurita	high	674000	uncommon	expected on one bank and recorded on one bank	5	6	47	0.4974	0.6168	0.1195	69	0.4084	0.5444	0.136
Conopophaga roberti	high	730000	uncommon	expected on both banks and recorded on both banks	3	11	48	0.4953	0.6158	0.1205	70	0.4076	0.544	0.1364
Elaenia chilensis	medium	8350000	absent	expected on both banks and not recorded	1	0	49	0.4868	0.6647	0.1779	32	0.5461	0.6802	0.1341
Iodopleura isabellae	high	5720000	uncommon	expected on both banks and recorded on one bank	2	0	50	0.4826	0.5932	0.1105	54	0.4636	0.5524	0.0888
Epinecrophylla ornata	high	1420000	uncommon	expected on one bank and recorded on one bank	4	17	51	0.4784	0.6074	0.1289	72	0.4008	0.5406	0.1398
Cyanerpes caeruleus	medium	8780000	absent	expected on both banks and not recorded	1	0	52	0.4774	0.66	0.1826	33	0.5423	0.6783	0.136
Glaucidium hardyi	high	6100000	uncommon	expected on both banks and recorded on one bank	0	2	53	0.47	0.5868	0.1168	55	0.4585	0.5499	0.0914
Turdus fumigatus	medium	9530000	absent	expected on both banks and not recorded	5	0	54	0.4574	0.65	0.1926	34	0.5343	0.6743	0.14
Tangara gyrola	medium	9790000	absent	expected on both banks and not recorded	1	0	55	0.4547	0.6484	0.1937	35	0.5333	0.6737	0.1404
Cranioleuca vulpina	medium	9720000	uncommon	expected on both banks and not recorded	5	0	55	0.4547	0.6484	0.1937	99	0.292	0.4646	0.1726
Pygiptila stellaris	high	6490000	uncommon	expected on both banks and recorded on one bank	3	1	57	0.4547	0.5789	0.1242	56	0.4524	0.5467	0.0943
Euphonia minuta	medium	9820000	absent	expected on both banks and not recorded	2	0	58	0.4474	0.6447	0.1974	36	0.5303	0.6722	0.1419
Lanio versicolor	high	3730000	uncommon	expected on one bank and recorded on one bank	2	3	59	0.4437	0.59	0.1463	75	0.3865	0.5335	0.1469
Crypturellus strigulosus	high	4650000	uncommon	expected on one bank and recorded on one bank	2	3	60	0.4353	0.5858	0.1505	76	0.3832	0.5318	0.1486
Phlegopsis nigromaculata	high	6080000	uncommon	expected on both banks and recorded on one bank	7	4	61	0.4311	0.5668	0.1358	57	0.4429	0.5419	0.0989
Pachysylvia hypoxantha	high	4980000	uncommon	expected on one bank and recorded on one bank	0	3	62	0.4247	0.5805	0.1558	78	0.3789	0.5297	0.1507
Thamnophilus schistaceus	high	5160000	uncommon	expected on one bank and recorded on one bank	4	9	63	0.4205	0.5784	0.1579	79	0.3773	0.5288	0.1516
Hemitriccus griseipectus	high	5220000	uncommon	expected on one bank and recorded on one bank	1	4	64	0.4184	0.5774	0.1589	80	0.3764	0.5284	0.152
Pachyramphus minor	high	7380000	uncommon	expected on both banks and recorded on one bank	2	1	65	0.4121	0.5579	0.1458	58	0.4354	0.5383	0.1029
Sclerurus macconnelli	high	14800000	uncommon	expected on both banks and recorded on one bank	2	1	66	0.4111	0.5574	0.1463	59	0.4349	0.5381	0.1032
Gymnoderus foetidus	high	7480000	uncommon	expected on both banks and recorded on one bank	1	1	67	0.4079	0.5558	0.1479	60	0.4337	0.5375	0.1038
Celeus elegans	high	7570000	uncommon	expected on both banks and recorded on one bank	0	2	68	0.4047	0.5542	0.1495	61	0.4324	0.5368	0.1044
Megascops usta	high	7600000	uncommon	expected on both banks and recorded on one bank	3	1	69	0.4026	0.5526	0.15	62	0.4316	0.5362	0.1046
Hylocharis sapphirina	medium	10800000	uncommon	expected on both banks and recorded on one bank	1	1	70	0.3889	0.5289	0.14	101	0.2842	0.4419	0.1577
Microcerculus marginatus	high	8480000	uncommon	expected on both banks and recorded on one bank	2	2	71	0.3816	0.5426	0.1611	63	0.4232	0.5322	0.1091
Heliomaster longirostris	medium	12700000	absent	expected on both banks and not recorded	1	0	72	0.3774	0.6095	0.2321	38	0.5023	0.6581	0.1558
Sirystes sibilator	high	6510000	uncommon	expected on both banks and recorded on both banks	1	1	73	0.3763	0.5563	0.18	81	0.3596	0.52	0.1604
Aratinga jandaya	medium	1910000	uncommon	expected on both banks and recorded on one bank	0	0	74	0.3742	0.5216	0.1474	102	0.2783	0.4389	0.1606
Gymnomystax mexicanus	does not normally occur in forest	5490000	absent	expected on both banks and not recorded	3	0	75	0.37	0.6437	0.2737	92	0.3234	0.6137	0.2903
Myrmoborus myotherinus	high	6590000	uncommon	expected on one bank and recorded on one bank	9	5	75	0.37	0.5532	0.1832	82	0.3571	0.5187	0.1617
Jacamerops aureus	high	8930000	uncommon	expected on both banks and recorded on one bank	1	3	77	0.3689	0.5363	0.1674	64	0.4181	0.5297	0.1116
Myiobius atricaudus	medium	13100000	absent	expected on both banks and not recorded	2	0	78	0.3668	0.6042	0.2374	40	0.4981	0.656	0.1579
Myiopagis caniceps	high	6650000	uncommon	expected on both banks and recorded on both banks	0	3	79	0.3658	0.5511	0.1853	83	0.3554	0.5179	0.1625
Serpophaga hypoleuca	does not normally occur in forest	5690000	absent	expected on both banks and not recorded	1	0	80	0.3653	0.6411	0.2758	93	0.3215	0.6126	0.2912
Myrmotherula brachyura	high	6790000	uncommon	expected on one bank and recorded on one bank	2	2	81	0.3611	0.5484	0.1874	84	0.3535	0.5168	0.1634
Hylophylax naevius	high	6790000	uncommon	expected on one bank and recorded on one bank	7	5	81	0.3611	0.5484	0.1874	84	0.3535	0.5168	0.1634
Manacus manacus	medium	13300000	absent	expected on both banks and not recorded	5	0	83	0.3595	0.6	0.2405	42	0.4952	0.6543	0.1592
Anodorhynchus hyacinthinus	medium	2850000	uncommon	expected on both banks and recorded on one bank	0	3	84	0.3568	0.5126	0.1558	103	0.2709	0.4352	0.1642
Sclerurus caudacutus	high	9780000	uncommon	expected on both banks and recorded on one bank	3	1	85	0.3505	0.5268	0.1763	67	0.4107	0.5259	0.1152
Guaruba guarouba	high	516000	uncommon	expected on both banks and recorded on both banks	1	19	86	0.3489	0.4884	0.1395	116	0.2269	0.3886	0.1617
Pachyramphus validus	high	9800000	uncommon	expected on both banks and recorded on one bank	0	1	87	0.3489	0.5263	0.1774	68	0.4101	0.5257	0.1156
Myiobius barbatus	high	12000000	common	expected on both banks and recorded on one bank	5	5	88	0.3395	0.5826	0.2432	117	0.2267	0.5088	0.2821
Inezia subflava	medium	4130000	uncommon	expected on both banks and recorded on one bank	7	1	89	0.3374	0.5032	0.1658	104	0.2632	0.4314	0.1682
Lophostrix cristata	high	10200000	uncommon	expected on both banks and recorded on one bank	0	2	90	0.3368	0.5189	0.1821	71	0.4053	0.5227	0.1175
Pteroglossus bitorquatus	high	1110000	uncommon	expected on both banks and recorded on both banks	2	10	91	0.3358	0.4816	0.1458	122	0.2217	0.3859	0.1642
Cnemotriccus fuscatus	medium	14600000	absent	expected on both banks and not recorded	1	0	92	0.3321	0.5874	0.2553	47	0.4842	0.6493	0.1651
Penelope pileata	high	1210000	uncommon	expected on both banks and recorded on both banks	2	13	93	0.33	0.4789	0.1489	123	0.2194	0.3848	0.1655
Pyrrhura coerulescens	medium		uncommon	expected on both banks and recorded on both banks	1	1	94	0.3279	0.5147	0.1868	137	0.1983	0.4185	0.2202
Knipolegus poecilocercus	medium	4960000	uncommon	expected on both banks and recorded on one bank	3	1	95	0.3247	0.4968	0.1721	106	0.2581	0.4288	0.1707
Automolus paraensis	high	1940000	uncommon	expected on both banks and recorded on both banks	8	8	96	0.3216	0.4747	0.1532	125	0.216	0.3832	0.1672
Heliothryx auritus	high	10700000	uncommon	expected on both banks and recorded on one bank	4	1	97	0.3189	0.5105	0.1916	73	0.3981	0.5194	0.1213
Cyanerpes cyaneus	medium	15500000	absent	expected on both banks and not recorded	1	0	98	0.3179	0.5795	0.2616	48	0.4785	0.6461	0.1676
Celeus undatus	high	2240000	uncommon	expected on both banks and recorded on both banks	1	3	99	0.3174	0.4726	0.1553	128	0.2139	0.3821	0.1682
Celeus torquatus	high	2540000	uncommon	expected on both banks and recorded on both banks	0	2	100	0.3153	0.4716	0.1563	129	0.2131	0.3817	0.1686
Terenotriccus erythrurus	high	10900000	uncommon	expected on both banks and recorded on one bank	3	4	101	0.3147	0.5089	0.1942	74	0.3964	0.5187	0.1223
Taeniotriccus andrei	high	2590000	uncommon	expected on both banks and recorded on both banks	2	1	102	0.3132	0.4705	0.1574	130	0.2122	0.3813	0.1691
Lanio surinamus	medium	5520000	uncommon	expected on both banks and recorded on one bank	1	1	103	0.3089	0.4889	0.18	107	0.2518	0.4257	0.1739
Hypocnemis striata	medium	1410000	common	expected on one bank and recorded on one bank	7	26	104	0.3021	0.5016	0.1995	143	0.188	0.4133	0.2253
Chlorophanes spiza	medium	16500000	absent	expected on both banks and not recorded	3	0	105	0.3	0.5705	0.2705	53	0.4718	0.6427	0.1709
Leucopternis kuhli	high	3280000	uncommon	expected on both banks and recorded on both banks	1	1	106	0.2995	0.4637	0.1642	131	0.2067	0.3785	0.1718
Picumnus buffonii	medium	5030000	uncommon	expected on both banks and recorded on both banks	0	1	107	0.2953	0.4984	0.2032	145	0.1848	0.4118	0.2269
Catharus fuscescens	medium	2560000	uncommon	expected on both banks and recorded on both banks	0	1	108	0.2889	0.4953	0.2063	148	0.1823	0.4105	0.2282
Pygochelidon melanoleuca	does not normally occur in forest	7500000	absent	expected on both banks and not recorded	3	0	109	0.2868	0.6021	0.3153	100	0.2901	0.5971	0.3069
Bucco tamatia	medium	6240000	uncommon	expected on both banks and recorded on one bank	0	3	110	0.2858	0.4774	0.1916	109	0.2425	0.4211	0.1785
Hylopezus paraensis	high	4380000	uncommon	expected on both banks and recorded on both banks	0	5	111	0.2837	0.4558	0.1721	133	0.2006	0.3754	0.1747
Tangara chilensis	medium	6380000	uncommon	expected on both banks and recorded on one bank	0	0	112	0.2826	0.4758	0.1932	110	0.2413	0.4204	0.1792
Lamprospiza melanoleuca	high	4670000	uncommon	expected on both banks and recorded on both banks	1	5	113	0.2811	0.4542	0.1732	134	0.1994	0.3747	0.1754
Attila cinnamomeus	medium	6400000	uncommon	expected on both banks and recorded on one bank	1	6	114	0.2805	0.4747	0.1942	112	0.2404	0.42	0.1796
Crax fasciolata	high	4720000	uncommon	expected on both banks and recorded on both banks	1	4	115	0.2795	0.4537	0.1742	136	0.1987	0.3745	0.1758
Pauxi tuberosa	high	4810000	uncommon	expected on both banks and recorded on both banks	1	10	116	0.2768	0.4521	0.1753	138	0.1977	0.3739	0.1762
Hylexetastes brigidai	medium	3310000	uncommon	expected on one bank and recorded on one bank	2	2	117	0.2732	0.4874	0.2142	154	0.176	0.4074	0.2314
Piprites chloris	high	12900000	uncommon	expected on both banks and recorded on one bank	0	5	118	0.2721	0.4874	0.2153	77	0.3794	0.5101	0.1307
Dendrocincla merula	medium	6570000	uncommon	expected on both banks and recorded on one bank	3	1	119	0.27	0.4695	0.1995	113	0.2362	0.4179	0.1817
Chlorestes notata	low	10800000	absent	expected on both banks and not recorded	5	0	120	0.27	0.5889	0.3189	88	0.3415	0.6171	0.2756
Lanio cristatus	low	11000000	absent	expected on both banks and not recorded	2	0	121	0.2658	0.5863	0.3205	89	0.3398	0.616	0.2762
Tinamus guttatus	high	5250000	uncommon	expected on both banks and recorded on both banks	1	2	122	0.2647	0.4463	0.1816	140	0.1928	0.3716	0.1787
Deroptyus accipitrinus	high	5470000	uncommon	expected on both banks and recorded on both banks	1	5	123	0.2605	0.4442	0.1837	141	0.1912	0.3707	0.1796
Thamnophilus stictocephalus	high	1410000	common	expected on one bank and recorded on one bank	7	30	124	0.2589	0.5584	0.2995	182	0.1331	0.4815	0.3484
Threnetes leucurus	medium	6920000	uncommon	expected on both banks and recorded on one bank	0	1	125	0.2558	0.4621	0.2063	114	0.2305	0.4149	0.1844
Sclateria naevia	medium	6920000	uncommon	expected on both banks and recorded on one bank	2	2	125	0.2558	0.4621	0.2063	114	0.2305	0.4149	0.1844
Thamnophilus amazonicus	medium	7120000	uncommon	expected on both banks and recorded on one bank	5	7	127	0.2442	0.4563	0.2121	118	0.2259	0.4126	0.1867
Rhynchocyclus olivaceus	high	6050000	uncommon	expected on both banks and recorded on both banks	1	19	128	0.2437	0.4358	0.1921	147	0.1844	0.3674	0.1829
Helicolestes hamatus	medium	7230000	uncommon	expected on both banks and recorded on one bank	0	0	129	0.2416	0.4553	0.2137	119	0.2248	0.4122	0.1874
Thamnophilus palliatus	medium	7260000	uncommon	expected on both banks and recorded on one bank	2	5	130	0.24	0.4542	0.2142	120	0.2242	0.4118	0.1876
Synallaxis gujanensis	medium	7270000	uncommon	expected on both banks and recorded on one bank	6	1	131	0.2384	0.4537	0.2153	121	0.2236	0.4116	0.188
Sclerurus rufigularis	high	6170000	uncommon	expected on both banks and recorded on both banks	2	2	132	0.2368	0.4321	0.1953	149	0.1817	0.3659	0.1842
Hemitriccus minor	high	2920000	common	expected on one bank and recorded on one bank	5	20	133	0.2353	0.5468	0.3116	196	0.1232	0.4766	0.3535
Platyrinchus platyrhynchos	high	6410000	uncommon	expected on both banks and recorded on both banks	3	5	134	0.2279	0.4279	0.2	151	0.1781	0.3642	0.1861
Tyranneutes stolzmanni	high	6540000	uncommon	expected on both banks and recorded on both banks	4	15	135	0.2226	0.4253	0.2026	154	0.176	0.3632	0.1872
Sublegatus obscurior	medium	6030000	uncommon	expected on both banks and recorded on both banks	0	1	136	0.2195	0.4605	0.2411	163	0.1545	0.3966	0.2421
Tangara mexicana	medium	7710000	uncommon	expected on both banks and recorded on one bank	3	3	137	0.2184	0.4437	0.2253	126	0.2156	0.4076	0.192
Hylophilus pectoralis	medium	7790000	uncommon	expected on both banks and recorded on one bank	2	2	138	0.2174	0.4432	0.2258	127	0.2152	0.4074	0.1922
Crypturellus cinereus	high	6630000	uncommon	expected on both banks and recorded on both banks	1	11	139	0.2142	0.4211	0.2068	156	0.1726	0.3615	0.1888
Cercomacroides nigrescens	medium	6120000	uncommon	expected on one bank and recorded on one bank	3	18	139	0.2142	0.4579	0.2437	165	0.1524	0.3956	0.2432
Sporophila americana	low	2770000	uncommon	expected on both banks and recorded on one bank	4	1	141	0.2121	0.4732	0.2611	208	0.0952	0.3865	0.2914
Nemosia pileata	low	13600000	absent	expected on both banks and not recorded	3	0	142	0.2053	0.5563	0.3511	94	0.3156	0.604	0.2884
Ceratopipra rubrocapilla	high	7060000	uncommon	expected on both banks and recorded on both banks	7	7	143	0.1974	0.4126	0.2153	158	0.1659	0.3581	0.1922
Philydor erythrocercum	high	7100000	uncommon	expected on both banks and recorded on both banks	4	17	144	0.1953	0.4111	0.2158	160	0.1651	0.3575	0.1924
Campylopterus largipennis	medium	8980000	uncommon	expected on both banks and recorded on one bank	3	2	145	0.1889	0.4289	0.24	132	0.2038	0.4017	0.1979
Certhiaxis cinnamomeus	low	14400000	absent	expected on both banks and not recorded	4	0	146	0.1874	0.5474	0.36	96	0.3084	0.6004	0.292
Harpagus diodon	high	17350000	uncommon	expected on both banks and recorded on one bank	0	0	147	0.1868	0.4453	0.2584	87	0.3457	0.4935	0.1478
Capsiempis flaveola	low	14500000	absent	expected on both banks and not recorded	3	0	148	0.1858	0.5468	0.3611	97	0.3078	0.6002	0.2924
Elaenia chiriquensis	low	15000000	absent	expected on both banks and not recorded	2	0	149	0.1789	0.5426	0.3637	98	0.3051	0.5985	0.2935
Ortalis superciliaris	low	438000	uncommon	expected on both banks and recorded on both banks	2	1	150	0.1774	0.4721	0.2947	221	0.0202	0.3686	0.3484
Laniocera hypopyrra	medium	9610000	uncommon	expected on both banks and recorded on one bank	3	1	151	0.1774	0.4232	0.2458	135	0.1992	0.3994	0.2002
Ortalis ruficeps	low		uncommon	expected on one bank and recorded on one bank	2	1	152	0.1742	0.4705	0.2963	222	0.0189	0.368	0.3491
Pyrrhura amazonum	medium	392000	uncommon	expected on both banks and recorded on both banks	2	23	152	0.1742	0.3837	0.2095	223	0.0147	0.2617	0.2469
Dendrocolaptes retentus	medium	7040000	uncommon	expected on one bank and recorded on one bank	3	8	154	0.1737	0.4374	0.2637	180	0.1362	0.3874	0.2512
Grallaria varia	medium	9780000	uncommon	expected on both banks and recorded on one bank	0	3	155	0.1726	0.4205	0.2479	139	0.1973	0.3983	0.2011
Granatellus pelzelni	medium	693000	uncommon	expected on both banks and recorded on both banks	3	9	156	0.1658	0.3795	0.2137	224	0.0114	0.26	0.2486
Melanerpes cruentatus	high	7810000	uncommon	expected on both banks and recorded on both banks	2	7	157	0.1642	0.3958	0.2316	164	0.1526	0.3514	0.1987
Tinamus tao	high	8520000	uncommon	expected on both banks and recorded on both banks	0	14	158	0.1505	0.3889	0.2384	168	0.1472	0.3486	0.2015
Amazilia versicolor	medium	10400000	uncommon	expected on both banks and recorded on one bank	0	2	159	0.15	0.4089	0.2589	142	0.1882	0.3937	0.2055
Opisthocomus hoazin	high	8620000	uncommon	expected on both banks and recorded on both banks	5	4	160	0.1489	0.3884	0.2395	170	0.1465	0.3484	0.2019
Chondrohierax uncinatus	high	21600000	uncommon	expected on both banks and recorded on one bank	0	1	161	0.1463	0.4247	0.2784	91	0.3295	0.4853	0.1558
Querula purpurata	high	8790000	uncommon	expected on both banks and recorded on both banks	1	4	162	0.1453	0.3863	0.2411	172	0.1451	0.3476	0.2025
Tunchiornis ochraceiceps	medium	10600000	uncommon	expected on both banks and recorded on one bank	1	4	163	0.1447	0.4063	0.2616	144	0.1861	0.3926	0.2065
Lanio luctuosus	medium	10700000	uncommon	expected on both banks and recorded on one bank	3	2	164	0.1411	0.4042	0.2632	146	0.1846	0.3918	0.2072
Nyctidromus nigrescens	low	6180000	uncommon	expected on both banks and recorded on one bank	2	2	165	0.1395	0.4368	0.2974	214	0.0661	0.372	0.3059
Crypturellus variegatus	high	9010000	uncommon	expected on both banks and recorded on both banks	2	7	166	0.1363	0.3821	0.2458	176	0.1415	0.3459	0.2044
Patagioenas subvinacea	high	9170000	uncommon	expected on both banks and recorded on both banks	2	8	167	0.1332	0.3805	0.2474	177	0.1402	0.3453	0.2051
Cantorchilus leucotis	medium	11200000	uncommon	expected on both banks and recorded on one bank	4	1	168	0.1311	0.3995	0.2684	150	0.1806	0.3899	0.2093
Pachyramphus rufus	low	6440000	uncommon	expected on both banks and recorded on one bank	4	0	168	0.1311	0.4326	0.3016	216	0.0627	0.3703	0.3076
Notharchus hyperrhynchus	medium	11400000	uncommon	expected on both banks and recorded on one bank	1	4	170	0.1242	0.3963	0.2721	152	0.1779	0.3886	0.2107
Saltator coerulescens	medium	11400000	uncommon	expected on both banks and recorded on one bank	3	5	170	0.1242	0.3963	0.2721	152	0.1779	0.3886	0.2107
Chaetura spinicaudus	medium	3130000	uncommon	expected on both banks and recorded on both banks	0	1	172	0.1237	0.3584	0.2347	227	-0.0059	0.2514	0.2573
Willisornis vidua	high	738000	common	expected on both banks and recorded on both banks	10	26	173	0.1205	0.4353	0.3147	245	-0.0444	0.3278	0.3722
Todirostrum maculatum	low	6600000	uncommon	expected on both banks and recorded on one bank	5	1	174	0.12	0.4268	0.3068	217	0.0583	0.368	0.3097
Odontophorus gujanensis	high	9820000	uncommon	expected on both banks and recorded on both banks	4	3	175	0.1168	0.3721	0.2553	181	0.1337	0.3419	0.2082
Malacoptila rufa	medium	3660000	uncommon	expected on both banks and recorded on both banks	4	5	176	0.1153	0.3542	0.2389	228	-0.0093	0.2497	0.2589
Xiphorhynchus spixii	high	1110000	common	expected on both banks and recorded on both banks	6	20	177	0.1147	0.4321	0.3174	247	-0.0467	0.3265	0.3733
Dendrocolaptes medius	medium	8970000	uncommon	expected on both banks and recorded on both banks	1	7	178	0.1132	0.4074	0.2942	203	0.112	0.3754	0.2634
Formicarius analis	high	10100000	uncommon	expected on both banks and recorded on both banks	7	11	179	0.1116	0.3695	0.2579	183	0.1316	0.3408	0.2093
Pteroglossus inscriptus	medium	3920000	uncommon	expected on both banks and recorded on both banks	5	5	180	0.11	0.3516	0.2416	229	-0.0114	0.2486	0.26
Podager nacunda	does not normally occur in forest	14900000	absent	expected on both banks and not recorded	1	0	181	0.1095	0.5132	0.4037	124	0.2192	0.5615	0.3423
Micrastur mirandollei	high	10200000	uncommon	expected on both banks and recorded on both banks	0	1	182	0.1074	0.3663	0.2589	186	0.1299	0.3396	0.2097
Ara macao	high	10200000	uncommon	expected on both banks and recorded on both banks	1	8	182	0.1074	0.3663	0.2589	186	0.1299	0.3396	0.2097
Habia rubica	high	17600000	uncommon	expected on one bank and recorded on one bank	1	1	184	0.1042	0.4195	0.3153	108	0.2512	0.4655	0.2143
Cymbilaimus lineatus	medium	9350000	uncommon	expected on one bank and recorded on one bank	5	4	185	0.1032	0.4021	0.2989	206	0.108	0.3733	0.2653
Celeus flavus	high	10300000	uncommon	expected on both banks and recorded on both banks	1	7	186	0.1021	0.3642	0.2621	190	0.1278	0.3387	0.2109
Cacicus haemorrhous	medium	12500000	uncommon	expected on both banks and recorded on one bank	0	2	187	0.1016	0.3847	0.2832	157	0.1688	0.384	0.2152
Schiffornis turdina	high	10400000	uncommon	expected on both banks and recorded on both banks	6	13	188	0.0984	0.3626	0.2642	193	0.1263	0.3381	0.2118
Vireo chivi	high	52900000	uncommon	expected on both banks and recorded on one bank	4	4	189	0.0974	0.4005	0.3032	95	0.3099	0.4756	0.1657
Empidonomus varius	medium	12900000	uncommon	expected on both banks and recorded on one bank	3	3	190	0.0942	0.3811	0.2868	158	0.1659	0.3825	0.2166
Certhiasomus stictolaemus	medium	5050000	uncommon	expected on both banks and recorded on both banks	1	2	191	0.0921	0.3426	0.2505	232	-0.0185	0.2451	0.2636
Mionectes macconnelli	medium	5170000	uncommon	expected on both banks and recorded on both banks	6	8	192	0.0889	0.3411	0.2521	234	-0.0198	0.2444	0.2642
Zimmerius acer	high	2730000	common	expected on both banks and recorded on both banks	3	23	193	0.0879	0.4189	0.3311	251	-0.0579	0.3211	0.3789
Sporophila lineola	does not normally occur in forest	5570000	uncommon	expected on both banks and recorded on one bank	2	1	194	0.0879	0.4158	0.3279	230	-0.0126	0.3383	0.3509
Hylophilus semicinereus	medium	5270000	uncommon	expected on both banks and recorded on both banks	2	8	195	0.0858	0.3395	0.2537	235	-0.0211	0.2438	0.2648
Pachyramphus marginatus	high	11000000	uncommon	expected on both banks and recorded on both banks	1	14	196	0.0826	0.3547	0.2721	197	0.12	0.3349	0.2149
Phaethornis superciliosus	high	3030000	uncommon	expected on both banks and recorded on both banks	8	12	197	0.0816	0.4158	0.3342	254	-0.0604	0.3198	0.3802
Tyrannus albogularis	low	5770000	uncommon	expected on one bank and recorded on one bank	0	1	198	0.0795	0.4232	0.3437	233	-0.0194	0.3488	0.3682
Spizaetus ornatus	high	20200000	uncommon	expected on both banks and recorded on both banks	0	2	199	0.0784	0.4074	0.3289	111	0.2408	0.4606	0.2198
Cercomacroides laeta	medium	1720000	common	expected on both banks and recorded on both banks	4	15	200	0.0774	0.4505	0.3732	267	-0.0819	0.3533	0.4352
Rhytipterna simplex	high	11300000	uncommon	expected on both banks and recorded on both banks	2	13	201	0.0758	0.3511	0.2753	199	0.1173	0.3335	0.2162
Dixiphia pipra	high	11300000	uncommon	expected on both banks and recorded on both banks	6	6	201	0.0758	0.3511	0.2753	199	0.1173	0.3335	0.2162
Galbula cyanicollis	high	3350000	common	expected on both banks and recorded on both banks	7	16	203	0.0753	0.4126	0.3374	258	-0.0629	0.3185	0.3815
Todirostrum chrysocrotaphum	medium	5860000	uncommon	expected on both banks and recorded on both banks	2	7	204	0.0721	0.3326	0.2605	237	-0.0265	0.2411	0.2676
Accipiter superciliosus	medium	13800000	uncommon	expected on both banks and recorded on one bank	0	2	205	0.0695	0.3689	0.2995	161	0.156	0.3777	0.2217
Turdus leucomelas	medium	13800000	uncommon	expected on both banks and recorded on one bank	0	0	205	0.0695	0.3689	0.2995	161	0.156	0.3777	0.2217
Ixobrychus exilis	low	27700000	absent	expected on both banks and not recorded	1	0	207	0.0668	0.4874	0.4205	105	0.2606	0.5766	0.316
Bucco capensis	medium	6080000	uncommon	expected on both banks and recorded on both banks	0	4	208	0.0637	0.3284	0.2647	239	-0.0299	0.2394	0.2693
Eurypyga helias	high	11900000	uncommon	expected on both banks and recorded on both banks	3	33	209	0.0632	0.3447	0.2816	202	0.1122	0.3309	0.2187
Formicarius colma	high	12000000	uncommon	expected on both banks and recorded on both banks	6	4	210	0.0605	0.3442	0.2837	204	0.1112	0.3307	0.2196
Chloroceryle aenea	medium	14200000	uncommon	expected on both banks and recorded on one bank	0	9	211	0.06	0.3642	0.3042	166	0.1522	0.3758	0.2236
Agamia agami	high	12200000	uncommon	expected on both banks and recorded on both banks	0	3	212	0.0563	0.3416	0.2853	205	0.1095	0.3297	0.2202
Dendrexetastes rufigula	medium	6340000	uncommon	expected on both banks and recorded on both banks	0	5	213	0.0542	0.3237	0.2695	240	-0.0337	0.2375	0.2712
Amaurolimnas concolor	medium	14700000	uncommon	expected on both banks and recorded on one bank	1	1	214	0.0521	0.3605	0.3084	167	0.1491	0.3743	0.2253
Lathrotriccus euleri	medium	15000000	uncommon	expected on both banks and recorded on one bank	1	1	215	0.0474	0.3574	0.31	169	0.1472	0.3731	0.2259
Orthopsittaca manilatus	low	8860000	uncommon	expected on both banks and recorded on one bank	0	1	216	0.0468	0.3905	0.3437	220	0.0291	0.3535	0.3244
Pseudastur albicollis	high	12800000	uncommon	expected on both banks and recorded on both banks	1	4	217	0.0447	0.3363	0.2916	207	0.1048	0.3276	0.2227
Crypturellus soui	medium	15200000	uncommon	expected on both banks and recorded on one bank	2	3	218	0.0437	0.3563	0.3126	171	0.1457	0.3726	0.2269
Penelope superciliaris	medium	6550000	uncommon	expected on both banks and recorded on both banks	2	1	218	0.0437	0.3184	0.2747	241	-0.0379	0.2354	0.2733
Galbula dea	medium	6560000	uncommon	expected on both banks and recorded on both banks	1	18	220	0.0421	0.3174	0.2753	242	-0.0385	0.2349	0.2735
Dacnis cayana	medium	15700000	uncommon	expected on both banks and recorded on one bank	3	1	221	0.0358	0.3521	0.3163	173	0.1425	0.3709	0.2284
Galbula ruficauda	medium	15700000	uncommon	expected on both banks and recorded on both banks	7	1	221	0.0358	0.3521	0.3163	173	0.1425	0.3709	0.2284
Notharchus tectus	medium	6720000	uncommon	expected on both banks and recorded on both banks	2	19	223	0.0342	0.3137	0.2795	244	-0.0417	0.2335	0.2752
Polioptila plumbea	medium	15800000	uncommon	expected on both banks and recorded on one bank	6	1	224	0.0337	0.3511	0.3174	175	0.1417	0.3705	0.2288
Lophotriccus galeatus	medium	4780000	common	expected on both banks and recorded on both banks	2	29	225	0.0321	0.4279	0.3958	280	-0.1004	0.344	0.4444
Lurocalis semitorquatus	medium	16000000	uncommon	expected on both banks and recorded on one bank	0	2	226	0.03	0.3495	0.3195	177	0.1402	0.3699	0.2297
Myrmotherula longipennis	high	5930000	common	expected on both banks and recorded on both banks	4	21	227	0.0274	0.3884	0.3611	268	-0.0821	0.3088	0.3909
Tityra semifasciata	medium	16200000	uncommon	expected on both banks and recorded on one bank	0	3	228	0.0268	0.3479	0.3211	179	0.1394	0.3695	0.2301
Pteroglossus aracari	medium	6980000	uncommon	expected on both banks and recorded on both banks	2	26	229	0.0237	0.3079	0.2842	246	-0.0459	0.2312	0.2771
Myiothlypis flaveola	medium	10700000	uncommon	not expected	0	1	230	0.0168	0.3637	0.3468	332	-0.1632	0.2432	0.4063
Pheugopedius coraya	medium	5500000	common	expected on one bank and recorded on one bank	4	13	231	0.0121	0.4179	0.4058	285	-0.1084	0.34	0.4484
Trogon rufus	high	14200000	uncommon	expected on both banks and recorded on both banks	1	12	232	0.0084	0.3179	0.3095	209	0.0903	0.3202	0.2299
Megascops choliba	medium	17400000	uncommon	expected on both banks and recorded on one bank	0	1	233	0.0074	0.3379	0.3305	184	0.1316	0.3655	0.2339
Spizaetus tyrannus	medium	17500000	uncommon	expected on both banks and recorded on one bank	0	1	234	0.0058	0.3374	0.3316	185	0.1309	0.3653	0.2343
Piculus laemostictus	medium	13300000	uncommon	expected on one bank and recorded on one bank	0	1	235	0.0037	0.3516	0.3479	211	0.0682	0.3531	0.2848
Harpagus bidentatus	medium	17600000	uncommon	expected on both banks and recorded on one bank	1	2	236	0.0032	0.3353	0.3321	188	0.1299	0.3644	0.2345
Hydropsalis parvula	medium	13500000	uncommon	expected on one bank and recorded on one bank	2	1	237	-0.0005	0.35	0.3505	213	0.0665	0.3524	0.2859
Tityra inquisitor	medium	18100000	uncommon	expected on both banks and recorded on one bank	1	2	238	-0.0016	0.3332	0.3347	189	0.128	0.3636	0.2356
Pulsatrix perspicillata	medium	18200000	uncommon	expected on both banks and recorded on one bank	1	1	239	-0.0042	0.3321	0.3363	191	0.1269	0.3632	0.2362
Pachyramphus polychopterus	medium	18200000	uncommon	expected on both banks and recorded on one bank	2	3	239	-0.0042	0.3321	0.3363	191	0.1269	0.3632	0.2362
Cyanoloxia rothschildii	medium	7600000	uncommon	expected on both banks and recorded on both banks	8	12	241	-0.0047	0.2937	0.2984	250	-0.0573	0.2255	0.2827
Sittasomus griseicapillus	medium	13700000	uncommon	expected on one bank and recorded on one bank	1	10	242	-0.0053	0.3479	0.3532	215	0.0646	0.3516	0.2869
Sporophila minuta	does not normally occur in forest	7820000	uncommon	expected on both banks and recorded on one bank	1	0	243	-0.0058	0.3689	0.3747	249	-0.0501	0.3196	0.3697
Taraba major	medium	18300000	uncommon	expected on both banks and recorded on one bank	5	4	244	-0.0063	0.3311	0.3374	194	0.1261	0.3627	0.2366
Synallaxis rutilans	high	6770000	common	expected on both banks and recorded on both banks	7	18	245	-0.0105	0.3695	0.38	276	-0.0973	0.3013	0.3985
Claravis pretiosa	medium	18900000	uncommon	expected on both banks and recorded on one bank	0	2	246	-0.0121	0.3284	0.3405	195	0.1238	0.3617	0.2379
Eupsittula aurea	medium	8000000	uncommon	expected on both banks and recorded on both banks	0	1	247	-0.0163	0.2884	0.3047	255	-0.0619	0.2234	0.2853
Amazona ochrocephala	medium	8010000	uncommon	expected on both banks and recorded on both banks	1	14	248	-0.0174	0.2879	0.3053	256	-0.0623	0.2232	0.2855
Daptrius ater	medium	8090000	uncommon	expected on both banks and recorded on both banks	2	37	249	-0.0184	0.2874	0.3058	257	-0.0627	0.2229	0.2857
Hydropsalis climacocerca	does not normally occur in forest	6490000	uncommon	expected on one bank and recorded on one bank	2	2	250	-0.02	0.3779	0.3979	296	-0.1173	0.3055	0.4227
Micrastur semitorquatus	medium	20500000	uncommon	expected on both banks and recorded on one bank	0	3	251	-0.0253	0.3216	0.3468	198	0.1185	0.3589	0.2404
Falco deiroleucus	high	16300000	uncommon	expected on both banks and recorded on both banks	0	30	252	-0.0258	0.3011	0.3268	210	0.0771	0.3137	0.2366
Trogon melanurus	medium	8520000	uncommon	expected on both banks and recorded on both banks	0	3	253	-0.0274	0.2826	0.31	259	-0.0663	0.2211	0.2874
Pluvialis dominica	does not normally occur in forest	7040000	uncommon	expected on both banks and recorded on one bank	0	0	254	-0.0279	0.3579	0.3858	253	-0.0589	0.3152	0.3741
Tyrannulus elatus	medium	8700000	uncommon	expected on both banks and recorded on both banks	4	15	255	-0.03	0.2816	0.3116	260	-0.0674	0.2206	0.288
Onychorhynchus coronatus	high	7160000	common	expected on both banks and recorded on both banks	5	16	255	-0.03	0.36	0.39	282	-0.1051	0.2975	0.4025
Coccyzus melacoryphus	medium	21700000	uncommon	expected on both banks and recorded on one bank	2	1	257	-0.0342	0.3168	0.3511	201	0.1149	0.3571	0.2421
Monasa nigrifrons	medium	8880000	uncommon	expected on both banks and recorded on both banks	5	6	258	-0.0363	0.2784	0.3147	261	-0.0699	0.2194	0.2893
Coryphospingus cucullatus	low	12200000	uncommon	expected on both banks and recorded on one bank	2	1	259	-0.0395	0.3468	0.3863	226	-0.0055	0.336	0.3415
Cercomacra cinerascens	high	7420000	common	expected on both banks and recorded on both banks	2	34	260	-0.0405	0.3547	0.3953	286	-0.1093	0.2954	0.4046
Saltator grossus	medium	9340000	uncommon	expected on both banks and recorded on both banks	2	10	261	-0.0479	0.2726	0.3205	262	-0.0745	0.2171	0.2916
Harpia harpyja	high	17600000	uncommon	expected on both banks and recorded on both banks	0	1	262	-0.0484	0.2889	0.3374	212	0.068	0.3088	0.2408
Euphonia violacea	medium	9350000	uncommon	expected on both banks and recorded on both banks	6	6	263	-0.0495	0.2716	0.3211	263	-0.0752	0.2166	0.2918
Pipra fasciicauda	high	7620000	common	expected on both banks and recorded on both banks	8	24	264	-0.0511	0.3495	0.4005	292	-0.1135	0.2933	0.4067
Poecilotriccus sylvia	medium	7120000	common	expected on both banks and recorded on both banks	1	13	265	-0.0537	0.3847	0.4384	311	-0.1347	0.3267	0.4615
Myiodynastes maculatus	medium	9770000	uncommon	expected on both banks and recorded on both banks	2	28	266	-0.0553	0.2689	0.3242	264	-0.0775	0.2156	0.2931
Tringa solitaria	medium	9810000	uncommon	expected on both banks and recorded on both banks	0	11	267	-0.0595	0.2668	0.3263	265	-0.0792	0.2147	0.2939
Conirostrum speciosum	low	13100000	uncommon	expected on both banks and recorded on one bank	1	9	268	-0.0595	0.3368	0.3963	231	-0.0135	0.332	0.3455
Thamnophilus aethiops	high	8180000	common	expected on both banks and recorded on both banks	3	23	269	-0.0626	0.3437	0.4063	297	-0.1181	0.2909	0.4091
Icterus cayanensis	low	5290000	uncommon	expected on both banks and recorded on both banks	6	7	269	-0.0626	0.2979	0.3605	339	-0.1983	0.1943	0.3926
Chaetura brachyura	medium	9940000	uncommon	expected on both banks and recorded on both banks	0	10	271	-0.0637	0.2647	0.3284	266	-0.0808	0.2139	0.2947
Pyriglena leuconota	high	8450000	common	expected on both banks and recorded on both banks	10	30	272	-0.0668	0.3416	0.4084	298	-0.1198	0.2901	0.4099
Ara severus	high	8470000	common	expected on both banks and recorded on both banks	0	41	273	-0.0679	0.3411	0.4089	299	-0.1202	0.2899	0.4101
Coccycua minuta	medium	10200000	uncommon	expected on both banks and recorded on both banks	2	6	274	-0.0705	0.26	0.3305	269	-0.0836	0.212	0.2956
Ornithion inerme	medium	10200000	uncommon	expected on both banks and recorded on both banks	3	16	274	-0.0705	0.26	0.3305	269	-0.0836	0.212	0.2956
Tangara nigrocincta	medium	6010000	uncommon	not expected	0	0	276	-0.0758	0.3174	0.3932	340	-0.2006	0.2244	0.4251
Monasa morphoeus	medium	10300000	uncommon	expected on both banks and recorded on both banks	2	3	277	-0.0758	0.2579	0.3337	272	-0.0857	0.2112	0.2968
Piculus flavigula	medium	10300000	uncommon	expected on both banks and recorded on both banks	3	7	277	-0.0758	0.2579	0.3337	272	-0.0857	0.2112	0.2968
Diopsittaca nobilis	low	5930000	uncommon	expected on both banks and recorded on both banks	0	28	279	-0.0768	0.2905	0.3674	341	-0.204	0.1914	0.3954
Sporophila angolensis	low	13900000	uncommon	expected on both banks and recorded on one bank	0	7	280	-0.0805	0.3263	0.4068	236	-0.0219	0.3278	0.3497
Lepidocolaptes layardi	medium	2390000	common	expected on both banks and recorded on both banks	1	36	281	-0.0826	0.3163	0.3989	351	-0.2684	0.1949	0.4634
Sarcoramphus papa	high	21600000	uncommon	expected on both banks and recorded on both banks	0	5	282	-0.0832	0.2721	0.3553	218	0.0541	0.3021	0.248
Falco rufigularis	high	21700000	uncommon	expected on both banks and recorded on both banks	0	23	283	-0.0858	0.2705	0.3563	219	0.0531	0.3015	0.2484
Campylorhynchus turdinus	high	9110000	common	expected on both banks and recorded on both banks	3	39	284	-0.0868	0.3316	0.4184	302	-0.1278	0.2861	0.4139
Casiornis fuscus	does not normally occur in forest	2700000	uncommon	expected on both banks and recorded on both banks	1	2	285	-0.0879	0.29	0.3779	349	-0.2665	0.1659	0.4324
Thamnomanes caesius	high	9240000	common	expected on both banks and recorded on both banks	10	29	286	-0.0889	0.3305	0.4195	303	-0.1286	0.2857	0.4143
Veniliornis affinis	high	9290000	common	expected on both banks and recorded on both banks	5	31	287	-0.09	0.33	0.42	304	-0.1291	0.2855	0.4145
Colaptes melanochloros	medium	6390000	uncommon	not expected	0	14	288	-0.0916	0.3095	0.4011	342	-0.2069	0.2213	0.4282
Cissopis leverianus	medium	11000000	uncommon	expected on both banks and recorded on both banks	0	5	289	-0.0953	0.2484	0.3437	274	-0.0935	0.2074	0.3008
Ramphastos tucanus	medium	3240000	common	expected on both banks and recorded on both banks	4	61	290	-0.0984	0.3084	0.4068	353	-0.2747	0.1918	0.4665
Cacicus cela	medium	11200000	uncommon	expected on both banks and recorded on both banks	1	10	291	-0.0984	0.2468	0.3453	275	-0.0947	0.2067	0.3015
Phaeomyias murina	low	15000000	uncommon	expected on both banks and recorded on one bank	3	3	292	-0.1	0.3163	0.4163	238	-0.0297	0.3238	0.3535
Pheugopedius genibarbis	medium	8790000	common	expected on both banks and recorded on both banks	4	21	293	-0.1011	0.3611	0.4621	325	-0.1537	0.3173	0.4709
Chordeiles rupestris	does not normally occur in forest	3620000	uncommon	expected on both banks and recorded on both banks	2	4	294	-0.1037	0.2821	0.3858	352	-0.2728	0.1627	0.4356
Arremon taciturnus	high	9910000	common	expected on both banks and recorded on both banks	10	30	295	-0.1058	0.3221	0.4279	312	-0.1354	0.2823	0.4177
Pachyramphus castaneus	medium	11500000	uncommon	expected on both banks and recorded on both banks	1	13	296	-0.1079	0.2421	0.35	277	-0.0985	0.2048	0.3034
Brotogeris chrysoptera	medium	3840000	common	expected on both banks and recorded on both banks	2	16	297	-0.1089	0.3032	0.4121	356	-0.2789	0.1897	0.4686
Herpsilochmus rufimarginatus	medium	11800000	common	expected on both banks and recorded on both banks	1	12	298	-0.1111	0.2405	0.3516	278	-0.0998	0.2042	0.304
Florisuga mellivora	medium	11800000	uncommon	expected on both banks and recorded on both banks	2	1	298	-0.1111	0.2405	0.3516	278	-0.0998	0.2042	0.304
Trogon ramonianus	medium	12100000	uncommon	expected on both banks and recorded on both banks	2	1	300	-0.1189	0.2368	0.3558	281	-0.1029	0.2027	0.3057
Myrmotherula axillaris	high	10400000	common	expected on both banks and recorded on both banks	12	57	301	-0.1226	0.3132	0.4358	316	-0.1421	0.2787	0.4208
Tyrannus savana	low	16500000	uncommon	expected on both banks and recorded on one bank	0	1	302	-0.1263	0.3032	0.4295	243	-0.0398	0.3187	0.3585
Thalurania furcata	medium	12500000	uncommon	expected on both banks and recorded on both banks	7	8	303	-0.1279	0.2321	0.36	283	-0.1065	0.2008	0.3074
Lipaugus vociferans	high	10600000	common	expected on both banks and recorded on both banks	8	52	303	-0.1279	0.3105	0.4384	317	-0.1442	0.2777	0.4219
Amazilia fimbriata	medium	12700000	uncommon	expected on both banks and recorded on both banks	2	1	305	-0.1311	0.2305	0.3616	284	-0.1078	0.2002	0.308
Sporophila castaneiventris	does not normally occur in forest	5440000	uncommon	expected on both banks and recorded on both banks	3	9	306	-0.1363	0.2658	0.4021	358	-0.2859	0.1562	0.4421
Amazonetta brasiliensis	medium	13000000	uncommon	expected on both banks and recorded on both banks	0	10	307	-0.1384	0.2268	0.3653	287	-0.1107	0.1987	0.3095
Chloroceryle inda	medium	13000000	uncommon	expected on both banks and recorded on both banks	2	9	307	-0.1384	0.2268	0.3653	287	-0.1107	0.1987	0.3095
Cathartes melambrotus	low	7330000	uncommon	expected on both banks and recorded on both banks	0	47	309	-0.1411	0.2584	0.3995	344	-0.2297	0.1785	0.4082
Isleria hauxwelli	medium	5640000	common	expected on both banks and recorded on both banks	2	37	310	-0.1442	0.2853	0.4295	360	-0.2931	0.1825	0.4756
Nyctibius grandis	medium	13200000	uncommon	expected on both banks and recorded on both banks	0	1	311	-0.1447	0.2237	0.3684	291	-0.1133	0.1975	0.3107
Spizaetus melanoleucus	low	18100000	uncommon	expected on both banks and recorded on one bank	0	0	312	-0.1489	0.2921	0.4411	248	-0.0488	0.3143	0.3632
Campephilus melanoleucos	medium	13300000	uncommon	expected on both banks and recorded on both banks	1	29	312	-0.1489	0.2211	0.37	293	-0.1149	0.1964	0.3114
Ictinia plumbea	medium	13300000	uncommon	expected on both banks and recorded on both banks	1	3	312	-0.1489	0.2211	0.37	293	-0.1149	0.1964	0.3114
Ramphastos vitellinus	medium	5990000	common	expected on both banks and recorded on both banks	1	32	315	-0.1521	0.2816	0.4337	362	-0.2962	0.1811	0.4773
Mesembrinibis cayennensis	medium	13500000	uncommon	expected on both banks and recorded on both banks	0	29	316	-0.1532	0.2195	0.3726	295	-0.1166	0.1958	0.3124
Tringa flavipes	does not normally occur in forest	6070000	uncommon	expected on both banks and recorded on both banks	0	14	317	-0.1553	0.2563	0.4116	361	-0.2935	0.1524	0.4459
Arundinicola leucocephala	does not normally occur in forest	14100000	uncommon	expected on both banks and recorded on one bank	0	0	318	-0.1579	0.2926	0.4505	289	-0.1109	0.2891	0.4
Geothlypis aequinoctialis	does not normally occur in forest	14100000	uncommon	expected on both banks and recorded on one bank	1	1	318	-0.1579	0.2926	0.4505	289	-0.1109	0.2891	0.4
Myiopagis gaimardii	high	12100000	common	expected on both banks and recorded on both banks	5	40	320	-0.1621	0.2937	0.4558	327	-0.1579	0.2709	0.4288
Psarocolius decumanus	medium	13900000	uncommon	expected on both banks and recorded on both banks	4	11	321	-0.1626	0.2147	0.3774	300	-0.1204	0.1939	0.3143
Leptotila rufaxilla	medium	14300000	uncommon	expected on both banks and recorded on both banks	8	30	322	-0.1716	0.2105	0.3821	301	-0.124	0.1922	0.3162
Megarynchus pitangua	low	20500000	uncommon	expected on both banks and recorded on one bank	3	2	323	-0.1726	0.2805	0.4532	252	-0.0583	0.3097	0.368
Turdus nudigenis	low	4300000	uncommon	not expected	0	0	324	-0.1842	0.2958	0.48	390	-0.3621	0.1827	0.5448
Turdus albicollis	medium	15100000	uncommon	expected on both banks and recorded on both banks	4	6	325	-0.1847	0.2042	0.3889	305	-0.1293	0.1897	0.3189
Saltator maximus	medium	15400000	uncommon	expected on both banks and recorded on both banks	4	8	326	-0.1879	0.2026	0.3905	306	-0.1305	0.1891	0.3196
Tringa melanoleuca	low	9080000	uncommon	expected on both banks and recorded on both banks	0	5	327	-0.19	0.2342	0.4242	345	-0.2493	0.1688	0.4181
Buteo nitidus	medium	15500000	uncommon	expected on both banks and recorded on both banks	0	54	328	-0.1905	0.2005	0.3911	308	-0.1316	0.1882	0.3198
Crotophaga major	medium	15500000	uncommon	expected on both banks and recorded on both banks	3	24	328	-0.1905	0.2005	0.3911	308	-0.1316	0.1882	0.3198
Myrmotherula menetriesii	medium	6980000	common	expected on both banks and recorded on both banks	9	27	330	-0.1974	0.2584	0.4558	368	-0.3143	0.1718	0.4861
Panyptila cayennensis	medium	15900000	uncommon	expected on both banks and recorded on both banks	0	1	331	-0.1979	0.1974	0.3953	310	-0.1345	0.1869	0.3215
Piaya cayana	medium	20200000	uncommon	expected on both banks and recorded on both banks	3	19	332	-0.2011	0.1958	0.3968	225	0.0021	0.2554	0.2533
Molothrus oryzivorus	medium	16400000	uncommon	expected on both banks and recorded on both banks	0	3	333	-0.2053	0.1937	0.3989	313	-0.1371	0.1857	0.3227
Synallaxis albescens	does not normally occur in forest	17000000	uncommon	expected on both banks and recorded on one bank	0	4	334	-0.2079	0.2679	0.4758	307	-0.1305	0.2794	0.4099
Xenops minutus	high	14000000	common	expected on both banks and recorded on both banks	8	23	335	-0.2084	0.2705	0.4789	337	-0.1764	0.2617	0.4381
Mionectes oleagineus	medium	16600000	uncommon	expected on both banks and recorded on both banks	5	16	336	-0.2111	0.1911	0.4021	314	-0.1394	0.1846	0.324
Patagioenas speciosa	medium	16900000	uncommon	expected on both banks and recorded on both banks	2	4	337	-0.2158	0.1884	0.4042	315	-0.1413	0.1836	0.3248
Amazona aestiva	low	5800000	uncommon	not expected	0	4	338	-0.2179	0.2789	0.4968	398	-0.3754	0.1762	0.5516
Myiornis ecaudatus	medium	7600000	common	expected on both banks and recorded on both banks	0	22	339	-0.2258	0.2442	0.47	371	-0.3257	0.1661	0.4918
Nyctibius griseus	medium	17600000	uncommon	expected on both banks and recorded on both banks	1	1	340	-0.2263	0.1826	0.4089	318	-0.1455	0.1813	0.3267
Tachornis squamata	low	10500000	uncommon	expected on both banks and recorded on both banks	0	1	341	-0.2295	0.2142	0.4437	347	-0.2651	0.1608	0.4259
Ara chloropterus	low	10500000	uncommon	expected on both banks and recorded on both banks	1	45	341	-0.2295	0.2142	0.4437	347	-0.2651	0.1608	0.4259
Xiphorhynchus guttatoides	medium	7680000	common	expected on both banks and recorded on both banks	8	44	343	-0.2311	0.2421	0.4732	372	-0.3278	0.1653	0.4931
Melanerpes candidus	medium	10700000	uncommon	not expected	0	3	344	-0.2321	0.2384	0.4705	346	-0.2632	0.1928	0.456
Campephilus rubricollis	high	7810000	common	expected on both banks and recorded on both banks	1	32	345	-0.2347	0.24	0.4747	374	-0.3293	0.1644	0.4937
Ibycter americanus	low	10700000	uncommon	expected on both banks and recorded on both banks	2	9	346	-0.2358	0.2105	0.4463	350	-0.2676	0.1594	0.4269
Cochlearius cochlearius	medium	18600000	uncommon	expected on both banks and recorded on both banks	0	1	347	-0.2379	0.1774	0.4153	320	-0.1501	0.1792	0.3293
Legatus leucophaius	medium	18600000	uncommon	expected on both banks and recorded on both banks	2	9	347	-0.2379	0.1774	0.4153	320	-0.1501	0.1792	0.3293
Patagioenas cayennensis	medium	18700000	uncommon	expected on both banks and recorded on both banks	4	11	349	-0.2395	0.1768	0.4163	322	-0.1507	0.1789	0.3297
Falco peregrinus	low	387000000	uncommon	expected on both banks and recorded on one bank	1	1	350	-0.2405	0.2468	0.4874	271	-0.0855	0.2962	0.3817
Myiozetetes similis	low	19600000	uncommon	expected on both banks and recorded on both banks	0	5	351	-0.2437	0.2611	0.5047	319	-0.1482	0.2842	0.4324
Micrastur ruficollis	medium	19300000	uncommon	expected on both banks and recorded on both banks	1	15	352	-0.2458	0.1737	0.4195	324	-0.1533	0.1777	0.3309
Ramphocaenus melanurus	high	16400000	common	expected on both banks and recorded on both banks	7	21	353	-0.2484	0.2505	0.4989	338	-0.192	0.2539	0.4459
Strix huhula	medium	11700000	uncommon	expected on both banks and recorded on both banks	0	1	354	-0.2489	0.1716	0.4205	326	-0.1545	0.1768	0.3314
Formicivora grisea	medium	8830000	common	expected on both banks and recorded on both banks	10	32	355	-0.2553	0.23	0.4853	379	-0.3375	0.1604	0.4979
Myiozetetes cayanensis	low	11500000	uncommon	expected on both banks and recorded on both banks	3	17	356	-0.2553	0.2011	0.4563	354	-0.2754	0.1556	0.4309
Aramides cajaneus	medium	21400000	uncommon	expected on both banks and recorded on both banks	2	11	357	-0.2595	0.1668	0.4263	328	-0.1587	0.1749	0.3337
Chordeiles acutipennis	does not normally occur in forest	22400000	uncommon	expected on both banks and recorded on one bank	4	1	358	-0.2616	0.2405	0.5021	323	-0.152	0.2684	0.4204
Chelidoptera tenebrosa	low	11900000	uncommon	expected on both banks and recorded on both banks	11	8	359	-0.2621	0.1974	0.4595	355	-0.2781	0.1541	0.4322
Urubitinga urubitinga	medium	22100000	uncommon	expected on both banks and recorded on both banks	1	31	360	-0.2663	0.1632	0.4295	330	-0.1615	0.1735	0.3349
Nyctidromus albicollis	medium	22100000	uncommon	expected on both banks and recorded on both banks	3	13	360	-0.2663	0.1632	0.4295	330	-0.1615	0.1735	0.3349
Geotrygon montana	medium	22600000	uncommon	expected on both banks and recorded on both banks	3	12	362	-0.2742	0.1595	0.4337	334	-0.1646	0.172	0.3366
Dysithamnus mentalis	medium	16700000	common	expected on both banks and recorded on both banks	3	19	363	-0.2816	0.2705	0.5521	343	-0.2255	0.2813	0.5067
Columbina passerina	does not normally occur in forest	27300000	uncommon	expected on both banks and recorded on one bank	3	3	364	-0.2816	0.2311	0.5126	329	-0.16	0.2646	0.4246
Tolmomyias poliocephalus	medium	10000000	common	expected on both banks and recorded on both banks	4	31	365	-0.2858	0.2147	0.5005	384	-0.3497	0.1543	0.504
Pionus menstruus	medium	10100000	common	expected on both banks and recorded on both banks	3	78	366	-0.2874	0.2137	0.5011	385	-0.3503	0.1539	0.5042
Buteo brachyurus	medium	25400000	uncommon	expected on both banks and recorded on both banks	0	7	367	-0.2879	0.1526	0.4405	335	-0.1701	0.1693	0.3394
Geotrygon violacea	medium	13200000	uncommon	not expected	0	1	368	-0.2884	0.2105	0.4989	357	-0.2857	0.1817	0.4674
Leptotila verreauxi	medium	26000000	uncommon	expected on both banks and recorded on both banks	1	18	369	-0.2889	0.1521	0.4411	336	-0.1705	0.1691	0.3396
Porphyrio martinicus	does not normally occur in forest	31100000	uncommon	expected on both banks and recorded on one bank	1	2	370	-0.2911	0.2263	0.5174	333	-0.1638	0.2627	0.4265
Colonia colonus	medium	13700000	uncommon	not expected	0	0	371	-0.3016	0.2042	0.5058	359	-0.2909	0.1792	0.4701
Guira guira	does not normally occur in forest	10600000	uncommon	expected on both banks and recorded on both banks	1	1	372	-0.3047	0.1811	0.4858	387	-0.3533	0.1223	0.4756
Gnorimopsar chopi	low	8400000	uncommon	not expected	0	2	373	-0.3137	0.2311	0.5447	411	-0.4137	0.1571	0.5707
Phaethornis ruber	medium	11300000	common	expected on both banks and recorded on both banks	5	40	374	-0.3232	0.1953	0.5184	391	-0.3646	0.1465	0.5112
Momotus momota	medium	11300000	common	expected on both banks and recorded on both banks	8	27	374	-0.3232	0.1953	0.5184	391	-0.3646	0.1465	0.5112
Anthracothorax nigricollis	low	14900000	uncommon	expected on both banks and recorded on both banks	3	3	376	-0.3263	0.1658	0.4921	363	-0.3038	0.1415	0.4453
Elanoides forficatus	low	15000000	uncommon	expected on both banks and recorded on both banks	0	7	377	-0.3295	0.1637	0.4932	364	-0.3051	0.1406	0.4457
Trogon viridis	medium	11800000	common	expected on both banks and recorded on both banks	4	40	378	-0.3321	0.1911	0.5232	394	-0.3682	0.1448	0.5131
Tangara palmarum	low	15300000	uncommon	expected on both banks and recorded on both banks	3	35	379	-0.3342	0.1621	0.4963	365	-0.3069	0.14	0.4469
Laterallus viridis	does not normally occur in forest	11900000	uncommon	expected on both banks and recorded on both banks	2	9	380	-0.3347	0.1658	0.5005	393	-0.3653	0.1162	0.4815
Paroaria gularis	low	6770000	common	expected on both banks and recorded on both banks	4	49	381	-0.3358	0.2221	0.5579	431	-0.4876	0.1244	0.612
Tachyphonus rufus	low	15500000	uncommon	expected on both banks and recorded on both banks	7	5	382	-0.3379	0.1595	0.4974	366	-0.3084	0.1389	0.4474
Amazona amazonica	medium	12200000	common	expected on both banks and recorded on both banks	0	34	383	-0.3426	0.1858	0.5284	396	-0.3724	0.1427	0.5152
Dendrocincla fuliginosa	medium	12300000	common	expected on both banks and recorded on both banks	8	53	384	-0.3447	0.1853	0.53	397	-0.3733	0.1425	0.5158
Pilherodius pileatus	does not normally occur in forest	12400000	uncommon	expected on both banks and recorded on both banks	1	32	385	-0.3453	0.1611	0.5063	395	-0.3695	0.1143	0.4838
Gampsonyx swainsonii	low	16100000	uncommon	expected on both banks and recorded on both banks	0	9	386	-0.3484	0.1547	0.5032	367	-0.3124	0.1373	0.4497
Vanellus cayanus	does not normally occur in forest	13100000	uncommon	expected on both banks and recorded on both banks	5	26	387	-0.3616	0.1526	0.5142	399	-0.376	0.1109	0.4869
Leptopogon amaurocephalus	medium	17100000	uncommon	not expected	0	3	388	-0.3626	0.1737	0.5363	369	-0.3149	0.1672	0.4821
Psittacara leucophthalmus	medium	13200000	common	expected on both banks and recorded on both banks	4	43	389	-0.3658	0.1742	0.54	400	-0.3817	0.1381	0.5198
Lepidocolaptes angustirostris	low	10300000	uncommon	not expected	0	0	390	-0.3668	0.2037	0.5705	425	-0.4349	0.1461	0.5811
Glyphorynchus spirurus	medium	13500000	common	expected on both banks and recorded on both banks	6	37	391	-0.3742	0.17	0.5442	402	-0.3851	0.1364	0.5215
Myiarchus ferox	medium	13600000	common	expected on both banks and recorded on both banks	2	43	392	-0.3768	0.1689	0.5458	404	-0.3861	0.136	0.5221
Thamnophilus doliatus	medium	18300000	uncommon	not expected	0	0	393	-0.3795	0.1653	0.5447	370	-0.3217	0.1638	0.4855
Donacobius atricapilla	does not normally occur in forest	13900000	uncommon	expected on both banks and recorded on both banks	2	20	394	-0.3826	0.1421	0.5247	401	-0.3844	0.1067	0.4912
Sternula superciliaris	does not normally occur in forest	14000000	uncommon	expected on both banks and recorded on both banks	0	9	395	-0.3853	0.1411	0.5263	403	-0.3855	0.1063	0.4918
Heterospizias meridionalis	low	19000000	uncommon	expected on both banks and recorded on both banks	0	3	396	-0.39	0.1342	0.5242	373	-0.3288	0.1291	0.4579
Hemithraupis guira	medium	14300000	common	expected on both banks and recorded on both banks	4	22	397	-0.3926	0.1611	0.5537	406	-0.3924	0.1328	0.5253
Sporophila nigricollis	does not normally occur in forest	14400000	uncommon	expected on both banks and recorded on both banks	2	3	398	-0.3937	0.1368	0.5305	405	-0.3888	0.1046	0.4935
Cathartes burrovianus	low	19600000	uncommon	expected on both banks and recorded on both banks	0	12	399	-0.3963	0.1305	0.5268	375	-0.3314	0.1276	0.4589
Herpetotheres cachinnans	low	20400000	uncommon	expected on both banks and recorded on both banks	0	15	400	-0.4005	0.1289	0.5295	376	-0.3331	0.1269	0.46
Busarellus nigricollis	low	21300000	uncommon	expected on both banks and recorded on both banks	0	42	401	-0.4053	0.1263	0.5316	377	-0.3349	0.1259	0.4608
Buteo albonotatus	medium	22300000	uncommon	not expected	0	2	402	-0.4126	0.1489	0.5616	377	-0.3349	0.1573	0.4922
Coereba flaveola	low	22400000	uncommon	expected on both banks and recorded on both banks	4	22	403	-0.4184	0.1195	0.5379	380	-0.3402	0.1232	0.4634
Chloroceryle amazona	low	23000000	uncommon	expected on both banks and recorded on both banks	2	47	404	-0.4226	0.1179	0.5405	381	-0.3419	0.1225	0.4644
Rupornis magnirostris	low	23900000	uncommon	expected on both banks and recorded on both banks	4	55	405	-0.4258	0.1163	0.5421	383	-0.3432	0.1219	0.4651
Caracara plancus	does not normally occur in forest	16500000	uncommon	expected on both banks and recorded on both banks	0	41	406	-0.4284	0.1189	0.5474	407	-0.4023	0.0977	0.5
Milvago chimachima	does not normally occur in forest	16500000	uncommon	expected on both banks and recorded on both banks	0	1	406	-0.4284	0.1189	0.5474	407	-0.4023	0.0977	0.5
Glaucidium brasilianum	medium	25100000	uncommon	not expected	0	2	408	-0.43	0.14	0.57	381	-0.3419	0.1537	0.4956
Heliornis fulica	does not normally occur in forest	16700000	uncommon	expected on both banks and recorded on both banks	0	3	409	-0.4332	0.1168	0.55	409	-0.4042	0.0968	0.5011
Tolmomyias flaviventris	low	10200000	common	expected on both banks and recorded on both banks	2	43	410	-0.4389	0.1695	0.6084	434	-0.5288	0.1034	0.6322
Progne tapera	does not normally occur in forest	17400000	uncommon	expected on both banks and recorded on both banks	1	0	411	-0.4421	0.1126	0.5547	410	-0.4078	0.0952	0.5029
Ammodramus aurifrons	does not normally occur in forest	7610000	common	expected on both banks and recorded on both banks	3	33	412	-0.4479	0.1711	0.6189	447	-0.5905	0.0787	0.6693
Attila spadiceus	medium	18100000	common	expected on both banks and recorded on both banks	4	31	413	-0.4521	0.1311	0.5832	413	-0.4158	0.1211	0.5368
Ramphastos toco	medium	9600000	uncommon	not expected	1	1	414	-0.4568	0.1268	0.5837	386	-0.3526	0.1484	0.5011
Columbina minuta	does not normally occur in forest	18800000	uncommon	expected on both banks and recorded on both banks	0	2	415	-0.4605	0.1037	0.5642	412	-0.4152	0.0916	0.5067
Sturnella militaris	does not normally occur in forest	8310000	common	expected on both banks and recorded on both banks	0	63	416	-0.4616	0.1642	0.6258	449	-0.596	0.076	0.672
Columbina squammata	does not normally occur in forest	11200000	uncommon	not expected	0	3	417	-0.4621	0.1611	0.6232	435	-0.5312	0.1038	0.6349
Pandion haliaetus	low	228000000	uncommon	expected on both banks and recorded on both banks	0	33	418	-0.4626	0.0979	0.5605	388	-0.3579	0.1145	0.4724
Nycticorax nycticorax	low	233000000	uncommon	expected on both banks and recorded on both banks	0	4	419	-0.4637	0.0974	0.5611	389	-0.3583	0.1143	0.4726
Tolmomyias sulphurescens	medium	19200000	common	expected on both banks and recorded on both banks	2	32	420	-0.4658	0.1247	0.5905	416	-0.4213	0.1185	0.5398
Elaenia flavogaster	does not normally occur in forest	19400000	uncommon	expected on both banks and recorded on both banks	0	13	421	-0.4668	0.1005	0.5674	414	-0.4177	0.0903	0.508
Tapera naevia	does not normally occur in forest	19700000	uncommon	expected on both banks and recorded on both banks	0	7	422	-0.4711	0.0984	0.5695	415	-0.4194	0.0895	0.5088
Ramphocelus carbo	low	11500000	common	expected on both banks and recorded on both banks	8	81	423	-0.4763	0.1516	0.6279	436	-0.5438	0.0962	0.64
Amazona farinosa	low	11900000	common	expected on both banks and recorded on both banks	0	16	424	-0.4832	0.1479	0.6311	438	-0.5465	0.0947	0.6413
Cyclarhis gujanensis	medium	21700000	common	expected on both banks and recorded on both banks	3	16	425	-0.4847	0.1147	0.5995	418	-0.4288	0.1145	0.5434
Cairina moschata	medium	22200000	common	expected on both banks and recorded on both banks	0	67	426	-0.4889	0.1132	0.6021	421	-0.4305	0.1139	0.5444
Myiarchus tuberculifer	medium	22400000	common	expected on both banks and recorded on both banks	0	27	427	-0.4921	0.1111	0.6032	423	-0.4318	0.1131	0.5448
Rostrhamus sociabilis	does not normally occur in forest	22500000	uncommon	expected on both banks and recorded on both banks	3	10	428	-0.4932	0.0874	0.5805	417	-0.4282	0.0851	0.5133
Philohydor lictor	low	12400000	common	expected on both banks and recorded on both banks	1	43	429	-0.4937	0.1432	0.6368	439	-0.5507	0.0928	0.6436
Dendroplex picus	low	12500000	common	expected on both banks and recorded on both banks	9	61	430	-0.4963	0.1416	0.6379	440	-0.5518	0.0922	0.644
Actitis macularius	does not normally occur in forest	23400000	uncommon	expected on both banks and recorded on both banks	1	5	431	-0.4963	0.0858	0.5821	419	-0.4295	0.0844	0.5139
Volatinia jacarina	does not normally occur in forest	23500000	uncommon	expected on both banks and recorded on both banks	4	12	432	-0.4974	0.0853	0.5826	420	-0.4299	0.0842	0.5141
Mustelirallus albicollis	does not normally occur in forest	12900000	uncommon	not expected	0	1	433	-0.4989	0.1426	0.6416	437	-0.5459	0.0964	0.6423
Tachycineta albiventer	low	12700000	common	expected on both banks and recorded on both banks	4	66	434	-0.4995	0.14	0.6395	441	-0.5531	0.0916	0.6446
Columbina talpacoti	does not normally occur in forest	24100000	uncommon	expected on both banks and recorded on both banks	5	48	435	-0.4995	0.0842	0.5837	422	-0.4307	0.0838	0.5145
Dendrocygna autumnalis	does not normally occur in forest	25100000	uncommon	expected on both banks and recorded on both banks	0	10	436	-0.5063	0.0805	0.5868	424	-0.4335	0.0823	0.5158
Glaucis hirsutus	low	13000000	common	expected on both banks and recorded on both banks	5	21	437	-0.5068	0.1363	0.6432	442	-0.556	0.0901	0.6461
Charadrius collaris	does not normally occur in forest	27500000	uncommon	expected on both banks and recorded on both banks	3	21	438	-0.5132	0.0774	0.5905	426	-0.4362	0.0811	0.5173
Geranoaetus albicaudatus	does not normally occur in forest	28500000	uncommon	expected on both banks and recorded on both banks	0	1	439	-0.5168	0.0753	0.5921	427	-0.4377	0.0802	0.5179
Tangara episcopus	low	13300000	common	expected on both banks and recorded on both banks	3	40	440	-0.5174	0.1305	0.6479	443	-0.5602	0.0878	0.648
Megaceryle torquata	medium	34700000	common	expected on both banks and recorded on both banks	0	77	441	-0.5226	0.0963	0.6189	429	-0.444	0.1072	0.5512
Rynchops niger	does not normally occur in forest	41100000	uncommon	expected on both banks and recorded on both banks	1	6	442	-0.5258	0.0711	0.5968	428	-0.4413	0.0785	0.5198
Tyto furcata	does not normally occur in forest	330000000	uncommon	expected on both banks and recorded on both banks	1	1	443	-0.5395	0.0642	0.6037	430	-0.4467	0.0758	0.5225
Stelgidopteryx ruficollis	low	15900000	common	expected on both banks and recorded on both banks	3	57	444	-0.5663	0.1068	0.6732	445	-0.5798	0.0783	0.6581
Zenaida auriculata	low	24300000	uncommon	not expected	0	4	445	-0.5721	0.1016	0.6737	432	-0.5166	0.1055	0.6221
Anthus lutescens	does not normally occur in forest	16700000	uncommon	not expected	0	13	446	-0.5768	0.1037	0.6805	444	-0.5766	0.0811	0.6577
Tigrisoma lineatum	low	16900000	common	expected on both banks and recorded on both banks	3	69	447	-0.5842	0.0979	0.6821	446	-0.5865	0.0749	0.6615
Camptostoma obsoletum	low	17900000	common	expected on both banks and recorded on both banks	3	50	448	-0.5974	0.0916	0.6889	448	-0.5918	0.0724	0.6642
Falco sparverius	low	52700000	uncommon	not expected	0	2	449	-0.6	0.0879	0.6879	433	-0.5278	0.1	0.6278
Progne chalybea	low	19100000	common	expected on both banks and recorded on both banks	0	47	450	-0.6121	0.0842	0.6963	450	-0.5977	0.0695	0.6672
Dryocopus lineatus	low	21300000	common	expected on both banks and recorded on both banks	2	67	451	-0.6263	0.0768	0.7032	451	-0.6034	0.0665	0.6699
Phaetusa simplex	does not normally occur in forest	15800000	common	expected on both banks and recorded on both banks	4	47	452	-0.6368	0.0763	0.7132	468	-0.6661	0.0408	0.7069
Molothrus bonariensis	low	24300000	common	expected on both banks and recorded on both banks	2	8	453	-0.6495	0.0653	0.7147	453	-0.6126	0.0619	0.6745
Aramus guarauna	low	24600000	common	expected on both banks and recorded on both banks	0	41	454	-0.6511	0.0647	0.7158	455	-0.6133	0.0617	0.6749
Crotophaga ani	low	24800000	common	expected on both banks and recorded on both banks	2	52	455	-0.6526	0.0637	0.7163	456	-0.6139	0.0613	0.6752
Platalea ajaja	does not normally occur in forest	27400000	uncommon	not expected	0	3	456	-0.6558	0.0647	0.7205	452	-0.6082	0.0655	0.6737
Jacana jacana	does not normally occur in forest	17100000	common	expected on both banks and recorded on both banks	1	59	457	-0.66	0.0647	0.7247	469	-0.6749	0.0364	0.7114
Chloroceryle americana	low	28200000	common	expected on both banks and recorded on both banks	1	68	458	-0.6637	0.0584	0.7221	459	-0.6183	0.0592	0.6775
Tyrannus melancholicus	low	28500000	common	expected on both banks and recorded on both banks	2	69	459	-0.6653	0.0574	0.7226	461	-0.6189	0.0587	0.6777
Athene cunicularia	does not normally occur in forest	39100000	uncommon	not expected	0	2	460	-0.6674	0.0589	0.7263	454	-0.6128	0.0632	0.676
Pitangus sulphuratus	low	28600000	common	expected on both banks and recorded on both banks	7	81	460	-0.6674	0.0563	0.7237	462	-0.6198	0.0583	0.6781
Cathartes aura	low	40200000	common	expected on both banks and recorded on both banks	0	57	462	-0.6732	0.0537	0.7268	463	-0.6221	0.0573	0.6794
Dendrocygna viduata	does not normally occur in forest	75400000	uncommon	not expected	0	5	463	-0.6758	0.0547	0.7305	457	-0.6162	0.0615	0.6777
Coragyps atratus	low	44300000	common	expected on both banks and recorded on both banks	0	86	464	-0.6763	0.0521	0.7284	464	-0.6234	0.0566	0.68
Gelochelidon nilotica	does not normally occur in forest	145000000	uncommon	not expected	0	1	465	-0.6779	0.0537	0.7316	458	-0.6171	0.0611	0.6781
Troglodytes musculus	low	59200000	common	expected on both banks and recorded on both banks	3	81	466	-0.6795	0.0505	0.73	465	-0.6246	0.056	0.6806
Himantopus mexicanus	does not normally occur in forest	271000000	uncommon	not expected	0	1	467	-0.6811	0.0521	0.7332	460	-0.6183	0.0604	0.6787
Butorides striata	low	286000000	common	expected on both banks and recorded on both banks	3	71	468	-0.6868	0.0468	0.7337	466	-0.6276	0.0545	0.6821
Bubulcus ibis	low	349000000	common	expected on both banks and recorded on both banks	0	30	469	-0.69	0.0453	0.7353	467	-0.6288	0.0539	0.6827
Ardea cocoi	does not normally occur in forest	20600000	common	expected on both banks and recorded on both banks	1	76	470	-0.6974	0.0463	0.7437	470	-0.6899	0.0291	0.7189
Vanellus chilensis	does not normally occur in forest	24800000	common	expected on both banks and recorded on both banks	1	66	471	-0.7253	0.0321	0.7574	471	-0.7011	0.0234	0.7244
Anhinga anhinga	does not normally occur in forest	26500000	common	expected on both banks and recorded on both banks	0	63	472	-0.7311	0.0295	0.7605	472	-0.7034	0.0223	0.7257
Mycteria americana	does not normally occur in forest	28600000	common	expected on both banks and recorded on both banks	0	21	473	-0.74	0.0247	0.7647	473	-0.7069	0.0204	0.7274
Nannopterum brasilianus	does not normally occur in forest	39000000	common	expected on both banks and recorded on both banks	0	49	474	-0.7437	0.0232	0.7668	474	-0.7084	0.0198	0.7282
Egretta thula	does not normally occur in forest	44000000	common	expected on both banks and recorded on both banks	0	38	475	-0.7479	0.0211	0.7689	475	-0.7101	0.0189	0.7291
Ardea alba	does not normally occur in forest	340000000	common	expected on both banks and recorded on both banks	0	23	476	-0.7616	0.0142	0.7758	476	-0.7156	0.0162	0.7318

## Sheet: Sampling points (2005-2007)
Island name	Latitude (S)	Longitude (W)	Area (ha)	Point-count effort	Point-count samples	Mist-net effort
BASE 4 (right bank)
Divisa	4°12'22"	49°30'04"	2551.45	8	48	1344
Trilha 8	4°14'47"	49°31'18"	2551.45	12	69	1344
Trilha 15	4°10'03"	49°31'18"	2551.45	13	78
Marcelo	4°09'17"	49°32'45"	342.43	13	78	1344
Cornélio	4°17'15"	49°28'05"	178.27	13	78	1344
Juarez	4°16'29"	49°30'56"	91.55	11	65	1344
Lucyana	4°10'09"	49°33'47"	98.23	10	59	1344
Urubu-rei	4°16'05"	49°29'25"	31.61	3	18
Nívia-B4	4°14'58"	49°29'41"	40.52	4	24
Tiago-B4	4°13'52"	49°30'19"	32.53	4	23
Cornélio-Jr	4°17'42"	49°29'05"	36.18	4	20
Guariba	4°10'39"	49°32'40"	19.5	2	12	672
João-do-Bó	4°18'18"	49°29'40"	18.59			672
Duca	4°17'11"	49°30'25"	11.02	3	18	672
Panema	4°10'33"	49°33'05"	5.4	4	24	672
Fantasia	4°15'24"	49°30'07"	26.06	4	24
Chuva	4°10'59"	49°32'29"	3.79	2	12
Bicuda	4°09'30"	49°32'01"	113.99	6	36
Fora	4°08'26"	49°33'57"	5.95	2	12
Barranco	4°09'34"	49°34'07"	16.99	3	18
Castanha	4°09'03"	49°33'24"	4.29	2	8
BASE 3 (left bank)
Pedral	4°22'17"	49°35'18"	1823.35	8	46
Trilha Início	4°22'02"	49°36'26"	1823.35	5	30	1344
Trilha Final	4°22'00"	49°36'27"	1823.35	8	48	1344
Prefeito	4°19'51"	49°37'35"	198.66	13	76	1344
Tamarindo	4°16'09"	49°39'49"	232.74	13	78	1344
Eduardo	4°18'32"	49°39'17"	251.93	13	70
Sidnei	4°20'47"	49°37'32"	34.62	4	21	1344
Nívia-B3	4°17'38"	49°37'25"	18.3	3	15	1344
Miúdo	4°25'15"	49°33'16"	57.75	8	45
Roça	4°25'41"	49°33'38"	34.35	6	36
Gito	4°17'52"	49°36'47"	33.19	6	33
Queimada	4°16'23"	49°38'55"	43.09	4	19
Chifre	4°17'16"	49°38'04"	34.79	4	23
Soro	4°18'35"	49°37'07"	7.31			672
Lobão	4°18'22"	49°37'38"	17.09	4	21	1344
Ailton	4°21'06"	49°35'13"	14.74	2	12	672
Tiago-B3	4°15'40"	49°37'57"	73.81			1344
Vandir	4°22'31"	49°33'47"	24.39	3	18
Caua	4°23'18"	49°34'08"	3.39	2	9
Carrapato	4°23'56"	49°34'22"	19.17	3	18
Embaúba	4°18'08"	49°38'12"	28.32	4	24
Placa	4°19'12"	49°37'51"	22.95	4	22

## Sheet: Census stretches (2005-2007)
Boat Census	Year	Reservoir Bank	Starting point (Latitude - S)	Starting point (Longitude - W)	Final point (Latitude - S)	Final point (Longitude - W)	Number of 30-minute lists
1	2005	Left	03º52'8.17"	49º34'4.21"	03º57'20.50"	49º31'2.42"	7
2	2005	Left	03º55'34.05"	49º48'43.91"	04º59'57.62"	49º25'22.54"	7
3	2005	Right	04º00'2.56"	49º53'17.76"	03º57'28.64"	49º50'2.85"	11
4	2005	Right	04º09'35.11"	49º43'1.34"	04º7'29.96"	49º39'12.17"	9
5	2005	Right	03º54'42.31"	49º 48'13.96"	03º23'44.51"	49º50'35.25"	10
6	2005	Left	04º10'5.34"	49º43'46.60"	03º23'2.20"	49º39'5.50"	10
7	2005	Left	03º47'34.17"	49º31'45.85"	04º15'55.76"	49º31'51.92"	10
8	2005	Right	04º26'40.14"	49º24'59.19"	04º22'13.81"	49º25'50.86"	10
9	2005	Right	04º31'45.66"	49º17'59.49"	04º31'3.06"	49º25'3.39"	11
10	2005	Right	04º19'11.59"	49º42'50.51"	04º 22'37.20"	49º49'43.90"	10
11	2005	Right	04º20'59.11"	49º35'8.82"	04º20'59.11"	49º35'8.82"	10
12	2005	Right	04º33'3.09"	49º38'12.85"	04º32'14.22"	49º31'46.42"	7
13	2005	Right	04º59'11.19"	49º19'16.60"	04º38'53.45"	49º26'50.28"	7
14	2005	Left	03º50'35,1"	49º42'23.9"	03º56'32.1"	49º44'12.2"	10
15	2005	Left	03º56'30,4"	49º44'14.1"	03º054'02.3"	49º44'22.2"	10
16	2005	Left	03º56'03,1"	49º44' 22.5"	03º55'21.6"	49º46'45.5"	9
17	2005	Left	03º55'21"	49º46'44,8"	03º56'41"	49º26'23,6"	9
18	2005	Left	03º57'00,2"	49º46'54,3"	03º59'55,9"	49º47'19,0"	9
19	2005	Left	03º59'55,9"	49º47'18,0"	04º00'41,3"	49º49'00,7"	9
20	2005	Left	04º31'20.3''	49º34'04.6"	04º33'37.6''	49º39'50.9"	10
21	2005	Right	04º32'01.9''	49º20'59.8"	04º31'04.8''	049º17'01.7"	7
22	2005	Right	04º24'15.4''	49º33'59.0"	04º25'04.7''	49º33'59.0"	10
23	2005	Right	04º01'40''	49º32'30.3''	04º02'56.0''	049º33'40.2''	8
24	2005	Right	04º33'27.3''	49º24'12.7"	04º34'15.1''	49º18'12.3"	7
25	2005	Right	04º36'29.1''	49º23'35.1"	04º36'35.4''	49º21'57.2"	9
26	2006	Left	04º00'58.0''	49º39'43.7"	03º59'12.9''	49º42'33.9"	9
27	2006	Left	03º59'25.9''	49º42'57.7"	04º00'29.9''	49º45'29.4"	10
28	2006	Left	04º00'34.3''	49º45'09.8"	04º01'47.6''	49º44'13.3"	10
29	2006	Left	04º02'19.9''	49º44'31.7"	04º02'34.3''	49º43'41.0"	9
30	2006	Left	04º02'15.4''	49º43'08.9"	04º03'54.2''	49º42'41.7"	9
31	2006	Left	04º04'25.2''	49º42'55.1"	04º04'10.6''	49º46'13.5"	9
32	2006	Right	04º05'31.5''	49º43'06.5"	04º07'26.7''	49º44'26.8"	10
33	2006	Right	04º06'52.1''	49º42'59.0"	04º09'26.2"	49º44'25.1"	9
34	2006	Right	04º10'13.7"	49º43'23.2"	04º10'02.1"	49º45'22.7"	9
35	2006	Right	04º10'18.2"	49º45'43.4"	04º08'37,0"	49º47'59.1"	9
36	2006	Right	04º 08'01,4"	49º48' 02.9"	04º08'43,1"	49º49'13.1"	10
37	2006	Right	04º08'54,7"	49º48' 29.7"	04º10'24,7"	49º48'41.3"	10
38	2006	Left	03º59'06,5"	49º51' 42.0"	04º01'05,4"	49º53'59.2"	7
39	2006	Left	04º01'06,9"	49º53' 43.5"	03º57'10,8"	49º51'03.2"	9
40	2006	Left	03º56'52,1"	49º50' 53.2"	03º57'02,0"	49º49'40.7"	9
41	2006	Left	03º57'02,8"	49º49' 36.9"	03º55'15,6"	49º50'49,7"	9
42	2006	Left	03º54'55,0"	49º50' 54,8"	03º54'47,5"	49º50'28,3"	10
43	2006	Left	03º55'09,6"	49º49' 58,8"	03º 51' 32,2"	49º46'00,9"	10
44	2007	Left	03º55'23,7"	49º48'43,3	03º59'40,4"	49º48'58,8"	10
45	2007	Left	03º58'50,5"	49º49'20,8"	04º02'16,8"	49º51'49,1"	10
46	2007	Right	04º02'30,8"	49º50'44,2"	04º00'42,2"	49º52'54,2"	10
47	2007	Right	04º01'29,4"	49º53'49,4"	04º02'12,3"	49º55'42,5"	10
48	2007	Right	04º01'58,4"	49º56'42,2"	03º59'10,9"	49º54'09,3"	10
49	2007	Left	03º59'28,5"	49º53'50"	03º58'11,3"	49º54'20,8"	10
50	2007	Left	03º57'54,4"	49º54'51,8"	03º57'52,6"	49º52'29,7"	10
51	2007	Left	03º56'55,6"	49º52'54,7"	03º54'31,8"	49º53'25,8"	10
52	2007	Left	03º54'45,4"	49º53'56,2"	03º52'38,6"	49º55'36,6"	10
53	2007	Left	03º52'29,8"	49º55'18,6"	03º51'55,3"	49º51'17,8"	10
54	2007	Right	04º14'59,6"	49º32'02,7"	04º12'30,1"	49º30'48,7"	10
55	2007	Right	04º12'05,1"	49º30'46,2"	04º10'03,8"	49º31'26,2"	10
56	2007	Right	04º08'59,8"	49º31'59,6"	04º06'58,8"	49º32'54,9"	10
57	2007	Right	04º05'58,5"	49º72'46,41"	04º02'58,3"	49º33'26,7"	10
58	2007	Right	04º04'35,4"	49º31'24,6"	04º03'00,7"	49º33'10,2"	10
59	2007	Right	04º01'54,1"	49º34'01,1"	03º59'01,5"	49º33'22,6"	10
60	2007	Left	03º58'07,6"	49º32'25,7"	03º56'25,3"	49º32'56,2"	10
61	2007	Left	03º55'59,5"	49º33'20,5"	03º53'35,9"	49º35'25,5"	10
62	2007	Left	03º52'52,2"	49º34'36,2"	03º51'24,2"	49º33'17,7"	10
63	2007	Left	03º51'15,9"	49º33'44,9"	03º48'15,5"	49º32'36,5"	10
64	2007	Left	03º51'39,7"	49º38'22,9"	03º57'51,2"	49º39'37,3"	10
65	2007	Left	03º58'54,4"	49º39'49,9"	03º58'26,0"	49º41',1"	10
66	2007	Left	03º58'13,9"	49º42'23,4"	03º58'58,8"	49º44'12,6"	10
67	2007	Left	03º59'21,6"	49º45'19,8"	04º00'53,3"	49º44'02,4"	10
68	2007	Right	04º01'23,3"	49º44'02,3"	04º02'02,5"	49º43'16,5"	10
69	2007	Right	04º02'47,3"	49º43'11,8"	04º04'06,5"	49º42'06,8"	10
70	2007	Right	04º04'01,5"	49º42'33,2"	04º04'43,2"	49º42'45,2"	10
71	2007	Right	04º05'34,9"	49º44'13,4"	04º06'54,2"	49º43'24,3"	10
72	2007	Right	04º06'52,6"	49º43'09,3"	04º08'46,7"	49º42'33,8"	10
73	2007	Right	04º08'27,8"	49º41'41,0"	04º09'11,7"	49º43'25,3"	10
74	2007	Right	04º15'05,1"	49º31'52,2"	04º13'09,5"	49º29'52,1"	10
75	2007	Right	04º13'31,3"	49º29'50,6"	04º12'53,8"	49º27'34,0"	10
76	2007	Right	04º13'13,1"	49º27'27,0"	04º14'52,8"	49º24'46,5"	10
77	2007	Right	04º15'47,2"	49º24'42,8"	04º17'27,2"	49º26'28,3"	10
78	2007	Right	04º18'00,2"	49º26'15,5"	04º17'16,0"	49º23'23,8"	10
79	2007	Right	04º17'43,5"	49º23'10,7"	04º19'42,3"	49º24'59,9"	10
80	2007	Right	04º19'41,6"	49º25'18,7"	04º23'26,8"	49º26'16,9"	10
81	2007	Right	04º23'51,9"	49º26'42,8"	04º23'21,1"	49º24'02,0"	10
82	2007	Right	04º23'26,1"	49º24'58,2"	04º26'35,8"	49º21'30,6"	10
83	2007	Right	04º23'06,2"	49º20'50,0"	04º26'31,9"	49º25'14,7"	10
84	2007	Right	04º32'41,3"	49º26'09,7"	04º32'02,1"	49º23'02,0"	10
85	2007	Right	04º31'35,0"	49º22'20,5"	04º32'34,7"	49º22'54,7"	10
86	2007	Right	04º46'01,2"	49º25'13,7"	04º56'05,0"	49º21'00,7"	10
87	2007	Right	04º45'59,7"	49º25'44,7"	04º39'44,4"	49º26'44,0"	8
88	2007	Right	04º31'12,8"	49º31'35,3"	04º32'00,5"	49º33'06,9"	11
89	2007	Right	04º32'41,6"	49º34'05,1'	04º32'59,4"	49º36'44,6"	11
90	2007	Right	04º21'21,5"	49º34'18,9"	04º21'17,6"	49º35'30,5"	10
91	2007	Right	04º20'32,5"	49º35'51,3"	04º20'16,3"	49º37'08,0"	10
92	2007	Right	04º19'37,6"	49º43'06,7"	04º22'05,2"	49º48'20,5"	10
93	2007	Right	04º21'59,2"	49º47'24,3"	04º20'47,3"	49º46'30,3"	10

## Sheet:  Historical sites (1907-1984)
Ornithological localities	Sample year	Figure 1-B number
Cametá (left bank)	1911, 1912, 1916, 1933, 1966	1
Campo de Pucurijó (left bank, near Cametá)	1916	1
Fazenda Vaicajó (left bank, near Cametá)	1916	1
Ilha do Taiúna, near Cameta	1931	1
Mazagão (right bank)	1912	2
Mocajuba (right bank)	1931	3
Baião (right bank)	1908, 1910, 1919, 1931	4
Igarapé Boca do Manapiri	1910	4
Igarapé Pai Lourenço	1910	4
Igarapé Pirinum [=Ilha Pirinum]	1910	4
Igarapé Araramanha, near Baiao	1910	4
Sitio Calandrini (left bank, near Tucuruí) [=Tucuruí]	1978	5
Alcobaça [=Tucuruí] (left bank)	1907, 1912, 1920	6
Fazendas Reunidas (near Tucuruí)	1985	6
Tucuruí (left bank)	1985	6
Ilha Sao Sebastiao, near Alcobaca [=Tucurui]	1907	6
Vila Permanente [=Tucuruí]	1984	6
Vila Temporária I [=Tucuruí]	1984	6
Ararão (left bank, near Tucuruí)	1984	6
Novo Breu Branco (rigth bank) [=Tucurui, right bank]	1984	7
*Vale do Caraipé (left bank, near Tucuruí)	1984	8
*Arumateua (left bank, 25 Km from Tucuruí on EFT )	1907, 1911, 1912	9
*Breu Branco (left bank, 46 Km from Tucurui on EFT)	1984	10
Cocal (left bank)	1984	11
Rio Arapari/Rio Pucuruí (left bank)	1984	12
*Base 4 (right bank)	1982, 1984, 1986, 1988	13
*Remansão da Beira (left bank, 97 Km from Tucuruí on EFT)	1984	14
*Base 3 (left bank)	1984	15
Ilha Tocantins	1984	16
*Jacundazinho (right bank)	1984	17
Céu Azul (rigth bank, between Jacundá/Jacundazinho)	1984	18
*Jacundá (right bank)	1984	19
*Jatobal (left bank, 117 Km from Tucuruí on EFT)	1984	20
*Jacundá (left bank)	1984	21
*Igarape Saúde (left bank)	1984	22
Itupiranga (left bank)	1967	23
Itupitunga [=Itupiranga]		23
Marabá (left bank)	1920, 1957, 1984, 1986	24
Sítio Floresta (left bank, near Marabá) [=Marabá]	1920	24
Canoal (right bank)	1984	?
*Igarapé Altamira (right bank)	1984	?
Igarapé Itacuna	1911	?
Ilha das Pacas	1907	?
Ilha Pararú	1911	?
Ilha Tangerina	1984	?
Praia Alta (left bank)	1984	?
Prainha (left bank)	1984	?
Retiro (rigth bank)	1978	?
Timbozal (left bank)	1984	?

## Sheet: Land Cover_THR
APA Lago de Tucuruí	Km2
Land Cover	1985	2019
Forest	2932.62	1393.77
Non forest	107.552	0
Agro-cultivable areas	319.282	1456.32
Urban area	3.30683	7.80249
Hydrography and Flooded Area	2317.9	2821.49
Others	0	1.28595
Total	5680.67	5680.67
Surroundings APA Lago de Tucuruí	Km2
Land Cover	1985	2019
Forest	7456.66	3667.35
Not forest	5.75254	0
Agro-cultivable areas	1357.04	5122.41
Urban area	12.6776	29.2829
Hydrography	47.2804	54.3199
Others	0	6.03405
Total	8879.4	8879.4
Total area (rectangle inserted in Figure 1 C)	Km2
Land Cover	1985	2019
Forest	10389.3	5061.12
Not forest	113.305	0
Agro-cultivable areas	1676.32	6578.72
Urban area	15.9844	37.0854
Hydrography	2365.18	2875.81
Others	0	7.32
Total	14560.1	14560.1
